# Supplementary material for: Solid-phase extraction as sample preparation of water samples for cell-based and otherin vitrobioassays
Source: Royal Society of Chemistry journal article supplement (doi:10.1039/c7em00555e), 2018-01-01
Supplement: c7em00555e2.xlsx [file c7em00555e2.xlsx]

## Sheet: Table S3
Table S3: List of the 579 chemicals spiked into Wormsgraben water.
log Kow and log Dow(pH7) values and average microspecies charges (weighted averge charge of the co-occuring microspecies at pH 7.4) were calculated using Chemaxon's Calculator Plugins version 15.7.1300.2480. A free academic license of JChem for Office (Excel) was used for chemical structure based property calculation (https://www.chemaxon.com)
log Kow(ACD) and log Dow(pH7) (ACD) values are from ACD/Percepta (2015) Build 2726, Advanced Chemistry Development, Inc., Toronto, On, Canada, http://www.acdlabs.com.
Compound name	CAS No.	InChIKey	ChemSpider ID	PubChem CID	SMILES	Molecular formula	Molecular Weight (g/mol)	Log Kow (ACD)	Log Kow (Chemaxon)	Log Dow (pH 7) (ACD)	logD pH 7.4 (Chemaxon)	Average microspecies charge pH 7.4 (Chemaxon)
(3-Chloro-2-hydroxypropyl)trimethylammonium	3327-22-8	XIUCEANTZSXBQQ-UHFFFAOYSA-N	17689	18732	C[N+](C)(C)CC(O)CCl	C6H15ClNO	153.65	-3.42	-3.93801	-3.42	-3.93796	0
(4-Sulfophenyl)acetic acid	153661-28-0	KGJGWDQUGUEMIW-UHFFFAOYSA-N	4376218	5205069	OC(=O)Cc1ccc(cc1)S(O)(=O)=O	C8H8O5S	216.21	-0.37	0.791901	-5.11	-4.99646	-2
(Methoxymethyl)triphenylphosphonium	4009-98-7	SDMCZCALYDCRBH-UHFFFAOYSA-N	2005990	2723799	COC[P+](C1=CC=CC=C1)(C1=CC=CC=C1)C1=CC=CC=C1	C20H20OP	308.36	0.7	4.32995	0.7	4.32995	0
1-(3-carboxypropyl)-3,7-dimethylxanthine	6493-07-08	WKASGTGXOGALBG-UHFFFAOYSA-N	133451	151419	CN1C=NC2=C1C(=O)N(CCCC(O)=O)C(=O)N2C	C11H14N4O4	266.26	0.2	-0.541988	-2.15	-3.82196	-1
1-Butyl-3-methyl-imidazolium	79917-90-1	IQQRAVYLUAZUGX-UHFFFAOYSA-N	2015918	2734162	CCCC[N+]1=CN(C)C=C1	C8H15N2	140.23	-2.87	-2.14598	-2.87	-2.14598	1
1-Chloro-2-nitrobenzene	88-73-3	BFCFYVKQTRLZHA-UHFFFAOYSA-N	13853953	6945	[O-][N+](=O)C1=CC=CC=C1Cl	C6H4ClNO2	157.56	2.43	2.51727	2.43	2.51727	0
1-Ethyl-3-methyl-imidazolium	65039-09-0	NJMWOUFKYKNWDW-UHFFFAOYSA-N	151883	174076	CC[N+]1=CN(C)C=C1	C6H11N2	112.18	-3.19	-3.11307	-3.19	-3.11307	1
1-Methylimidazole	616-47-7	MCTWTZJPVLRJOU-UHFFFAOYSA-N	1348	1390	CN1C=CN=C1	C4H6N2	82.11	0.13	0.0784519	-0.17	0.00576409	0.21
1-Naphthol	90-15-3	KJCVRFUGPWSIIH-UHFFFAOYSA-N	10608388, 14391940, 14521368, 15302313, 6739	7005	Oc1cccc2ccccc12	C10H8O	144.17	2.92	2.65916	2.92	2.65645	-0.01
1,2-Benzisothiazolinone	2634-33-5	DMSMPAJRVJJAGA-UHFFFAOYSA-N	16567	17520	O=c1[nH]sc2ccccc12	C7H5NOS	151.18	1.41	1.35793	1.41	1.35487	-0.01
1,2,4-Triazole	288-88-0	NSPMIYGKQJPBQR-UHFFFAOYSA-N	8900	9257	N1C=NC=N1	C2H3N3	69.07	-0.51	-0.40909	-0.51	-0.410442	0
1,3-Dimethyl-2-imidazolidinone	80-73-9	CYSGHNMQYZDMIA-UHFFFAOYSA-N	6409	6661	CN1CCN(C)C1=O	C5H10N2O	114.15	0.38	-0.640655	0.38	-0.640655	0
1,3-Diphenylguanidine	102-06-7	OWRCNXZUPFZXOS-UHFFFAOYSA-N	7313	7594	N=C(NC1=CC=CC=C1)NC1=CC=CC=C1	C13H13N3	211.27	2.57	3.13132	2.34	1.27905	0.99
10,11-Dihydro-10-hydroxycarbamazepine	29331-92-8	BMPDWHIDQYTSHX-UHFFFAOYNA-N	5417572	7061801	NC(=O)N1c2ccccc2CC(O)c2ccccc12	C15H14N2O2	254.29	1.41	1.73174	1.41	1.73174	0
10,11-Dihydro-10,11-dihydroxycarbamazepine	35079-97-1	PRGQOPPDPVELEG-UHFFFAOYNA-N	75667	83852	NC(=O)N1c2ccccc2C(O)C(O)c2ccccc12	C15H14N2O3	270.29	0.45	0.812745	0.45	0.812743	0
11-Ketotestosterone	564-35-2	WTPMRQZHJLJSBO-XQALERBDSA-N	4445528	5282365	C[C@]12CC(=O)[C@H]3[C@@H](CCC4=CC(=O)CC[C@]34C)[C@@H]1CC[C@@H]2O	C19H26O3	302.42	2.06	2.44217	2.06	2.44217	0
17α –Ethinylestradiol	57-63-6	BFPYWIDHMRZLRN-SLHNCBLASA-N	61840	68570	C[C@]12CC[C@H]3[C@@H](CCc4cc(O)ccc34)[C@@H]1CC[C@H]2O	C18H24O2	296.41	3.87	3.7455	3.87	3.74499	0
17α –Hydroxyprogesterone	139517-03-6	DBPWSSGDRRHUNT-UHFFFAOYNA-N	5770	5991	C[C@]12CC[C@H]3[C@@H](CCc4cc(O)ccc34)[C@@H]1CC[C@@]2(O)C#C	C20H24O2	330.47	3.16	3.89735	3.16	3.89684	0
17α –Methyltestosterone	58-18-4	GCKMFJBGXUYNAG-HLXURNFRSA-N	5554	5757	C[C@]12CC[C@H]3[C@@H](CCc4cc(O)ccc34)[C@@H]1CC[C@@H]2O	C18H24O2	302.46	3.53	3.7455	3.53	3.74499	0
17α-Estradiol	57-91-0	VOXZDWNPVJITMN-SFFUCWETSA-N	455281	521928	CC(=O)C1(O)CCC2C3CCC4=CC(=O)CCC4(C)C3CCC12C	C21H30O3	272.39	3.62	3.40118	3.62	3.40118	0
17β-Estradiol	50-28-2	VOXZDWNPVJITMN-ZBRFXRBCSA-N	5788	6010	C[C@]1(O)CC[C@H]2[C@@H]3CCC4=CC(=O)CC[C@]4(C)[C@H]3CC[C@]12C	C20H30O2	272.39	3.62	3.646	3.62	3.646	0
1H-Benzotriazole	95-14-7	QRUDEWIWKLJBPS-UHFFFAOYSA-N	6950	7220	c1ccc2[nH]nnc2c1	C6H5N3	119.13	1.54	1.30128	1.52	1.27686	-0.06
2-(2-(Chlorophenyl)amino)benzaldehyde	71758-44-6	DAAHPDZFLSFYPJ-UHFFFAOYSA-N	26001359	53423421	Clc1ccccc1Nc1ccccc1C=O	C13H10ClNO	231.68	3.91	5.02972	3.91	5.02972	0
2-(Methylthio)benzothiazole	615-22-5	UTBVIMLZIRIFFR-UHFFFAOYSA-N	11494	11989	CSc1nc2ccccc2s1	C8H7NS2	181.27	2.87	3.42594	2.87	3.42594	0
2-Acetonaphthone	93-08-3	XSAYZAUNJMRRIR-UHFFFAOYSA-N	11383541, 15179730, 6855	7122	CC(=O)c1ccc2ccccc2c1	C12H10O	170.21	3.04	2.52037	3.04	2.52037	0
2-Aminobenzimidazole	934-32-7	JWYUFVNJZUSCSM-UHFFFAOYSA-N	13035, 10707281, 11179548, , 14880377, 16345571	13624, 53400355	Nc1nc2ccccc2[nH]1	C7H7N3	133.15	1.07	1.11483	0.64	0.403397	0.84
2-Benzothiazolesulfonic acid	941-57-1	ZCXGMSGCBDSEOY-UHFFFAOYSA-N	28443	30647	OS(=O)(=O)c1nc2ccccc2s1	C7H5NO3S2	215.24	0.49	-0.259291	-3.01	-0.39777	-1
2-Ethoxyethyl acetate	111-15-9	SVONRAPFKPVNKG-UHFFFAOYSA-N	13839109	8095	CCOCCOC(C)=O	C6H12O3	132.16	0.89	0.232381	0.89	0.232381	0
2-Hydroxyatrazine	2163-68-0	NFMIMWNQWAWNDW-UHFFFAOYSA-N	15693	16553	CCNC1=NC(O)=NC(NC(C)C)=N1	C8H15N5O	197.24	2.71	1.66427	0.32	1.66426	0
2-Hydroxybenzothiazole	934-34-9	YEDUAINPPJYDJZ-UHFFFAOYSA-N	13036	13625	O=C1NC2=CC=CC=C2S1	C7H5NOS	151.18	1.74	1.98951	1.74	1.98946	0
2-Hydroxycarbamazepine	68011-66-5	VPZIYMMSJFWLSP-UHFFFAOYSA-N	114505	129274	NC(=O)N1c2ccccc2C=Cc2cc(O)ccc12	C15H12N2O2	252.27	2.01	2.46247	2.01	2.45483	-0.02
2-Hydroxyquinoline	59-31-4	LISFMEBWQUVKPJ-UHFFFAOYSA-N	5816	6038	OC1=NC2=CC=CC=C2C=C1	C9H7NO	145.16	2	2.42179	1.97	2.42178	0
2-Isopropyl-6-methyl-pyrimidin-4-ol	2814-20-2	AJPIUNPJBFBUKK-UHFFFAOYSA-N	16799	17777	CC(C)C1=NC(C)=CC(=O)N1	C8H12N2O	152.2	0.23	0.936511	0.22	0.884108	-0.13
2-Isopropylthioxanthone	5495-84-1	KTALPKYXQZGAEG-UHFFFAOYSA-N	71936	79633	CC(C)c1ccc2sc3ccccc3c(=O)c2c1	C16H14OS	254.35	4.61	4.89311	4.61	4.89311	0
2-Mercaptobenzothiazole	149-30-4	YXIWHUQXZSMYRE-UHFFFAOYSA-N	608157	697993	Sc1nc2ccccc2s1	C7H5NS2	167.24	2.34	2.89093	0.35	2.63204	-0.47
2-Methylbenzothiazole	120-75-2	DXYYSGDWQCSKKO-UHFFFAOYSA-N	10657775, 13268075, 13683554, 8138	8446	Cc1nc2ccccc2s1	C8H7NS	149.21	2.46	2.23654	2.46	2.23652	0
2-Morpholinothiobenzothiazole	102-77-2	MHKLKWCYGIBEQF-UHFFFAOYSA-N	7337	7619	C1CN(CCO1)SC1=NC2=CC=CC=C2S1	C11H12N2OS2	252.35	2.22	2.54172	2.22	2.54172	0
2-Naphthalene sulfonic acid	120-18-3	KVBGVZZKJNLNJU-UHFFFAOYSA-N	8113	8420	OS(=O)(=O)c1ccc2ccccc2c1	C10H8O3S	208.23	0.8	2.14363	-2.7	-0.232769	-1
2-Octyl-4-isothiazolin-3-one	26530-20-1	JPMIIZHYYWMHDT-UHFFFAOYSA-N	30932	33528	CCCCCCCCn1sccc1=O	C11H19NOS	213.34	2.99	3.33319	2.99	3.33319	0
2-Phenylphenol	90-43-7	LLEMOWNGBBNAJR-UHFFFAOYSA-N	10668344, 13719700, 13839012	7017, 18704376	Oc1ccccc1-c1ccccc1	C12H10O	170.21	3.08	3.31691	3.08	3.31472	-0.01
2-Thiouracil	141-90-2	ZEMGGZBWXRYJHK-UHFFFAOYSA-N	1066108	1269845	O=C1NC(=S)NC=C1	C4H4N2OS	128.15	-0.82	0.0345786	-0.89	-0.0422381	-0.16
2,2-Dimethoxy-2-phenylacetophenone	24650-42-8	KWVGIHKZDCUPEU-UHFFFAOYSA-N	81777	90571	COC(OC)(C(=O)c1ccccc1)c1ccccc1	C16H16O3	256.3	3.9	3.89883	3.9	3.89883	0
2,2,6,6-Tetramethyl-4 piperidone	826-36-8	JWUXJYZVKZKLTJ-UHFFFAOYSA-N	12665	13220	CC1(C)CC(=O)CC(C)(C)N1	C9H17NO	155.24	1.14	1.18439	-1.01	0.0537823	0.93
2,3-Epoxypropyltrimethylammonium	3033-77-0	LRQFRDLKOBFOSG-UHFFFAOYNA-N	17196	18205	C[N+](C)(C)CC1CO1	C6H14NO	117.19	-3.1	-4.1309	-3.1	-4.1309	0
2,4-diaminobenzenesulfonic acid	88-63-1	JVMSQRAXNZPDHF-UHFFFAOYSA-N	59990	66623	Nc1ccc(c(N)c1)S(O)(=O)=O	C6H8N2O3S	188.2	-1.1	-0.793763	-4.6	-2.87179	-1
2,4-Dichlorobenzoic acid	84057-84-1	ATCRIUVQKHMXSH-UHFFFAOYSA-N	5583	5787	OC(=O)C1=CC=C(Cl)C=C1Cl	C7H4Cl2O2	191.01	2.96	2.83892	-0.16	-0.626871	-1
2,4-Dichlorophenol	120-83-2	HFZWRUODUSTPEG-UHFFFAOYSA-N	8140	8449	Oc1ccc(Cl)cc1Cl	C6H4Cl2O	163	3.14	2.87777	3.1	2.59928	-0.48
2,4-Dichlorophenoxyacetic acid	94-75-7	OVSKIKFHRZPJSS-UHFFFAOYSA-N	13738162	18790815	OC(=O)COc1ccc(Cl)cc1Cl	C8H6Cl2O3	221.04	2.84	2.50165	-0.72	-0.991573	-1
2,4-Dinitrophenol	51-28-5	UFBJCMHMOXMLKC-UHFFFAOYSA-N	1448	1493	Oc1ccc(cc1N(=O)=O)N(=O)=O	C6H4N2O5	184.11	1.66	1.54965	-1.08	-0.369195	-1
2,6-Di-tert-butyl-1,4-benzoquinone	719-22-2	RDQSIADLBQFVMY-UHFFFAOYSA-N	12336	12867	CC(C)(C)C1=CC(=O)C=C(C1=O)C(C)(C)C	C14H20O2	220.31	3.87	3.87848	3.87	3.87848	0
2,6-Di-tert-Butylphenol	128-39-2	DKCPKDPYUFEZCP-UHFFFAOYSA-N	29135	31405	CC(C)(C)c1cccc(c1O)C(C)(C)C	C14H22O	206.33	4.69	4.75979	4.69	4.75973	0
2,6-Dichlorobenzamide	2008-58-4	JHSPCUHPSIUQRB-UHFFFAOYSA-N	15359	16183	NC(=O)c1c(Cl)cccc1Cl	C7H5Cl2NO	190.03	1.28	2.03198	1.28	2.03198	0
2,6-Xylidine	87-62-7	UFFBMTHBGFGIHF-UHFFFAOYSA-N	13604799, 6630	6896	Cc1cccc(C)c1N	C8H11N	121.18	1.64	2.17116	1.64	2.17081	0
2,7-Naphthalenedisulfonic acid	92-41-1	VILFVXYKHXVYAB-UHFFFAOYSA-N	60073	66707	OS(=O)(=O)c1ccc2ccc(cc2c1)S(O)(=O)=O	C10H8O6S2	288.29	-0.89	1.32454	-5.39	-3.42826	-2
2(4-Morpholinyl)benzothiazole	4225-26-7	VVUVJGRVEYHIHC-UHFFFAOYSA-N	70292	77901	C1CN(CCO1)C1=NC2=CC=CC=C2S1	C11H12N2OS	220.29	1.99	2.68727	1.99	2.68726	0
3-Iodopropynyl butylcarbamate	55406-53-6	WYVVKGNFXHOCQV-UHFFFAOYSA-N	55933	62097	CCCCNC(=O)OCC#CI	C8H12INO2	281.09	3.2	2.5439	3.2	2.5439	0
3,4-Dichlorophenylurea	2327-02-08	CYESCLHCWJKRKM-UHFFFAOYSA-N	15972	16854	NC(=O)Nc1ccc(Cl)c(Cl)c1	C7H6Cl2N2O	205.04	2.5	2.0855	2.5	2.0855	0
3,4,5-Trichlorophenol	609-19-8	GBNHEBQXJVDXSW-UHFFFAOYSA-N	11366	11859	OC1=CC(Cl)=C(Cl)C(Cl)=C1	C6H3Cl3O	197.45	3.89	3.48181	3.8	3.32275	-0.31
3,5-Dimethyl-1-hexyn-3-ol	107-54-0	NECRQCBKTGZNMH-UHFFFAOYNA-N	54978	61018	CC(C)CC(C)(O)C#C	C8H14O	126.2	1.67	1.66077	1.67	1.66077	0
3,5,6-Trichloro-2-pyridinol	6515-38-4	WCYYAQFQZQEUEN-UHFFFAOYSA-N	21541	23017	Oc1nc(Cl)c(Cl)cc1Cl	C5H2Cl3NO	198.44	2.88	3.07878	1.47	3.06594	-0.03
4-(Dimethylamino)pyridine	1122-58-3	VHYFNPMBLIVWCW-UHFFFAOYSA-N	13646	14284	CN(C)C1=CC=NC=C1	C7H10N2	122.17	1.26	0.863617	-0.95	0.00881371	0.96
4-Amino-N,N-dimethylbenzenesulfonamide	1709-59-7	BABGMPQXLCJMSK-UHFFFAOYSA-N	66962	74369	CN(C)S(=O)(=O)c1ccc(N)cc1	C8H12N2O2S	200.26	0.69	0.197703	0.69	0.197699	0
4-Aminoantipyrine	83-07-8	RLFWWDJHLFCNIJ-UHFFFAOYSA-N	2066	2151	Cc1c(N)c(=O)n(-c2ccccc2)n1C	C11H13N3O	203.25	0.15	0.334967	0.15	0.334967	0
4-Aminobenzamide	2835-68-9	QIKYZXDTTPVVAC-UHFFFAOYSA-N	11461, 15282773	11955	NC(=O)c1ccc(N)cc1	C7H8N2O	136.15	-0.28	-0.00503984	-0.28	-0.00508116	0
4-Androsten-11B-ol-3,17-dione	382-44-5	WSCUHXPGYUMQEX-KCZNZURUSA-N	84958	94141	C[C@]12C[C@H](O)[C@H]3[C@@H](CCC4=CC(=O)CC[C@]34C)[C@@H]1CCC2=O	C19H26O3	302.42	1.9	2.62019	1.9	2.62019	0
4-Androstene-3,17-dione	63-05-8	AEMFNILZOJDQLW-QAGGRKNESA-N	5898	6128	C[C@]12CC[C@H]3[C@@H](CCC4=CC(=O)CC[C@]34C)[C@@H]1CCC2=O	C19H26O2	286.42	2.9	3.92895	2.9	3.92895	0
4-Bromophenol	106-41-2	GZFGOTFRPZRKDS-UHFFFAOYSA-N	13842573	7808	OC1=CC=C(Br)C=C1	C6H5BrO	173.01	2.55	2.43843	2.55	2.42973	-0.02
4-Chlorophenol	106-48-9	WXNZTHHGJRFXKQ-UHFFFAOYSA-N	13875219	4684	OC1=CC=C(Cl)C=C1	C6H5ClO	128.56	2.49	2.27373	2.49	2.26209	-0.03
4-Cumylphenol	599-64-4	QBDSZLJBMIMQRS-UHFFFAOYSA-N	11249	11742	CC(C)(C1=CC=CC=C1)C1=CC=C(O)C=C1	C15H16O	212.29	4.3	4.34854	4.3	4.34763	0
4-Fluorobenzoylpropionic acid	366-77-8	WUYWHIAAQYQKPP-UHFFFAOYSA-N	91589	101359	OC(=O)CCC(=O)C1=CC=C(F)C=C1	C10H9FO3	196.18	1.26	1.49846	-1.22	-1.81949	-1
4-Formyl-antipyrine	950-81-2	QFYZFYDOEJZMDX-UHFFFAOYSA-N	63552, 85346	70371, 94579	Cc1c(C=O)c(=O)n(-c2ccccc2)n1C	C12H12N2O2	216.24	0.05	0.647599	0.05	0.647599	0
4-Hydroxybenzotriazole	26725-51-9	JMTMSDXUXJISAY-UHFFFAOYSA-N	10607767	2759291	Oc1cccc2[nH]nnc12	C6H5N3O	135.13	1.09	0.997717	0.99	0.821425	-0.34
4-Hydroxyquinoline	611-36-9	PMZDQRJGMBOQBF-UHFFFAOYSA-N	62357	69141	OC1=CC=NC2=CC=CC=C12	C9H7NO	145.16	2.1	1.82734	-0.28	1.82707	0
4-Hydroxytamoxifen	68392-35-8	TXUZVZSFRXZGTL-UHFFFAOYSA-N	56752	63062	CCC(=C(C1=CC=C(O)C=C1)C1=CC=C(OCCN(C)C)C=C1)C1=CC=CC=C1	C26H29NO2	387.53	6.44	5.69408	4.77	4.66725	0.94
4-Isopropylaniline	99-88-7	LRTFPLFDLJYEKT-UHFFFAOYSA-N	10670427, 14148778, 616466	707035	CC(C)c1ccc(N)cc1	C9H13N	135.21	2.24	2.38933	2.24	2.38805	0
4-Methylanisole	104-93-8	CHLICZRVGGXEOD-UHFFFAOYSA-N	13865438	7731	COc1ccc(C)cc1	C8H10O	122.17	2.7	2.329	2.7	2.329	0
4-Methylbenzylidene camphor	36861-47-9	HEOCBCNFKCOKBX-KAMYIIQDNA-N	4939160	6440721	Cc1ccc(C=C2C3CCC(C)(C2=O)C3(C)C)cc1	C18H22O	254.38	4.76	5.12085	4.76	5.12085	0
4-Methylmorpholine-N-oxide	7529-22-8	LFTLOKWAGJYHHR-UHFFFAOYSA-N	74032	82029	CN1(=O)CCOCC1	C5H11NO2	117.15	-3.09	-1.15271	-3.09	-1.15271	0
4-n-Nonylphenol	104-40-5	IGFHQQFPSIBGKE-UHFFFAOYSA-N	1688	1752	CCCCCCCCCc1ccc(O)cc1	C15H24O	220.36	6.13	5.73965	6.13	5.73912	0
4-n-Octylphenol	1806-26-4	NTDQQZYCCIDJRK-UHFFFAOYSA-N	14958	15730	CCCCCCCCc1ccc(O)cc1	C14H22O	206.33	5.47	5.29508	5.47	5.29455	0
4-Nitrophenol	100-02-7	BTJIUGUIPKRLHP-UHFFFAOYSA-N	955	980	OC1=CC=C(C=C1)[N+]([O-])=O	C6H5NO3	139.11	1.71	1.60966	1.51	1.12304	-0.68
4'-Aminoacetanilide	122-80-5	CHMBIJAOCISYEW-UHFFFAOYSA-N	10297844	31230	CC(=O)Nc1ccc(N)cc1	C8H10N2O	150.18	0.29	0.38203	0.29	0.381842	0
5-Carboline	244-69-9	RDMFHRSPDKWERA-UHFFFAOYSA-N	115684	130802	N1C2=C(C=CC=C2)C2=C1C=CN=C2	C11H8N2	168.2	2.65	1.87321	1.44	1.25977	0.84
5-Fluorouracil	51-21-8	GHASVSINZRGABV-UHFFFAOYSA-N	13932199, 3268	3385	Fc1c[nH]c(=O)[nH]c1=O	C4H3FN2O2	130.08	-0.57	-0.655848	-1.24	-1.07503	-0.63
5-Methyl-1H-benzotriazole	136-85-6	LRUDIIUSNGCQKF-UHFFFAOYSA-N	13341958, 14602167, 14815011, 8381	8705	Cc1ccc2[nH]nnc2c1	C7H7N3	133.15	1.71	1.8147	1.7	1.80013	-0.03
6-Mercaptopurine	6112-76-1	GLVAUDGFNGKCSF-UHFFFAOYSA-N	580869	667490	S=C1N=CNC2=C1NC=N2	C5H4N4S	152.17	0.09	-0.121789	0.09	-0.125387	0.99
6-Propyl-2-thiouracil	51-52-5	KNAHARQHSZJURB-UHFFFAOYSA-N	571424	657298	CCCC1=CC(=O)NC(=S)N1	C7H10N2OS	170.23	0.46	1.20374	0.41	1.12397	-0.17
6:2 Fluorotelomer sulfonic acid	2845-62-7	VIONGDJUYAYOPU-UHFFFAOYSA-N	106865	119688	OS(=O)(=O)CCC(F)(F)C(F)(F)C(F)(F)C(F)(F)C(F)(F)C(F)(F)F	C8H5F13O3S	428.17	2.5	3.92043	-1	1.54403	-1
7-(Ethylamino)-4-methylcoumarin	28821-18-3	OTNIKUTWXUODJZ-UHFFFAOYSA-N	107184	120061	CCNC1=CC=C2C(C)=CC(=O)OC2=C1	C12H13NO2	203.24	2.42	1.91234	2.42	1.91202	0
7-Amino-4-methylcoumarin	26093-31-2	GLNDAGDHSLMOKX-UHFFFAOYSA-N	83285	92249	CC1=CC(=O)OC2=CC(N)=CC=C12	C10H9NO2	175.19	1.34	1.25383	1.34	1.25379	0
7-Diethylamino-4-methylcoumarin	91-44-1	AFYCEAFSNDLKSX-UHFFFAOYSA-N	6783	7050	CCN(CC)C1=CC=C2C(C)=CC(=O)OC2=C1	C14H17NO2	231.3	3.34	2.90441	3.34	2.90409	0
7-Hydroxymethotrexat	5939-37-7	HODZDDDNGRLGSI-NSHDSACASA-N	4532295	5385077	CN(Cc1nc2c(N)nc(N)nc2nc1O)c1ccc(cc1)C(=O)N[C@@H](CCC(O)=O)C(O)=O	C20H22N8O6	470.45	-0.69	0.066524	-5.18	-6.28895	-2.04
Abamectin	71751-41-2	RRZXIRBKKLTSOM-XPNPUAGNSA-N	10286553	6434889	CC[C@H](C)[C@H]1O[C@@]2(C[C@@H]3C[C@@H](C\C=C(C)\[C@@H](O[C@H]4C[C@H](OC)[C@@H](O[C@H]5C[C@H](OC)[C@@H](O)[C@H](C)O5)[C@H](C)O4)[C@@H](C)\C=C\C=C4/CO[C@@H]5[C@H](O)C(C)=C[C@@H](C(=O)O3)[C@]45O)O2)C=C[C@@H]1C	C48H72O14	873.08	5.94	5.84843	5.94	5.84843	0
Acesulfame	33665-90-6	YGCFIWIQZPHFLU-UHFFFAOYSA-N	33607	36573	CC1=CC(=O)NS(=O)(=O)O1	C4H5NO4S	163.15	-0.77	-0.551528	-2.77	-1.49433	-1
Acetaminophen	103-90-2	RZVAJINKPMORJF-UHFFFAOYSA-N	1906	1983	CC(=O)Nc1ccc(O)cc1	C8H9NO2	151.17	0.4	0.907391	0.4	0.903684	-0.01
Acetamiprid	135410-20-7	WCXDHFDTOYPNIE-UHFFFAOYSA-N	21130168	213021	CN(CC1=CC=C(Cl)N=C1)C(C)=NC#N	C10H11ClN4	222.68	1.06	1.11434	1.06	1.11409	0
Acetochlor	34256-82-1	VTNQPKFIQCLBDU-UHFFFAOYSA-N	1911	1988	CCOCN(C(=O)CCl)C1=C(C)C=CC=C1CC	C14H20ClNO2	269.77	2.99	3.50371	2.99	3.50371	0
Acetyl-sulfamethoxazole	21312-10-7	GXPIUNZCALHVBA-UHFFFAOYSA-N	58771	65280	CC(=O)Nc1ccc(cc1)S(=O)(=O)Nc1cc(C)on1	C12H13N3O4S	295.31	1.06	0.857186	0.04	0.00310929	-0.97
Acrylamide	79-06-1	HRPVXLWXLXDGHG-UHFFFAOYSA-N	11527203, 6331	6579	NC(=O)C=C	C3H5NO	71.08	-0.67	-0.273995	-0.67	-0.273995	0
Acyclovir	59277-89-3	MKUXAQIIEYXACX-UHFFFAOYSA-N	1945	2022	NC1=NC2=C(N=CN2COCCO)C(=O)N1	C8H11N5O3	225.21	-1.45	-1.54957	-1.45	-1.55024	0
Albendazole	54965-21-8	HXHWSAZORRCQMX-UHFFFAOYSA-N	1998	2082	CCCSC1=CC2=C(NC(NC(=O)OC)=N2)C=C1	C12H15N3O2S	265.33	3.11	3.20452	3.09	3.20226	0
Allethrin	584-79-2	ZCVAOQKBXKSDMS-UHFFFAOYNA-N	10958	11442	CC(C)=CC1C(C(=O)OC2CC(=O)C(CC=C)=C2C)C1(C)C	C19H26O3	302.42	5.05	4.05619	5.05	4.05619	0
Amantadine	768-94-5	DKNWSYNQZKUICI-UHFFFAOYSA-N	11281783, 13441903, 2045	2130	NC12CC3CC(CC(C3)C1)C2	C10H17N	151.25	2.54	1.46595	-0.47	-1.38374	1
Ambrettolide	123-69-3	NVIPUOMWGQAOIT-RQOWECAXSA-N	4517661	5365703	O=C1CCCCC\C=C/CCCCCCCCO1	C16H28O2	252.4	5.59	5.12245	5.59	5.12245	0
Ambroxol	18683-91-5	JBDGDEWWOUBZPM-UHFFFAOYSA-N	2047	2132	NC1=C(CNC2CCC(O)CC2)C=C(Br)C=C1Br	C13H18Br2N2O	378.11	2.7	2.65273	0.94	1.04122	0.98
Amcinonide	51022-69-6	ILKJAFIWWBXGDU-QFUJLNQESA-N	392009	443958	[H][C@@]12C[C@H]3OC4(CCCC4)O[C@@]3(C(=O)COC(C)=O)[C@@]1(C)C[C@H](O)[C@@]1(F)[C@@]2([H])CCC2=CC(=O)C=C[C@]12C	C28H35FO7	502.58	3.56	3.19526	3.56	3.19526	0
Ametryn	834-12-8	RQVYBGPQFYCBGX-UHFFFAOYSA-N	12705	13263	CCNc1nc(NC(C)C)nc(SC)n1	C9H17N5S	227.33	3.04	2.59605	3.04	2.58673	0.02
Amidosulfobetaine-14	216667-08-2	UTSXERRKRAEDOV-UHFFFAOYSA-O	3263002	4046965	CCCCCCCCCCCCCC(=O)NCCC[N+](C)(C)CCCS(O)(=O)=O	C22H47N2O4S	436.7	-0.95	1.41216	-0.35	1.8043	-1
Amidosulfuron	120923-37-7	CTTHWASMBLQOFR-UHFFFAOYSA-N	82874	91777	COC1=CC(OC)=NC(N=C(O)NS(=O)(=O)N(C)S(C)(=O)=O)=N1	C9H15N5O7S2	369.37	-1.44	-0.131369	-4.78	-4.08585	-1.72
Amiodarone	1951-25-3	IYIKLHRQXLHMJQ-UHFFFAOYSA-N	2072	2157	CCCCc1oc2ccccc2c1C(=O)c1cc(I)c(OCCN(CC)CC)c(I)c1	C25H29I2NO3	645.32	7.36	7.63542	5.06	6.53448	0.92
Amitraz	33089-61-1	QXAITBQSYVNQDR-ZIOPAAQOSA-N	33405, 21229841	36324	CN(\C=N\c1ccc(C)cc1C)\C=N\c1ccc(C)cc1C	C19H23N3	293.42	5.26	5.4112	5.26	3.27517	1.83
Amitriptyline	50-48-6	KRMDCWKBEZIMAB-UHFFFAOYSA-N	2075	2160	CN(C)CCC=C1c2ccccc2CCc2ccccc12	C20H23N	277.41	4.72	4.80954	2.59	2.47724	1
Amitrole	61-82-5	KLSJWNVTNUYHDU-UHFFFAOYSA-N	1577	1639	NC1=NC=NN1	C2H4N4	84.08	-0.92	-0.553766	-0.92	-0.558258	-0.01
Amoxicillin	26787-78-0	LSQZJLSUYDQPKJ-NJBDSQKTSA-N	31006	33613	CC1(C)S[C@@H]2[C@H](NC(=O)[C@H](N)C3=CC=C(O)C=C3)C(=O)N2[C@H]1C(O)=O	C16H19N3O5S	365.41	0.48	-2.30807	-2.47	-2.66776	-0.61
Anastrozole	120511-73-1	YBBLVLTVTVSKRW-UHFFFAOYSA-N	2102	2187	CC(C)(C#N)C1=CC(=CC(CN2C=NC=N2)=C1)C(C)(C)C#N	C17H19N5	293.37	2.68	3.02845	2.68	3.02845	0
Androsterone	53-41-8	QGXBDMJGAMFCBF-HLUDHZFRSA-N	5668	5879	C[C@]12CC[C@H]3[C@@H](CC[C@H]4C[C@H](O)CC[C@]34C)[C@@H]1CCC2=O	C19H30O2	290.45	3.69	3.76728	3.69	3.76728	0
Aniline	62-53-3	PAYRUJLWNCNPSJ-UHFFFAOYSA-N	5889	6115	NC1=CC=CC=C1	C6H7N	93.13	1.17	1.14432	1.17	1.14357	0
Anthranilic acid	118-92-3	RWZYAGGXGHYGMB-UHFFFAOYSA-N	222	227	NC1=CC=CC=C1C(O)=O	C7H7NO2	137.14	1.46	1.4519	-0.99	-1.14801	-1
Atenolol	29122-68-7	METKIMKYRPQLGS-UHFFFAOYNA-N	2162	2249	CC(C)NCC(O)COc1ccc(CC(N)=O)cc1	C14H22N2O3	266.34	0.24	0.425025	-2.19	-1.80021	0.99
Atorvastatin	134523-00-5	XUKUURHRXDUEBC-UHFFFAOYNA-N	54810	60823	CC(C)c1c(C(=O)Nc2ccccc2)c(c(-c2ccc(F)cc2)n1CCC(O)CC(O)CC(O)=O)-c1ccccc1	C33H35FN2O5	558.66	4.36	5.38715	1.59	2.44475	-1
Atrazine	1912-24-9	MXWJVTOOROXGIU-UHFFFAOYSA-N	2169	2256	CCNc1nc(Cl)nc(NC(C)C)n1	C8H14ClN5	215.69	2.66	2.1976	2.66	2.19757	0
Azelastine	58581-89-8	MBUVEWMHONZEQD-UHFFFAOYNA-N	2180	2267	CN1CCCC(CC1)n1nc(Cc2ccc(Cl)cc2)c2ccccc2c1=O	C22H24ClN3O	381.91	4.3	4.04126	2.04	2.55461	0.97
Azinphos methyl	86-50-0	CJJOSEISRRTUQB-UHFFFAOYSA-N	2181	2268	COP(=S)(OC)SCN1N=NC2=CC=CC=C2C1=O	C10H12N3O3PS2	317.32	3.01	3.24477	3.01	3.24477	0
Azithromycin	83905-01-5	MQTOSJVFKKJCRP-UHFFFAOYNA-N	49833	55185, 44317861	CCC1OC(=O)C(C)C(OC2CC(C)(OC)C(O)C(C)O2)C(C)C(OC2OC(C)CC(C2O)N(C)C)C(C)(O)CC(C)CN(C)C(C)C(O)C1(C)O	C38H72N2O12	749	3.29	2.44478	0.65	-1.23094	1.96
Azoxystrobin	131860-33-8	WFDXOXNFNRHQEC-GHRIWEEISA-N	2298772	3034285	COC=C(C(=O)OC)c1ccccc1Oc1cc(Oc2ccccc2C#N)ncn1	C22H17N3O5	403.4	3.54	4.22475	3.54	4.22475	0
Benalaxyl	71626-11-4	CJPQIRJHIZUAQP-INIZCTEOSA-N	4590491	5491362	COC(=O)[C@H](C)N(C(=O)CC1=CC=CC=C1)C1=C(C)C=CC=C1C	C20H23NO3	325.41	3.96	4.12885	3.96	4.12885	0
Bendiocarb	22781-23-3	XEGGRYVFLWGFHI-UHFFFAOYSA-N	2224	2314	CNC(=O)Oc1cccc2OC(C)(C)Oc12	C11H13NO4	223.23	1.85	1.57147	1.85	1.57147	0
Bentazone	25057-89-0	ZOMSMJKLGFBRBS-UHFFFAOYSA-N	2238	2328	CC(C)N1C(=O)c2ccccc2NS1(=O)=O	C10H12N2O3S	240.28	2.04	0.756927	0.05	-0.186003	-1
Benzenesulfonic acid	98-11-3	SRSXLGNVWSONIS-UHFFFAOYSA-N	7093	7371	OS(=O)(=O)c1ccccc1	C6H6O3S	158.17	-0.14	1.15415	-3.64	-1.22225	-1
Benzethonium	121-54-0	SIYLLGKDQZGJHK-UHFFFAOYSA-N	2245	8478	CC(C)(C)CC(C)(C)c1ccc(OCCOCC[N+](C)(C)Cc2ccccc2)cc1	C27H42NO2	413.65	2.25	2.37064	2.25	2.37064	0
Benzocain	94-09-7	BLFLLBZGZJTVJG-UHFFFAOYSA-N	13854242	2337	CCOC(=O)C1=CC=C(N)C=C1	C9H11NO2	165.19	1.83	1.5046	1.83	1.50459	0
Benzophenone-3	131-57-7	DXGLGDHPHMLXJC-UHFFFAOYSA-N	4471	4632	COc1ccc(C(=O)c2ccccc2)c(O)c1	C14H12O3	228.25	3.88	3.62136	3.77	3.13405	-0.68
Benzophenone-4	4065-45-6	CXVGEDCSTKKODG-UHFFFAOYSA-N	18829	18829	COc1cc(O)c(cc1S(O)(=O)=O)C(=O)c1ccccc1	C14H12O6S	308.31	0.88	2.80227	-3.33	-0.439155	-1.87
Benzothiazole	95-16-9	IOJUPLGTWVMSFF-UHFFFAOYSA-N	10619740, 10758434, 87200	96588	c1nc2ccccc2s1	C7H5NS	135.18	2.09	2.11347	2.09	2.11347	0
Benzyl benzoate	120-51-4	SESFRYSPDFLNCH-UHFFFAOYSA-N	13856959	2345	O=C(OCC1=CC=CC=C1)C1=CC=CC=C1	C14H12O2	212.25	3.59	3.7012	3.59	3.7012	0
Benzyl-2-naphthylether	613-62-7	WLTCCDHHWYAMCG-UHFFFAOYSA-N	109701	123080	C(Oc1ccc2ccccc2c1)c1ccccc1	C17H14O	234.3	4.79	4.52952	4.79	4.52952	0
Benzyldimethyldodecylammonium	139-07-1	CYDRXTMLKJDRQH-UHFFFAOYSA-N	8424	8754	CCCCCCCCCCCC[N+](C)(C)Cc1ccccc1	C21H38N	305.55	2.43	2.63275	2.43	2.63275	0
Benzyldimethylhexadecylammonium	122-18-9	QDYLMAYUEZBUFO-UHFFFAOYSA-N	28943	31202	CCCCCCCCCCCCCCCC[N+](C)(C)Cc1ccccc1	C25H46N	361.66	3.67	4.41103	3.67	4.41103	0
Bethamethasone	378-44-9	UREBDLICKHMUKA-MYIYBPPFSA-N	9399	9782	[H][C@@]12C[C@H](C)[C@](O)(C(=O)CO)[C@@]1(C)C[C@H](O)[C@@]1(F)[C@@]2([H])CCC2=CC(=O)C=C[C@]12C	C22H29FO5	392.47	1.92	1.68157	1.92	1.68157	0
Bezafibrate	41859-67-0	IIBYAHWJQTYFKB-UHFFFAOYSA-N	35728	39042	CC(C)(Oc1ccc(CCNC(=O)c2ccc(Cl)cc2)cc1)C(O)=O	C19H20ClNO4	361.83	3.48	3.98658	0.05	0.737674	-1
Bicalutamide	90357-06-5	LKJPYSCBVHEWIU-UHFFFAOYNA-N	2284	2375	CC(O)(CS(=O)(=O)C1=CC=C(F)C=C1)C(=O)NC1=CC(=C(C=C1)C#N)C(F)(F)F	C18H14F4N2O4S	430.38	2.53	2.7093	2.53	2.70928	0
Bifenox free acid	53774-07-5	IUSYSZLVZMUVDO-UHFFFAOYSA-N	131044	148653	OC(=O)C1=C(C=CC(OC2=C(Cl)C=C(Cl)C=C2)=C1)[N+]([O-])=O	C13H7Cl2NO5	328.11	4.57	4.27919	1.43	0.751069	-1
Bifonazol	60628-96-8	OCAPBUJLXMYKEJ-UHFFFAOYNA-N	2287	2378	C1=CN(C=N1)C(C1=CC=CC=C1)C1=CC=C(C=C1)C1=CC=CC=C1	C22H18N2	310.4	5.23	5.23439	5.1	5.17879	0.16
Bis(2-ethylhexyl)phosphate	298-07-7	SEGLCEQVOFDUPX-UHFFFAOYNA-N	8918	9275	CCCCC(CC)COP(O)(=O)OCC(CC)CCCC	C16H35O4P	322.43	5.13	5.78097	1.63	3.40493	-1
Bis(4-chlorophenyl)sulfone	80-07-9	GPAPPPVRLPGFEQ-UHFFFAOYSA-N	6373	6625	Clc1ccc(cc1)S(=O)(=O)c1ccc(Cl)cc1	C12H8Cl2O2S	287.16	3.73	4.13617	3.73	4.13617	0
Bisoprolol	66722-44-9	VHYCDWMUTMEGQY-UHFFFAOYNA-N	2312	2405	CC(C)NCC(O)COc1ccc(COCCOC(C)C)cc1	C18H31NO4	325.45	2.21	2.1964	-0.22	-0.0288353	0.99
Bisphenol A	80-05-7	IISBACLAFKSPIT-UHFFFAOYSA-N	13757362, 6371	6623	CC(C)(c1ccc(O)cc1)c1ccc(O)cc1	C15H16O2	228.29	3.63	4.04498	3.63	4.04317	-0.01
Bisphenol B	77-40-7	HTVITOHKHWFJKO-UHFFFAOYSA-N	59553	66166	CCC(C)(C1=CC=C(O)C=C1)C1=CC=C(O)C=C1	C16H18O2	242.32	3.92	4.48954	3.92	4.48771	-0.01
Bisphenol BP	1844-01-5	BATCUENAARTUKW-UHFFFAOYSA-N	203015	232881	OC1=CC=C(C=C1)C(C1=CC=CC=C1)(C1=CC=CC=C1)C1=CC=C(O)C=C1	C25H20O2	352.44	5.32	6.31258	5.32	6.30983	-0.01
Bisphenol C	79-97-0	YMTYZTXUZLQUSF-UHFFFAOYSA-N	6368	6620	CC1=CC(=CC=C1O)C(C)(C)C1=CC=C(O)C(C)=C1	C17H20O2	256.35	4.16	5.07182	4.16	5.07103	0
Bisphenol E	2089-08-05	HCNHNBLSNVSJTJ-UHFFFAOYSA-N	528599	608116	CC(C1=CC=C(O)C=C1)C1=CC=C(O)C=C1	C14H14O2	214.27	2.98	3.74493	2.98	3.74325	-0.01
Bisphenol F	620-92-8	PXKLMJQFEQBVLD-UHFFFAOYSA-N	11614	12111	Oc1ccc(Cc2ccc(O)cc2)cc1	C13H12O2	200.24	2.9	3.45791	2.9	3.45634	-0.01
Bisphenol S	80-09-1	VPWNQTHUCYMVMZ-UHFFFAOYSA-N	15675851, 6374	6626	Oc1ccc(cc1)S(=O)(=O)c1ccc(O)cc1	C12H10O4S	250.27	1.81	2.32095	1.78	1.98467	-0.81
Bisphenol Z	843-55-0	SDDLEVPIDBLVHC-UHFFFAOYSA-N	202599	232446	OC1=CC=C(C=C1)C1(CCCCC1)C1=CC=C(O)C=C1	C18H20O2	268.36	4.14	4.91496	4.14	4.91307	-0.01
Boscalid	188425-85-6	WYEMLYFITZORAB-UHFFFAOYSA-N	184713	213013	Clc1ccc(cc1)-c1ccccc1NC(=O)c1cccnc1Cl	C18H12Cl2N2O	343.21	4.69	4.92295	4.69	4.92294	0
Bosentan	147536-97-8	GJPICJJJRGTNOD-UHFFFAOYSA-N	94651	104865	COC1=CC=CC=C1OC1=C(NS(=O)(=O)C2=CC=C(C=C2)C(C)(C)C)N=C(N=C1OCCO)C1=NC=CC=N1	C27H29N5O6S	551.62	3.53	4.94175	1.53	3.97646	-0.98
Bromochlorophen	15435-29-7	TYBHZVUFOINFDV-UHFFFAOYSA-N	76597	84907	OC1=C(Br)C=C(Cl)C=C1CC1=CC(Cl)=CC(Br)=C1O	C13H8Br2Cl2O2	426.92	6.22	6.2035	6.11	4.74708	-0.98
Bromoxynil	1689-84-5	UPMXNNIRAGDFEH-UHFFFAOYSA-N	14775	15531	Oc1c(Br)cc(cc1Br)C#N	C7H3Br2NO	276.92	3.14	3.06328	0.97	1.19083	-0.99
Budesonide	51333-22-3	VOVIALXJUBGFJZ-JXMPGWGJSA-N	36566	40000	[H][C@@]12C[C@@]3([H])[C@]4([H])CCC5=CC(=O)C=C[C@]5(C)[C@@]4([H])[C@@H](O)C[C@]3(C)[C@@]1(O[C@H](CCC)O2)C(=O)CO	C25H34O6	430.55	3.02	2.73389	3.02	2.73389	0
Bupirimate	41483-43-6	DSKJPMWIHSOYEA-UHFFFAOYSA-N	35588	38884	CCCCC1=C(C)N=C(NCC)N=C1OS(=O)(=O)N(C)C	C13H24N4O3S	316.42	2.64	2.22466	2.64	2.22462	0
Bupropion	34911-55-2	SNPPWIUOZRMYNY-UHFFFAOYNA-N	431	444	CC(NC(C)(C)C)C(=O)c1cccc(Cl)c1	C13H18ClNO	239.75	3.08	3.26611	2.69	2.39019	0.87
Butylparaben	94-26-8	QFOHBWFCKVYLES-UHFFFAOYSA-N	9610352	11435488	CCCCOC(=O)c1ccc(O)cc1	C11H14O3	194.23	3.18	2.99706	3.15	2.9641	-0.07
Caffeine	58-08-2	RYYVLZVUVIJVGH-UHFFFAOYSA-N	2424	2519	Cn1cnc2n(C)c(=O)n(C)c(=O)c12	C8H10N4O2	194.19	0.28	-0.545646	0.28	-0.545646	0
Candesartan	70321-86-7	HTQMVQVXFRQIKW-UHFFFAOYSA-N	2445	2541	CCOC1=NC2=CC=CC(C(O)=O)=C2N1CC1=CC=C(C=C1)C1=CC=CC=C1C1=NN=NN1	C24H20N6O3	440.46	4.15	4.67641	0.09	-0.296459	-2
Canrenone	976-71-6	UJVLDDZCTMKXJK-AFDHUMPMSA-N	282625	319260	CC12CC[C@H]3C(C=CC4=CC(=O)CCC34C)[C@@H]1CCC21CCC(=O)O1	C22H28O3	340.47	2.5	3.5954	2.5	3.5954	0
Captopril	62571-86-2	FAKRSMQSSFJEIM-RQJHMYQMSA-N	40130	44093	C[C@H](CS)C(=O)N1CCC[C@H]1C(O)=O	C9H15NO3S	217.28	0.62	0.726921	-2.59	-2.42218	-1
Carbamazepine	298-46-4	FFGPTBGBLSHEPO-UHFFFAOYSA-N	2457	2554	NC(=O)N1c2ccccc2C=Cc2ccccc12	C15H12N2O	236.28	2.28	2.76603	2.28	2.76603	0
Carbaryl	63-25-2	CVXBEEMKQHEXEN-UHFFFAOYSA-N	5899	6129	CNC(=O)OC1=C2C=CC=CC2=CC=C1	C12H11NO2	201.23	2.44	2.46011	2.44	2.46011	0
Carbendazim	10605-21-7	TWFZGCMQGLPBSX-UHFFFAOYSA-N	23741	25429	COC(=O)Nc1nc2ccccc2[nH]1	C9H9N3O2	191.19	1.62	1.80076	1.58	1.79853	0
Carboline	244-76-8	BPMFPOGUJAAYHL-UHFFFAOYSA-N	60810	67486	N1C2=C(C=CC=C2)C2=C1N=CC=C2	C11H8N2	168.2	2.93	2.24068	2.93	2.24067	0
Cashmeran	33704-61-9	MIZGSAALSYARKU-UHFFFAOYNA-N	83324	92292	CC1C(C)(C)C2=C(C(=O)CCC2)C1(C)C	C14H22O	206.33	4.06	3.56692	4.06	3.56692	0
Celecoxib	169590-42-5	RZEKVGVHFLEQIL-UHFFFAOYSA-N	2562	2662	CC1=CC=C(C=C1)C1=CC(=NN1C1=CC=C(C=C1)S(N)(=O)=O)C(F)(F)F	C17H14F3N3O2S	381.37	3.24	4.00944	3.24	4.00925	0
Celestolide	13171-00-1	IKTHMQYJOWTSJO-UHFFFAOYSA-N	55495	61585	CC(=O)c1cc(cc2c1CCC2(C)C)C(C)(C)C	C17H24O	244.38	5.31	4.6707	5.31	4.6707	0
Cetirizine	83881-51-0	ZKLPARSLTMPFCP-UHFFFAOYNA-N	2577	2678	OC(=O)COCCN1CCN(CC1)C(c1ccccc1)c1ccc(Cl)cc1	C21H25ClN2O3	388.9	2.52	0.859809	-0.31	0.733885	-0.57
Chlorfenvinphos	470-90-6	FSAVDKDHPDSCTO-XYOKQWHBSA-N	4526760	5377784	CCOP(=O)(OCC)OC(=CCl)c1ccc(Cl)cc1Cl	C12H14Cl3O4P	359.58	3.94	4.29736	3.94	4.29736	0
Chloridazon	1698-60-8	WYKYKTKDBLFHCY-UHFFFAOYSA-N	14790	15546	Nc1cnn(-c2ccccc2)c(=O)c1Cl	C10H8ClN3O	221.65	0.92	1.10544	0.92	1.10544	0
Chlormequat	7003-89-6	JUZXDNPBRPUIOR-UHFFFAOYSA-N	13237	13237	C[N+](C)(C)CCCl	C5H13ClN	123.63	-3.04	-3.30768	-3.04	-3.30768	0
Chlorophene	120-32-1	NCKMMSIFQUPKCK-UHFFFAOYSA-N	8118	8425	Oc1ccc(Cl)cc1Cc1ccccc1	C13H11ClO	218.68	4.31	4.36552	4.31	4.35607	-0.02
Chlorothalonil-4-hydroxy	28343-61-5	MDQKYGOECVSPIW-UHFFFAOYSA-N	31530	34217	Oc1c(Cl)c(Cl)c(C#N)c(Cl)c1C#N	C8HCl3N2O	247.47	3.46	3.19401	0.31	1.20169	-1
Chlorotoluron	15545-48-9	JXCGFZXSOMJFOA-UHFFFAOYSA-N	25472	27375	CN(C)C(=O)Nc1ccc(C)c(Cl)c1	C10H13ClN2O	212.68	2.48	2.44223	2.48	2.44223	0
Chloroxuron	1982-47-4	IVUXTESCPZUGJC-UHFFFAOYSA-N	15299	16115	CN(C)C(=O)Nc1ccc(Oc2ccc(Cl)cc2)cc1	C15H15ClN2O2	290.75	3.26	3.42909	3.26	3.42909	0
Chlorpropham	101-21-3	CWJSHJJYOPWUGX-UHFFFAOYSA-N	2627	2728	CC(C)OC(=O)NC1=CC(Cl)=CC=C1	C10H12ClNO2	213.67	3.32	3.20767	3.32	3.20767	0
Ciclopirox	41621-49-2	SCKYRAXSEDYPSA-UHFFFAOYSA-N	2647	2749	CC1=CC(=O)N(O)C(=C1)C1CCCCC1	C12H17NO2	207.27	1.87	2.21659	1.05	1.55916	-0.78
Ciprofloxacin	85721-33-1	MYSWGUAQZAJSOK-UHFFFAOYSA-N	2662	2764, 4011971	OC(=O)c1cn(C2CC2)c2cc(N3CCNCC3)c(F)cc2c1=O	C17H18FN3O3	331.35	-0.3	-0.814596	-2.27	-0.814533	-0.01
Citalopram	59729-33-8	WSEQXVZVJXJVFP-UHFFFAOYNA-N	2669	2771	CN(C)CCCC1(OCc2cc(ccc12)C#N)c1ccc(F)cc1	C20H21FN2O	324.4	3.39	3.7643	0.93	1.40955	1
Clarithromycin	81103-11-9	AGOYDEPGAOXOCK-UHFFFAOYNA-N	10342604	84029	CCC1OC(=O)C(C)C(OC2CC(C)(OC)C(O)C(C)O2)C(C)C(OC2OC(C)CC(C2O)N(C)C)C(C)(CC(C)C(=O)C(C)C(O)C1(C)O)OC	C38H69NO13	747.97	3.12	3.23952	2.03	2.21639	0.91
Climbazole	38083-17-9	OWEGWHBOCFMBLP-UHFFFAOYNA-N	34752	37907	CC(C)(C)C(=O)C(OC1=CC=C(Cl)C=C1)N1C=CN=C1	C15H17ClN2O2	292.77	3.33	4.33505	3.31	4.29815	0.11
Clobetasol	25122-41-2	FCSHDIVRCWTZOX-MYIYBPPFSA-N	4470588	5311051	[H][C@@]12C[C@H](C)[C@](O)(C(=O)CCl)[C@@]1(C)C[C@H](O)[C@@]1(F)[C@@]2([H])CCC2=CC(=O)C=C[C@]12C	C22H28ClFO4	410.92	2.74	3.03616	2.74	3.03616	0
Clofibrate	637-07-0	KNHUKKLJHYUCFP-UHFFFAOYSA-N	2694	2796	CCOC(=O)C(C)(C)OC1=CC=C(Cl)C=C1	C12H15ClO3	242.7	3.52	3.40183	3.52	3.40183	0
Clofibric acid	882-09-7	TXCGAZHTZHNUAI-UHFFFAOYSA-N	5315095	6941548	CC(C)(Oc1ccc(Cl)cc1)C(O)=O	C10H11ClO3	214.65	2.74	2.89913	-0.74	-0.51076	-1
Clomazone	81777-89-1	KIEDNEWSYUYDSN-UHFFFAOYSA-N	49469	54778	CC1(C)CON(Cc2ccccc2Cl)C1=O	C12H14ClNO2	239.7	2.36	2.93403	2.36	2.93403	0
Clonidine	4205-90-7	GJSURZIOUXUGAL-UHFFFAOYSA-N	2701	2803	ClC1=CC=CC(Cl)=C1NC1=NCCN1	C9H9Cl2N3	230.1	1.8	2.48509	0.72	1.66166	0.85
Clopidogrel	90055-48-4	GKTWGGQPFAXNFI-UHFFFAOYNA-N	2704	2806	COC(=O)C(N1CCC2=C(C1)C=CS2)C1=CC=CC=C1Cl	C16H16ClNO2S	321.82	4.21	4.03176	4.21	4.03112	0
Clopyralid	1702-17-6	HUBANNPOLNYSAD-UHFFFAOYSA-N	14797	15553	OC(=O)C1=C(Cl)C=CC(Cl)=N1	C6H3Cl2NO2	192	1.8	2.22727	-1.34	-1.23512	-1
Clothianidin	210880-92-5	PGOOBECODWQEAB-UHFFFAOYSA-N	184723	213027	CN=C(NCC1=CN=C(Cl)S1)N[N+]([O-])=O	C6H8ClN5O2S	249.68	0.23	-0.581771	0.12	-3.10865	0
Clotrimazole	23593-75-1	VNFPBHJOKIVQEB-UHFFFAOYSA-N	2710	2812	Clc1ccccc1C(c1ccccc1)(c1ccccc1)n1ccnc1	C22H17ClN2	344.85	5.25	5.83945	5.2	5.7905	0.14
Clozapine	5786-21-0	QZUDBNBUXVUHMW-UHFFFAOYSA-N	10442628	NA	CN1CCN(CC1)C1=NC2=C(NC3=CC=CC=C13)C=CC(Cl)=C2	C18H19ClN4	326.83	3.11	3.40024	2.42	3.12307	0.47
Cortisone	53-06-5	MFYSYFVPBJMHGN-ZPOLXVRWSA-N	193441	222786	C[C@]12CC(=O)[C@H]3[C@@H](CCC4=CC(=O)CC[C@]34C)[C@@H]1CC[C@]2(O)C(=O)CO	C21H28O5	360.45	1.46	1.66068	1.46	1.66068	0
Cotinine	486-56-6	UIKROCXWUNQSPJ-VIFPVBQESA-N	395	408	CN1[C@@H](CCC1=O)c1cccnc1	C10H12N2O	176.22	0.17	0.210635	0.17	0.209681	0
Creatinine	60-27-5	DDRJAANPRJIHGJ-UHFFFAOYSA-N	568	588	CN1CC(=O)N=C1N	C4H7N3O	113.12	-1.47	-1.45942	-1.71	-1.4626	-0.01
Crotamiton	483-63-6	DNTGGZPQPQTDQF-XBXARRHUSA-N	599515	688020	CCN(C(=O)\C=C\C)c1ccccc1C	C13H17NO	203.29	2.35	3.08818	2.35	3.08818	0
Cyclamate	100-88-9	HCAJEUSONLESMK-UHFFFAOYSA-N	7252	7533	OS(=O)(=O)NC1CCCCC1	C6H13NO3S	179.24	-0.01	0.606519	-3.5	-1.76988	-1
Cyclohexylamine	108-91-8	PAFZNILMFXTMIY-UHFFFAOYSA-N	7677	7965	NC1CCCCC1	C6H13N	99.18	1.3	1.17381	-1.67	-1.56939	1
Cyclophosphamide	50-18-0	CMSMOCZEIVJLDB-UHFFFAOYNA-N	2804	2907	ClCCN(CCCl)P1(=O)NCCCO1	C7H15Cl2N2O2P	261.09	0.53	0.0965477	0.53	0.0965473	0
Cyproconazole	94361-06-5	UFNOUKDBUJZYDE-UHFFFAOYNA-N	248621	71296090, 282313	CC(C1CC1)C(O)(Cn1cncn1)c1ccc(Cl)cc1	C15H18ClN3O	291.78	2.95	2.8487	2.95	2.8487	0
Cyprodinil	88-85-7	HAORKNGNJCEJBX-UHFFFAOYSA-N	77885	86367	Cc1cc(nc(Nc2ccccc2)n1)C1CC1	C14H15N3	225.3	3.62	3.21098	3.62	3.21096	0
Cyproterone	2098-66-0	DUSHUSLJJMDGTE-FYVWWQHXSA-N	4447594	5284537	CC(=O)[C@@]1(O)CC[C@H]2[C@@H]3C=C(Cl)C4=CC(=O)[C@@H]5C[C@@H]5[C@]4(C)[C@H]3CC[C@]12C	C22H27ClO3	374.91	3.01	3.19773	3.01	3.19773	0
Cyromazine	66215-27-8	LVQDKIWDGQRHTE-UHFFFAOYSA-N	43550	47866	NC1=NC(NC2CC2)=NC(N)=N1	C6H10N6	166.19	0.24	0.172581	0.21	-0.793169	0.9
Daidzein	486-66-8	ZQSIJRDFPHDXIC-UHFFFAOYSA-N	4445025	5281708	Oc1ccc(cc1)-c1coc2cc(O)ccc2c1=O	C15H10O4	254.24	2.91	2.73044	2.62	1.77245	-0.92
DCOIT	64359-81-5	PORQOHRXAJJKGK-UHFFFAOYSA-N	82791	91688	CCCCCCCCN1SC(Cl)=C(Cl)C1=O	C11H17Cl2NOS	282.23	4.43	5.11427	4.43	5.11427	0
Decyl sulfate	142-98-3	CSMFSDCPJHNZRY-UHFFFAOYSA-N	8564	8904	CCCCCCCCCCOS(O)(=O)=O	C10H22O4S	238.34	3.31	3.52772	-0.19	1.15132	-1
DEET	134-62-3	MMOXZBCLCQITDF-UHFFFAOYSA-N	13986709, 4133	4284	CCN(CC)C(=O)c1cccc(C)c1	C12H17NO	191.28	2.24	2.49828	2.24	2.49828	0
Denatonium	3734-33-6	ZFQMTVNLDNXRNQ-UHFFFAOYSA-O	14735	15488	CC[N+](CC)(CC(=O)NC1=C(C)C=CC=C1C)CC1=CC=CC=C1	C21H29N2O	326.49	-0.71	0.40505	-0.71	0.405538	0
Desethylatrazine	6190-65-4	DFWFIQKMSFGDCQ-UHFFFAOYSA-N	21157	22563	CC(C)Nc1nc(N)nc(Cl)n1	C6H10ClN5	187.63	1.54	1.53909	1.54	1.53905	0
Desethylterbutylazine	30125-63-4	LMKQNTMFZLAJDV-UHFFFAOYSA-N	97278	108201	CC(C)(C)Nc1nc(N)nc(Cl)n1	C7H12ClN5	201.66	1.96	1.81967	1.96	1.81963	0
Desisopropylatrazine	1007-28-9	IVENSCMCQBJAKW-UHFFFAOYSA-N	13278	13878	CCNc1nc(N)nc(Cl)n1	C5H8ClN5	173.61	1.26	1.12251	1.26	1.12247	0
Desloratadine	100643-71-8	JAUOIFJMECXRGI-UHFFFAOYSA-N	110575	124087	Clc1ccc2c(CCc3cccnc3C2=C2CCNCC2)c1	C19H19ClN2	310.83	4.8	3.96854	1.93	1.6871	1
Desonide	638-94-8	WBGKWQHBNHJJPZ-LECWWXJVSA-N	4470603	5311066	CC1(C)O[C@@H]2C[C@H]3[C@@H]4CCC5=CC(=O)C=C[C@]5(C)[C@H]4[C@@H](O)C[C@]3(C)[C@@]2(O1)C(=O)CO	C24H32O6	416.52	2.79	1.90051	2.79	1.90051	0
Desoximetasone	382-67-2	VWVSBHGCDBMOOT-DVDQJVPNSA-N	4470604	5311067	[H][C@@]12C[C@@H](C)[C@H](C(=O)CO)[C@@]1(C)C[C@H](O)[C@@]1(F)[C@@]2([H])CCC2=CC(=O)C=C[C@]12C	C22H29FO4	376.47	2.3	2.35104	2.3	2.35104	0
Desphenyl chloridazon	6339-19-1	FEWPCPCEGBPTAL-UHFFFAOYSA-N	86506	95827	Nc1cn[nH]c(=O)c1Cl	C4H4ClN3O	145.55	-0.63	-0.776192	-0.63	-0.784787	-0.02
Dexamethasone	50-02-2	UREBDLICKHMUKA-CXSFZGCWSA-N	5541	5743	C[C@@H]1C[C@H]2[C@@H]3CCC4=CC(=O)C=C[C@]4(C)[C@@]3(F)[C@@H](O)C[C@]2(C)[C@@]1(O)C(=O)CO	C22H29FO5	392.47	1.92	1.68157	1.92	1.68157	0
Diatrizoate	117-96-4	YVPYQUNUQOZFHG-UHFFFAOYSA-N	2055	2140	CC(=O)Nc1c(I)c(NC(C)=O)c(I)c(C(O)=O)c1I	C11H9I3N2O4	613.92	2.15	2.89308	-1	-0.627878	-1
Diazepam	439-14-5	AAOVKJBEBIDNHE-UHFFFAOYSA-N	2908	3016	CN1c2ccc(Cl)cc2C(=NCC1=O)c1ccccc1	C16H13ClN2O	284.75	2.92	3.07609	2.92	3.07607	0
Diazinon	333-41-5	FHIVAFMUCKRCQO-UHFFFAOYSA-N	2909	3017	CCOP(=S)(OCC)Oc1cc(C)nc(n1)C(C)C	C12H21N2O3PS	304.35	3.8	4.19206	3.8	4.1918	0
Dibenzyl ether	103-50-4	MHDVGSVTJDSBDK-UHFFFAOYSA-N	21105876	7657	C(OCC1=CC=CC=C1)C1=CC=CC=C1	C14H14O	198.27	3.6	3.5735	3.6	3.5735	0
Dibutylhydroxytoluene	128-37-0	NLZUEZXRPGMBCV-UHFFFAOYSA-N	13835296	31404	Cc1cc(c(O)c(c1)C(C)(C)C)C(C)(C)C	C15H24O	220.36	5.07	5.27321	5.07	5.27319	0
Dichlorophen	97-23-4	MDNWOSOZYLHTCG-UHFFFAOYSA-N	2929	3037	OC1=CC=C(Cl)C=C1CC1=C(O)C=CC(Cl)=C1	C13H10Cl2O2	269.13	4.56	4.666	4.56	4.26796	-0.6
Dichlorprop	120-36-5	MZHCENGPTKEIGP-UHFFFAOYNA-N	8120	8427	CC(Oc1ccc(Cl)cc1Cl)C(O)=O	C9H8Cl2O3	235.07	3.06	3.07041	-0.49	-0.410005	-1
Dichlorvos	62-73-7	OEBRKCOSUFCWJD-UHFFFAOYSA-N	2931	3039	COP(=O)(OC)OC=C(Cl)Cl	C4H7Cl2O4P	220.98	1.28	1.37278	1.28	1.37278	0
Diclofenac	15307-86-5	DCOPUUMXTXDBNB-UHFFFAOYSA-N	2925	3033	OC(=O)Cc1ccccc1Nc1c(Cl)cccc1Cl	C14H11Cl2NO2	296.15	4.48	4.25901	1.7	1.09745	-1
Didecyldimethylammonium	20256-56-8	JGFDZZLUDWMUQH-UHFFFAOYSA-N	16067	16958	CCCCCCCCCC[N+](C)(C)CCCCCCCCCC	C22H48N	327.64	3.85	4.01045	3.85	4.01045	0
Diethylene glycol monobutyl ether	112-34-5	OAYXUHPQHDHDDZ-UHFFFAOYSA-N	13839549	8177	CCCCOCCOCCO	C8H18O3	162.23	0.55	0.711371	0.55	0.711371	0
Difenoconazole	119446-68-3	BQYJATMQXGBDHF-UHFFFAOYNA-N	77730	86173	CC1COC(CN2C=NC=N2)(O1)C1=C(Cl)C=C(OC2=CC=C(Cl)C=C2)C=C1	C19H17Cl2N3O3	406.27	4	4.85872	4	4.85872	0
Diflubenzuron	35367-38-5	QQQYTWIFVNKMRW-UHFFFAOYSA-N	34065	37123	FC1=CC=CC(F)=C1C(=O)NC(=O)NC1=CC=C(Cl)C=C1	C14H9ClF2N2O2	310.69	3.85	3.60964	3.79	3.60021	-0.02
Diflufenican	83164-33-4	WYEHFWKAOXOVJD-UHFFFAOYSA-N	252609	286529	Fc1ccc(NC(=O)c2cccnc2Oc2cccc(c2)C(F)(F)F)c(F)c1	C19H11F5N2O2	394.3	4.1	5.10546	4.1	5.1049	0
Diglyme	111-96-6	SBZXBUIDTXKZTM-UHFFFAOYSA-N	13839575	8150	COCCOCCOC	C6H14O3	134.18	-0.18	0.0305984	-0.18	0.0305984	0
Dihydrotestosterone	521-18-6	NVKAWKQGWWIWPM-CBOHNHBWSA-N	10189	10635	[H][C@@]12CC[C@H](O)[C@@]1(C)CC[C@@]1([H])[C@@]2([H])CC[C@@]2([H])CC(=O)CC[C@]12C	C19H30O2	290.45	3.69	3.41126	3.69	3.41126	0
Dimethachlor	50563-36-5	SCCDDNKJYDZXMM-UHFFFAOYSA-N	36319	39722	COCCN(C(=O)CCl)c1c(C)cccc1C	C13H18ClNO2	255.75	2.63	2.59223	2.63	2.59223	0
Dimethachlor ESA	171118-09-5	RVSCDWJKJDBFRS-UHFFFAOYSA-N	28290251	86290104	COCCN(C(=O)CS(O)(=O)=O)C1=C(C)C=CC=C1C	C13H19NO5S	301.36	-0.39	1.25241	-3.89	-1.12399	-1
Dimethachlor OA	1086384-49-7	MHGMSAFPNAKIRZ-UHFFFAOYSA-N	28290253	86290105	COCCN(C(=O)C(O)=O)C1=C(C)C=CC=C1C	C13H17NO4	251.28	1.36	2.01448	-2.34	-1.4462	-1
Dimethenamid	87674-68-8	JLYFCTQDENRSOL-UHFFFAOYNA-N	82842	91744	COCC(C)N(C(=O)CCl)c1c(C)csc1C	C12H18ClNO2S	275.8	2.45	2.92169	2.45	2.92169	0
Dimethoate	60-51-5	MCWXGJITAZMZEV-UHFFFAOYSA-N	2973	3082	CNC(=O)CSP(=S)(OC)OC	C5H12NO3PS2	229.25	1.03	0.34166	1.03	0.34166	0
Dimethylaminophenazone	58-15-1	RMMXTBMQSGEXHJ-UHFFFAOYSA-N	5787	6009	CN(C)c1c(C)n(C)n(-c2ccccc2)c1=O	C13H17N3O	231.3	1.1	1.15059	1.1	1.15054	0
Dimethyldioctadecylammonium	3700-67-2	OGQYPPBGSLZBEG-UHFFFAOYSA-N	7592	7880	CCCCCCCCCCCCCCCCCC[N+](C)(C)CCCCCCCCCCCCCCCCCC	C38H80N	552.08	9.63	11.1236	9.63	11.1236	0
Dimoxystrobin	149961-52-4	WXUZAHCNPWONDH-DYTRJAOYSA-N	9111528	10936292	CNC(=O)C(=N\OC)\C1=CC=CC=C1COC1=CC(C)=CC=C1C	C19H22N2O3	326.4	4.2	3.88831	4.2	3.88831	0
Dinoseb	121552-61-2	OWZPCEFYPSAJFR-UHFFFAOYNA-N	6684	6950	CCC(C)c1cc(cc(c1O)[N+]([O-])=O)[N+]([O-])=O	C10H12N2O5	240.22	3.32	3.23923	0.6	1.38003	-1
Dioctylsulfosuccinate	147-89-7	HNSDLXPSAYFUHK-UHFFFAOYNA-N	10862	11339	CCCCC(CC)COC(=O)CC(C(=O)OCC(CC)CCCC)S(O)(=O)=O	C20H38O7S	422.58	4.51	5.23807	1.01	2.86168	-1
Diphenhydramine	58-73-1	ZZVUWRFHKOJYTH-UHFFFAOYSA-N	2989	3100	CN(C)CCOC(c1ccccc1)c1ccccc1	C17H21NO	255.36	3.71	3.65191	1.96	2.17425	0.97
Diphenylether	101-84-8	USIUVYZYUHIAEV-UHFFFAOYSA-N	7302	7583	O(C1=CC=CC=C1)C1=CC=CC=C1	C12H10O	170.21	4.03	3.47353	4.03	3.47353	0
Diphenylphosphate	838-85-7	ASMQGLCHMVWBQR-UHFFFAOYSA-N	12722	13282	OP(=O)(Oc1ccccc1)Oc1ccccc1	C12H11O4P	250.19	1.39	3.05173	-2.11	0.675366	-1
Diphenylphosphine oxide	4559-70-0	ASUOLLHGALPRFK-UHFFFAOYSA-N	222625	254003	O=P(C1=CC=CC=C1)C1=CC=CC=C1	C12H11OP	202.19	2.12	2.827	2.12	2.827	0
Diuron	330-54-1	XMTQQYYKAHVGBJ-UHFFFAOYSA-N	3008	3120	CN(C)C(=O)Nc1ccc(Cl)c(Cl)c1	C9H10Cl2N2O	233.1	2.75	2.53285	2.75	2.53285	0
DMAPMA	5205-93-6	MMTACKRSLZTUOW-QQCJEOGWSA-N	71217	78882	CSCC[C@H](NC(=O)[C@@H](N)CC(O)=O)C(=O)N[C@@H](C)C(=O)N1CCC[C@H]1C(=O)N[C@@H](CCSC)C(=O)N[C@@H](C)C(O)=O	C25H42N6O9S2	634.77	-0.47	-4.90442	-4.07	-7.93666	-1.13
Dodecyl sulfate	151-21-3	MOTZDAYCYVMXPC-UHFFFAOYSA-N	14458	14458	CCCCCCCCCCCCOS(O)(=O)=O	C12H26O4S	266.4	4.12	4.41686	0.62	2.04046	-1
Dodecylbenzenesulfonic acid	27176-87-0	WBIQQQGBSDOWNP-UHFFFAOYSA-N	23761	25457	CCCCCCCCCCCCc1ccccc1S(O)(=O)=O	C18H30O3S	326.5	5.84	6.55783	2.34	4.18143	-1
Dodemorph	1593-77-7	JMXKCYUTURMERF-UHFFFAOYNA-N	55760	61899	CC1CN(CC(C)O1)C1CCCCCCCCCCC1	C18H35NO	281.49	5.65	5.2715	4.09	3.68943	0.97
Domperidone	57808-66-9	FGXWKSZFVQUSTL-UHFFFAOYSA-N	3039	3151	ClC1=CC2=C(C=C1)N(C1CCN(CCCN3C(=O)NC4=CC=CC=C34)CC1)C(=O)N2	C22H24ClN5O2	425.92	4.23	2.9001	2.73	2.74627	0.3
Drospirenone	67392-87-4	METQSPRSQINEEU-OMSYDJSYSA-N	62105	68873	[H][C@@]12[C@@H]3C[C@@H]3[C@@]3(CCC(=O)O3)[C@@]1(C)CC[C@@]1([H])[C@@]2([H])[C@H]2C[C@H]2C2=CC(=O)CC[C@]12C	C24H30O3	366.5	3.46	3.36676	3.47	3.36676	0
Duloxetine	116539-59-4	ZEUITGRIYCTCEM-UHFFFAOYNA-N	54822	60835	CNCCC(Oc1cccc2ccccc12)c1cccs1	C18H19NOS	297.42	4.03	4.19773	1.27	1.94025	1
Dydrogesterone	152-62-5	JGMOKGBVKVMRFX-JNLMXTABSA-N	8699	9051	[H][C@@]12CC[C@H](C(C)=O)[C@@]1(C)CC[C@]1([H])[C@@]2([H])C=CC2=CC(=O)CC[C@@]12C	C21H28O2	312.46	3.3	3.78668	3.3	3.78668	0
Ebastin	90729-43-4	MJJALKDDGIKVBE-UHFFFAOYSA-N	3079	3191	CC(C)(C)C1=CC=C(C=C1)C(=O)CCCN1CCC(CC1)OC(C1=CC=CC=C1)C1=CC=CC=C1	C32H39NO2	469.67	7.18	6.96302	5.97	5.89161	0.92
EDDP	30223-73-5	AJRJPORIQGYFMT-PVOVUMCXNA-N	4526936	5378015	C\C=C1/N(C)C(C)CC1(c1ccccc1)c1ccccc1	C20H23N	277.41	4.91	4.62996	4.15	2.41013	0.99
Efavirenz	154598-52-4	XPOQHMRABVBWPR-UHFFFAOYNA-N	3091	3203	FC(F)(F)C1(OC(=O)NC2=C1C=C(Cl)C=C2)C#CC1CC1	C14H9ClF3NO2	315.68	4.38	4.45653	4.38	4.45652	0
Enalapril	75847-73-3	GBXSMTUPTTWBMN-XIRDDKMYSA-N	4534998	5388962	CCOC(=O)[C@H](CCC1=CC=CC=C1)N[C@@H](C)C(=O)N1CCC[C@H]1C(O)=O	C20H28N2O5	376.46	2	0.587777	-1.4	-1.05527	-0.99
Enrofloxacin	93106-60-6	SPFYMRJSYKOXGV-UHFFFAOYSA-N	64326	71188, 6957639	CCN1CCN(CC1)c1cc2n(cc(C(O)=O)c(=O)c2cc1F)C1CC1	C19H22FN3O3	359.4	0.37	1.15078	-0.77	0.587673	-0.79
Epiandrosterone	481-29-8	QGXBDMJGAMFCBF-LUJOEAJASA-N	390065	441302	C[C@]12CC[C@H]3[C@@H](CC[C@H]4C[C@@H](O)CC[C@]34C)[C@@H]1CCC2=O	C19H30O2	290.45	3.69	3.76728	3.69	3.76728	0
Epoxiconazole	106325-08-0	ZMYFCFLJBGAQRS-UHFFFAOYNA-N	24751862	3317081	Fc1ccc(cc1)C1(Cn2cncn2)OC1c1ccccc1Cl	C17H13ClFN3O	329.76	3.72	3.73508	3.72	3.73508	0
Erythromycin	114-07-8	ULGZDMOVFRHVEP-RWJQBGPGSA-N	12041	12560	CC[C@H]1OC(=O)[C@H](C)[C@@H](O[C@H]2C[C@@](C)(OC)[C@@H](O)[C@H](C)O2)[C@H](C)[C@@H](O[C@@H]2O[C@H](C)C[C@@H]([C@H]2O)N(C)C)[C@](C)(O)C[C@@H](C)C(=O)[C@H](C)[C@@H](O)[C@]1(C)O	C37H67NO13	733.95	2.44	2.59639	1.35	1.57326	0.91
Estriol	50-27-1	PROQIPRRNZUXQM-ZXXIGWHRSA-N	5553	5756	C[C@]12CC[C@H]3[C@@H](CCc4cc(O)ccc34)[C@@H]1C[C@@H](O)[C@@H]2O	C18H24O3	288.39	2.71	2.6706	2.71	2.67009	0
Estrone	53-16-7	DNXHEGUUPJUMQT-CBZIJGRNSA-N	5660	5870	C[C@]12CC[C@H]3[C@@H](CCc4cc(O)ccc34)[C@@H]1CCC2=O	C18H22O2	270.37	3.38	4.30903	3.38	4.30852	0
Ethion	563-12-2	RIZMRRKBZQXFOY-UHFFFAOYSA-N	3171	3286	CCOP(=S)(OCC)SCSP(=S)(OCC)OCC	C9H22O4P2S4	384.46	4.94	3.92923	4.94	3.92923	0
Ethofumesate	26225-79-6	IRCMYGHHKLLGHV-UHFFFAOYNA-N	30816	33360	CCOC1Oc2ccc(OS(C)(=O)=O)cc2C1(C)C	C13H18O5S	286.35	2.14	2.33645	2.14	2.33645	0
Ethyl azinphos	2642-71-9	RQVGAIADHNPSME-UHFFFAOYSA-N	16576	17531	CCOP(=S)(OCC)SCn1nnc2ccccc2c1=O	C12H16N3O3PS2	345.37	3.58	3.95839	3.58	3.95839	0
Ethyl-4-dimethylaminobenzoate	10287-53-3	FZUGPQWGEGAKET-UHFFFAOYSA-N	23472	25127	CCOC(=O)c1ccc(cc1)N(C)C	C11H15NO2	193.25	2.93	2.44157	2.93	2.44156	0
Ethylene glycol diphenylether	104-66-5	XCSGHNKDXGYELG-UHFFFAOYSA-N	15090631, 15367060, 7427	7713	C(COc1ccccc1)Oc1ccccc1	C14H14O2	214.27	3.82	3.45962	3.82	3.45962	0
Ethylenethiourea	96-45-7	PDQAZBWRQCGBEV-UHFFFAOYSA-N	2005851	2723650	S=C1NCCN1	C3H6N2S	102.15	-0.52	-0.198137	-0.52	-0.198137	0
Ethylparaben	120-47-8	NUVBSKCKDOMJSU-UHFFFAOYSA-N	13846749	8434	CCOC(=O)c1ccc(O)cc1	C9H10O3	166.18	2.53	2.02997	2.51	1.99702	-0.07
Etofenprox	80844-07-1	YREQHYQNNWYQCJ-UHFFFAOYSA-N	64377	71245	CCOC1=CC=C(C=C1)C(C)(C)COCC1=CC=CC(OC2=CC=CC=C2)=C1	C25H28O3	376.5	6.6	6.30455	6.6	6.30455	0
Exemestane	107868-30-4	BFYIZQONLCFLEV-OYMCZBBHSA-N	54278	60198	[H][C@@]12CCC(=O)[C@@]1(C)CC[C@@]1([H])[C@@]2([H])CC(=C)C2=CC(=O)C=C[C@]12C	C20H24O2	296.41	3.01	3.86615	3.01	3.86615	0
Fenofibrate	49562-28-9	YMTINGFKWWXKFG-UHFFFAOYSA-N	3222	3339	CC(C)OC(=O)C(C)(C)OC1=CC=C(C=C1)C(=O)C1=CC=C(Cl)C=C1	C20H21ClO4	360.84	5.01	5.27776	5.01	5.27776	0
Fenoxycarb	79127-80-3	HJUFTIJOISQSKQ-UHFFFAOYSA-N	46739	51605	CCOC(=O)NCCOC1=CC=C(OC2=CC=CC=C2)C=C1	C17H19NO4	301.35	3.91	3.31382	3.91	3.31382	0
Fenpropidin	67306-00-7	MGNFYQILYYYUBS-UHFFFAOYNA-N	82797	91694	CC(CN1CCCCC1)CC1=CC=C(C=C1)C(C)(C)C	C19H31N	273.47	5.72	5.40827	3.13	2.78631	1
Fenpropimorph	67564-91-4	RYAUSSKQMZRMAI-ALOPSCKCSA-N	84290	93365	CC(CN1C[C@H](C)O[C@H](C)C1)Cc1ccc(cc1)C(C)(C)C	C20H33NO	303.49	5.03	5.17255	4.53	4.04829	0.93
Fenthion	55-38-9	PNVJTZOFSHSLTO-UHFFFAOYSA-N	3229	3346	COP(=S)(OC)OC1=CC=C(SC)C(C)=C1	C10H15O3PS2	278.32	3.8	3.80324	3.8	3.80324	0
Fenuron	101-42-8	XXOYNJXVWVNOOJ-UHFFFAOYSA-N	7279	7560	CN(C)C(=O)Nc1ccccc1	C9H12N2O	164.21	1.24	1.32476	1.24	1.32476	0
Finasteride	98319-26-7	DBEPLOCGEIEOCV-WSBQPABSSA-N	51714	57363, 11610425	CC(C)(C)NC(=O)[C@H]1CC[C@H]2[C@@H]3CC[C@H]4NC(=O)C=C[C@]4(C)[C@H]3CC[C@]12C	C23H36N2O2	372.56	3.01	3.07351	3.01	3.07351	0
Fipronil	120068-37-3	ZOCSXAVNDGMNBV-UHFFFAOYNA-N	3235	3352	Nc1c(c(nn1-c1c(Cl)cc(cc1Cl)C(F)(F)F)C#N)S(=O)C(F)(F)F	C12H4Cl2F6N4OS	437.15	3.71	4.48914	3.71	4.48914	0
Fipronil desulfinyl	205650-65-3	JWKXVHLIRTVXLD-UHFFFAOYSA-N	11542895	22673275	NC1=C(C(=NN1C1=C(Cl)C=C(C=C1Cl)C(F)(F)F)C#N)C(F)(F)F	C12H4Cl2F6N4	389.09	4.56	4.52516	4.56	4.52516	0
Fipronil sulfide	120067-83-6	FQXWEKADCSXYOC-UHFFFAOYSA-N	8129550	9953940	NC1=C(SC(F)(F)F)C(=NN1C1=C(Cl)C=C(C=C1Cl)C(F)(F)F)C#N	C12H4Cl2F6N4S	421.15	4.8	5.61604	4.8	5.61604	0
Fipronil sulfone	120068-36-2	LGHZJDKSVUTELU-UHFFFAOYSA-N	2336427	3078139	NC1=C(C(=NN1C1=C(Cl)C=C(C=C1Cl)C(F)(F)F)C#N)S(=O)(=O)C(F)(F)F	C12H4Cl2F6N4O2S	453.15	4.86	4.59603	4.86	4.59603	0
Fluconazole	86386-73-4	RFHAOTPXVQNOHP-UHFFFAOYSA-N	3248	3365	OC(Cn1cncn1)(Cn1cncn1)c1ccc(F)cc1F	C13H12F2N6O	306.28	0.7	0.560958	0.7	0.56095	0
Flufenacet	142459-58-3	IANUJLZYFUDJIH-UHFFFAOYSA-N	77944	86429	CC(C)N(C(=O)COc1nnc(s1)C(F)(F)F)c1ccc(F)cc1	C14H13F4N3O2S	363.33	3.01	3.2227	3.01	3.2227	0
Flufenoxuron	101463-69-8	RYLHNOVXKPXDIP-UHFFFAOYSA-N	82863	91766	FC1=CC(OC2=CC=C(C=C2Cl)C(F)(F)F)=CC=C1NC(=O)NC(=O)C1=C(F)C=CC=C1F	C21H11ClF6N2O3	488.78	5.88	6.13048	5.8	6.1196	-0.03
Flumequine	42835-25-6	DPSPPJIUMHPXMA-UHFFFAOYNA-N	3257	3374	CC1CCC2=C3N1C=C(C(O)=O)C(=O)C3=CC(F)=C2	C14H12FNO3	261.25	1.61	2.41684	-0.27	1.00765	-0.96
Flumioxazin	103361-09-7	FOUWCSDKDDHKQP-UHFFFAOYSA-N	83443	92425	FC1=CC2=C(C=C1N1C(=O)C3=C(CCCC3)C1=O)N(CC#C)C(=O)CO2	C19H15FN2O4	354.34	2	1.47846	2	1.47846	0
Flunisolide	3385-03-03	XSFJVAJPIHIPKU-JMQDUUJUSA-N	74144	82153	[H][C@@]12C[C@H]3OC(C)(C)O[C@@]3(C(=O)CO)[C@@]1(C)C[C@H](O)[C@@]1([H])[C@@]2([H])C[C@H](F)C2=CC(=O)C=C[C@]12C	C24H31FO6	434.51	2.54	1.56079	2.54	1.56079	0
Fluorescent brightener 351	27344-41-8	SQAKQVFOMMLRPR-IWGRKNQJSA-N	4489283	1712029	OS(=O)(=O)c1ccccc1\C=C\c1ccc(cc1)-c1ccc(\C=C\c2ccccc2S(O)(=O)=O)cc1	C28H22O6S2	518.6	3.07	6.66197	-1.43	1.90917	-2
Fluorescent brightener 71	24231-46-7	YGUMVDWOQQJBGA-VAWYXSNFSA-N	4938753	5750263	OS(=O)(=O)C1=CC(NC2=NC(NC3=CC=CC=C3)=NC(=N2)N2CCOCC2)=CC=C1\C=C\C1=C(C=C(NC2=NC(=NC(NC3=CC=CC=C3)=N2)N2CCOCC2)C=C1)S(O)(=O)=O	C40H40N12O8S2	880.96	-0.15	1.77996	-4.64	3.29689	-1.99
Fluorometholone	426-13-1	FAOZLTXFLGPHNG-JNEPIMCLSA-N	9494	9878	[H][C@@]12CC[C@](O)(C(C)=O)[C@@]1(C)C[C@H](O)[C@@]1(F)[C@@]2([H])C[C@H](C)C2=CC(=O)C=C[C@]12C	C22H29FO4	376.47	2.45	2.42086	2.45	2.42086	0
Fluoxastrobin	361377-29-9	UFEODZBUAFNAEU-NLRVBDNBSA-N	9223963	11048796	CO\N=C(\C1=NOCCO1)C1=C(OC2=C(F)C(OC3=C(Cl)C=CC=C3)=NC=N2)C=CC=C1	C21H16ClFN4O5	458.84	4.28	5.2194	4.28	5.2194	0
Flurtamone	96525-23-4	NYRMIJKDBAQCHC-UHFFFAOYNA-N	82853	91755	CNC1=C(C(=O)C(O1)c1ccccc1)c1cccc(c1)C(F)(F)F	C18H14F3NO2	333.31	3.9	4.64216	3.9	4.64216	0
Flusilazole	85509-19-9	FQKUGOMFVDPBIZ-UHFFFAOYSA-N	14277782	73675	C[Si](Cn1cncn1)(c1ccc(F)cc1)c1ccc(F)cc1	C16H15F2N3Si	315.4	4.09	4.6832	4.09	4.6832	0
Flutamide	13311-84-7	MKXKFYHWDHIYRV-UHFFFAOYSA-N	3280	3280	CC(C)C(=O)Nc1ccc(c(c1)C(F)(F)F)N(=O)=O	C11H11F3N2O3	276.22	3.14	3.27231	3.14	3.27231	0
Fluticasone propionate	80474-14-2	WMWTYOKRWGGJOA-CENSZEJFSA-N	392059	444036	CCC(=O)O[C@@]1([C@H](C)C[C@H]2[C@@H]3C[C@H](F)C4=CC(=O)C=C[C@]4(C)[C@@]3(F)[C@@H](O)C[C@]12C)C(=O)SCF	C25H31F3O5S	500.58	3.71	3.718	3.71	3.718	0
Fluvoxamine	54739-18-3	CJOFXWAVKWHTFT-UHFFFAOYSA-N	3287	3404	COCCCCC(=NOCCN)C1=CC=C(C=C1)C(F)(F)F	C15H21F3N2O2	318.34	3.04	2.79532	0.73	1.04757	0.97
Furosemide	54-31-9	ZZUFCTLCJUWOSV-UHFFFAOYSA-N	3322	3440	NS(=O)(=O)c1cc(C(O)=O)c(NCc2ccco2)cc1Cl	C12H11ClN2O5S	330.74	2.35	1.7484	-0.74	-1.25064	-1
Gabapentin	60142-96-3	UGJMXCAKCUNAIE-UHFFFAOYSA-N	3328	3446, 6919078	NCC1(CC(O)=O)CCCCC1	C9H17NO2	171.24	1.1	-1.27303	-1.4	-1.27286	0
Gabapentin-Lactam	64744-50-9	JAWPQJDOQPSNIQ-UHFFFAOYSA-N	57334360	71312478	O=C1CC2(CN1)CCCCC2	C9H15NO	153.23	1.49	1.03334	1.49	1.03334	0
Galaxolide	1222-05-5	ONKNPOPIGWHAQC-UHFFFAOYNA-N	82618	91497	CC1C(C)(C)c2cc3COCC(C)c3cc2C1(C)C	C18H26O	258.41	5.93	4.72272	5.93	4.72272	0
Gemfibrozil	25812-30-0	HEMJJKBWTPKOJG-UHFFFAOYSA-N	3345	3463	Cc1ccc(C)c(OCCCC(C)(C)C(O)=O)c1	C15H22O3	250.34	4.19	4.38964	1.96	1.51465	-1
Genistein	446-72-0	TZBJGXHYKVUXJN-UHFFFAOYSA-N	4444448	5280961	Oc1ccc(cc1)-c1coc2cc(O)cc(O)c2c1=O	C15H10O5	270.24	2.63	3.07687	1.86	2.11501	-1.06
Gestoden	60282-87-3	SIGSPDASOTUPFS-XUDSTZEESA-N	2298532	3033968	[H][C@@]12C=C[C@@](O)(C#C)[C@@]1(CC)CC[C@]1([H])[C@@]3([H])CCC(=O)C=C3CC[C@@]21[H]	C21H26O2	310.44	3.12	3.45578	3.12	3.45578	0
Glibenclamide	10238-21-8	ZNNLBTZKUZBEKO-UHFFFAOYSA-N	3368	3488	COc1ccc(Cl)cc1C(=O)NCCc1ccc(cc1)S(=O)(=O)NC(=O)NC1CCCCC1	C23H28ClN3O5S	494.01	3.79	3.79111	1.93	2.85096	-1
Glimepiride	93479-97-1	WIGIZIANZCJQQY-UHFFFAOYSA-N	13420795, 16740595	18432401	CCC1=C(C)CN(C(=O)NCCc2ccc(cc2)S(=O)(=O)NC(=O)NC2CCC(C)CC2)C1=O	C24H34N4O5S	490.62	3.17	3.12053	1.31	2.18039	-1
Guanylurea	10310-28-8	SQSPRWMERUQXNE-UHFFFAOYSA-N	8527	8859	NC(N)=NC(N)=O	C2H6N4O	102.1	-1.75	-2.03388	-1.91	-2.04479	0.02
Habanolide	111879-80-2	KHLFMZDGADSQGR-UHFFFAOYSA-N	8031849	53411144	O=C1OCCCCCCCCCCCCC=C1	C15H26O2	238.37	5.11	5.27096	5.11	5.27096	0
Harman	486-84-0	PSFDQSOCUJVVGF-UHFFFAOYSA-N	4444755	5281404	CC1=NC=CC2=C1NC1=C2C=CC=C1	C12H10N2	182.23	3.11	2.00458	1.53	1.98923	0.04
Harmine	442-51-3	BXNJHAXVSOCGBA-UHFFFAOYSA-N	4444445	5280953	COC1=CC2=C(C=C1)C1=C(N2)C(C)=NC=C1	C13H12N2O	212.25	2.91	1.84691	1.26	1.82382	0.05
Hexa(methoxymethyl)melamine	3089-11-0	BNCADMBVWNPPIZ-UHFFFAOYSA-N	56259	62479	COCN(COC)c1nc(nc(n1)N(COC)COC)N(COC)COC	C15H30N6O6	390.44	1.54	2.59497	1.54	2.57772	0.04
Hexadecylpyridinium	7773-52-6	NEUSVAOJNUQRTM-UHFFFAOYSA-N	2582	2582	CCCCCCCCCCCCCCCC[n+]1ccccc1	C21H38N	305.55	2.29	3.47093	2.29	3.47093	1
Hexadecyltrimethylammonium	57-09-0	RLGQACBPNDBWTB-UHFFFAOYSA-N	2580	2681	CCCCCCCCCCCCCCCC[N+](C)(C)C	C19H42N	285.56	2.66	2.68656	2.66	2.68656	0
Hexazinone	51235-04-2	CAWXEEYDBZRFPE-UHFFFAOYSA-N	36542	39965	CN(C)c1nc(=O)n(C2CCCCC2)c(=O)n1C	C12H20N4O2	252.32	1.91	1.36912	1.91	1.36912	0
Homosalate	118-56-9	WSSJONWNBBTCMG-UHFFFAOYNA-N	8059	8362	CC1CC(CC(C)(C)C1)OC(=O)c1ccccc1O	C16H22O3	262.35	5.31	4.99651	5.28	4.99444	0
Hydrochlorothiazide	58-93-5	JZUFKLXOESDKRF-UHFFFAOYSA-N	3513	3639	NS(=O)(=O)c1cc2c(NCNS2(=O)=O)cc1Cl	C7H8ClN3O4S2	297.73	0.01	-0.575618	0	-0.58348	-0.02
Hydrocortisonacetate	50-03-3	ALEXXDVDDISNDU-FDLDLGJISA-N	5542	5744	[H][C@@]12CC[C@](O)(C(=O)COC(C)=O)[C@@]1(C)C[C@H](O)[C@@]1([H])[C@@]2([H])CCC2=CC(=O)CC[C@]12C	C23H32O6	404.51	2.41	1.71629	2.41	1.71629	0
Hydrocortisone	50-23-7	JYGXADMDTFJGBT-YTOKYWIMSA-N	5551	5754	[H][C@@]12CC[C@](O)(C(=O)CO)[C@@]1(C)C[C@H](O)[C@@]1([H])[C@@]2([H])CCC2=CC(=O)CC[C@]12C	C21H30O5	362.47	1.66	1.27517	1.66	1.27516	0
Hydroxycarbamide	127-07-1	VSNHCAURESNICA-UHFFFAOYSA-N	13426871, 13486321, 14245952, 3530	3657	NC(=O)NO	CH4N2O2	76.06	-1.54	-1.36702	-1.54	-1.36779	0
Hydroxychloroquine	118-42-3	XXSMGPRMXLTPCZ-UHFFFAOYNA-N	3526	3652	CCN(CCO)CCCC(C)NC1=C2C=CC(Cl)=CC2=NC=C1	C18H26ClN3O	335.88	3.5	2.88697	1.53	0.326785	1.43
Ibuprofen	15687-27-1	HEFNNWSXXWATRW-UHFFFAOYNA-N	3544	3672	CC(C)Cc1ccc(cc1)C(C)C(O)=O	C13H18O2	206.29	3.37	3.84356	0.81	1.33739	-1
Icaridin	119515-38-7	QLHULAHOXSSASE-UHFFFAOYNA-N	111359	125098	CCC(C)OC(=O)N1CCCCC1CCO	C12H23NO3	229.32	1.87	1.61225	1.87	1.61225	0
Ifosfamide	3778-73-2	HOMGKSMUEGBAAB-UHFFFAOYNA-N	3562	3690	ClCCNP1(=O)OCCCN1CCCl	C7H15Cl2N2O2P	261.09	0.68	0.0965477	0.68	0.0965476	0
Imatinib	152459-95-5	KTUFNOKKBVMGRW-UHFFFAOYSA-N	5101	5291	CN1CCN(CC2=CC=C(C=C2)C(=O)NC2=CC(NC3=NC=CC(=N3)C3=CN=CC=C3)=C(C)C=C2)CC1	C29H31N7O	493.62	3.1	4.37767	2.42	3.52628	0.74
Imazalil	35554-44-0	PZBPKYOVPCNPJY-UHFFFAOYNA-N	34116	37175	Clc1ccc(C(Cn2ccnc2)OCC=C)c(Cl)c1	C14H14Cl2N2O	297.19	4.03	3.75506	3.84	3.68935	0.19
Imidacloprid	138261-41-3	YWTYJOPNNQFBPC-UHFFFAOYSA-N	77934	86418	[O-][N+](=O)\N=C1/NCCN1Cc1ccc(Cl)nc1	C9H10ClN5O2	255.67	0.38	0.760185	0.38	0.533748	0
Imidacloprid-guanidine	127202-53-3	UEQZFAGVRGWPDK-UHFFFAOYSA-N	8306043	10130527	NC1=NCCN1CC1=CN=C(Cl)C=C1	C9H11ClN4	210.67	0.17	0.68592	-0.4	-1.69911	1
Imidacloprid-urea	120868-66-8	ADWTYURAFSWNSU-UHFFFAOYSA-N	10248201	15390532	ClC1=NC=C(CN2CCNC2=O)C=C1	C9H10ClN3O	211.65	0.9	0.466692	0.9	0.466691	0
Iminostilbene	256-96-2	LCGTWRLJTMHIQZ-UHFFFAOYSA-N	8857	9212	N1c2ccccc2C=Cc2ccccc12	C14H11N	193.25	3.54	3.77977	3.54	3.77977	0
Indole-3-carboxyaldehyde	487-89-8	OLNJUISKUQQNIM-UHFFFAOYSA-N	9838	10256	O=CC1=CNC2=CC=CC=C12	C9H7NO	145.16	1.89	1.78451	1.89	1.78451	0
Indometacin	53-86-1	CGIGDMFJXJATDK-UHFFFAOYSA-N	3584	3715	COC1=CC2=C(C=C1)N(C(=O)C1=CC=C(Cl)C=C1)C(C)=C2CC(O)=O	C19H16ClNO4	357.8	4.02	3.52967	1.06	0.268554	-1
Indoxacarb	174060-41-4	VBCVPMMZEGZULK-NRFANRHFSA-N	96889	107720	COC(=O)N(C(=O)N1CO[C@]2(CC3=CC(Cl)=CC=C3C2=N1)C(=O)OC)C1=CC=C(OC(F)(F)F)C=C1	C22H17ClF3N3O7	527.84	3.7	5.38944	3.7	5.38944	0
Iohexol	66108-95-0	NTHXOOBQLCIOLC-UHFFFAOYNA-N	3599	3730	CC(=O)N(CC(O)CO)c1c(I)c(C(=O)NCC(O)CO)c(I)c(C(=O)NCC(O)CO)c1I	C19H26I3N3O9	821.15	-3.17	-1.95082	-3.17	-1.95084	0
Iopamidol	60166-93-0	XQZXYNRDCRIARQ-LURJTMIESA-N	3603	65492	C[C@H](O)C(=O)Nc1c(I)c(C(=O)NC(CO)CO)c(I)c(C(=O)NC(CO)CO)c1I	C17H22I3N3O8	777.09	-2.31	-0.742935	-2.31	-0.743037	0
Iprodione	36734-19-7	ONUFESLQCSAYKA-UHFFFAOYSA-N	34418	37517	CC(C)NC(=O)N1CC(=O)N(C1=O)C1=CC(Cl)=CC(Cl)=C1	C13H13Cl2N3O3	330.17	3.31	2.29163	3.31	2.29141	0
Irgarol	28159-98-0	HDHLIWCXDDZUFH-UHFFFAOYSA-N	82701	91590	CSc1nc(NC2CC2)nc(NC(C)(C)C)n1	C11H19N5S	253.37	3.21	2.98539	3.21	2.97723	0.02
ISO E Super	54464-57-2	FVUGZKDGWGKCFE-UHFFFAOYNA-N	97308	108242	CC1CC2=C(CC1(C)C(C)=O)C(C)(C)CCC2	C16H26O	234.38	4.72	4.20009	4.72	4.20009	0
Isophorone diamine	2855-13-2	RNLHGQLZWXBQNY-UHFFFAOYSA-N	16867	17857	CC1(C)CC(N)CC(C)(CN)C1	C10H22N2	170.3	1.44	0.960291	-2.65	-4.15864	1.99
Isoproturon	34123-59-6	PUIYMUZLKQOUOZ-UHFFFAOYSA-N	33695	36679	CC(C)c1ccc(NC(=O)N(C)C)cc1	C12H18N2O	206.29	2.45	2.56977	2.45	2.56977	0
Isoxaben	82558-50-7	PMHURSZHKKJGBM-UHFFFAOYSA-N	66323	73672	CCC(C)(CC)C1=NOC(NC(=O)C2=C(OC)C=CC=C2OC)=C1	C18H24N2O4	332.4	3.6	4.02367	3.6	4.02314	0
Ketamine	6740-88-1	YQEZLKZALYSWHR-UHFFFAOYNA-N	3689	3821	CNC1(CCCCC1=O)c1ccccc1Cl	C13H16ClNO	237.73	2.12	3.3473	2.01	3.14851	0.37
Ketoconazole	65277-42-1	XMAYWYJOQHXEEK-OZXSUGGESA-N	3691	3823	CC(=O)N1CCN(CC1)c1ccc(OC[C@H]2CO[C@@](Cn3ccnc3)(O2)c2ccc(Cl)cc2Cl)cc1	C26H28Cl2N4O4	531.44	3.61	4.1916	3.36	4.12852	0.18
Ketoprofen	22071-15-4	DKYWVDODHFEZIM-UHFFFAOYNA-N	3693	3825	CC(C(O)=O)c1cccc(c1)C(=O)c1ccccc1	C16H14O3	254.29	3.12	3.61333	0.39	0.390844	-1
L-thyroxine	51-48-9	XUIIKFGFIJCVMT-LBPRGKRZSA-N	5614	5819	[NH3+][C@@H](CC1=CC(I)=C(OC2=CC(I)=C(O)C(I)=C2)C(I)=C1)C([O-])=O	C15H11I4NO4	777.88	4.8	3.72731	1.98	3.44092	-0.49
Labetalol	36894-69-6	SGUAFYQXFOLMHL-UHFFFAOYNA-N	3734	3869	CC(CCC1=CC=CC=C1)NCC(O)C1=CC(C(N)=O)=C(O)C=C1	C19H24N2O3	328.41	2.74	1.88651	0.53	1.25841	0.81
Lamotrigine	139481-59-7	PYZRQGJRPPTADH-UHFFFAOYSA-N	3741	3878	NC1=NC(N)=C(N=N1)C1=C(Cl)C(Cl)=CC=C1	C9H7Cl2N5	256.1	1.68	1.92652	1.67	1.91378	0.03
Lauramidopropylbetaine	4292-10-08	MRUAUOIMASANKQ-UHFFFAOYSA-N	19955642	20280	CCCCCCCCCCCC(=O)NCCC[N+](C)(C)CC([O-])=O	C19H39N2O3	344.54	0.33	-0.710707	0.93	0.0598224	-1
Lauric isopropanolamide	142-54-1	MMBILEWCGWTAOV-UHFFFAOYNA-N	8078903	9903249	CCCCCCCCCCCC(=O)NCC(C)O	C15H31NO2	257.42	4.2	3.62151	4.2	3.62151	0
Lauryl diethanolamide	120-40-1	AOMUHOFOVNGZAN-UHFFFAOYSA-N	8123	8430	CCCCCCCCCCCC(=O)N(CCO)CCO	C16H33NO3	287.45	3.95	2.73851	3.95	2.73851	0
Lenacil	2164-08-01	ZTMKADLOSYKWCA-UHFFFAOYSA-N	15699	16559	O=c1[nH]c2CCCc2c(=O)n1C1CCCCC1	C13H18N2O2	234.3	2.56	1.82408	2.56	1.82404	0
Lidocaine	137-58-6	NNJVILVZKWQKPM-UHFFFAOYSA-N	3548	3676	CCN(CC)CC(=O)Nc1c(C)cccc1C	C14H22N2O	234.34	2.33	2.84291	1.5	2.32971	0.69
Lincomycin	154-21-2	OJMMVQQUTAEWLP-KIDUDLJLSA-N	2272112	3000540	CCC[C@@H]1C[C@H](N(C)C1)C(=O)N[C@H]([C@@H](C)O)[C@H]1O[C@H](SC)[C@H](O)[C@@H](O)[C@H]1O	C18H34N2O6S	406.54	0.63	-0.316854	-0.82	-0.99001	0.79
Linuron	330-55-2	XKJMBINCVNINCA-UHFFFAOYSA-N	9130	9502	CON(C)C(=O)Nc1ccc(Cl)c(Cl)c1	C9H10Cl2N2O2	249.1	3.08	2.68395	3.08	2.68394	0
Loperamide	53179-11-6	RDOIQAHITMMDAJ-UHFFFAOYSA-N	3818	3955	CN(C)C(=O)C(CCN1CCC(O)(CC1)c1ccc(Cl)cc1)(c1ccccc1)c1ccccc1	C29H33ClN2O2	477.05	4.47	4.77119	3.62	2.7714	0.99
Lorazepam	846-49-1	DIWRORZWFLOCLC-UHFFFAOYNA-N	3821	3958	OC1N=C(c2ccccc2Cl)c2cc(Cl)ccc2NC1=O	C15H10Cl2N2O2	321.16	2.49	3.52733	2.49	3.52706	0
Losartan	114798-26-4	PSIFNNKUMBGKDQ-UHFFFAOYSA-N	3824	3961	CCCCC1=NC(Cl)=C(CO)N1CC1=CC=C(C=C1)C1=CC=CC=C1C1=NNN=N1	C22H23ClN6O	422.92	3.58	5.08491	1.65	5.03468	-0.11
m-Xylene-4-sulfonic acid	88-61-9	CHZLVSBMXZSPNN-UHFFFAOYSA-N	6672	6938	CC1=CC(C)=C(C=C1)S(O)(=O)=O	C8H10O3S	186.23	0.47	2.181	-3.03	-0.195403	-1
MCPA	94-74-6	WHKUVVPPKQRRBV-UHFFFAOYSA-N	6935	7204	Cc1cc(Cl)ccc1OCC(O)=O	C9H9ClO3	200.62	2.55	2.41102	-0.95	-1.00081	-1
Mebendazole	31431-39-7	OPXLLQIJSORQAM-UHFFFAOYSA-N	3890	4030	COC(=O)NC1=NC2=C(N1)C=C(C=C2)C(=O)C1=CC=CC=C1	C16H13N3O3	295.3	2.76	3.26011	2.75	3.22668	-0.08
Mebeverine	2753-45-9	VYVKHNNGDFVQGA-UHFFFAOYNA-N	3891	4031	CCN(CCCCOC(=O)C1=CC(OC)=C(OC)C=C1)C(C)CC1=CC=C(OC)C=C1	C25H35NO5	429.56	5.2	4.88619	2.79	2.07759	1
Mecoprop	93-65-2	WNTGYJSOUMFZEP-UHFFFAOYNA-N	6886	7153	CC(Oc1ccc(Cl)cc1C)C(O)=O	C10H11ClO3	214.65	2.97	2.97979	-0.51	-0.405694	-1
Medroxyprogesterone	520-85-4	FRQMUZJSZHZSGN-XGDBIAKQSA-N	10185	10631	[H][C@@]12CC[C@](O)(C(C)=O)[C@@]1(C)CC[C@@]1([H])[C@@]2([H])C[C@H](C)C2=CC(=O)CC[C@]12C	C22H32O3	344.5	3.52	3.6882	3.52	3.6882	0
Medroxyprogesteroneacetate	71-58-9	PSGAAPLEWMOORI-YXNVQZEVSA-N	6043	6279	C[C@H]1C[C@H]2[C@@H]3CC[C@](OC(C)=O)(C(C)=O)[C@@]3(C)CC[C@@H]2[C@@]2(C)CCC(=O)C=C12	C24H34O4	386.54	4.04	4.12932	4.04	4.12932	0
Mefenamic acid	61-68-7	HYYBABOKPJLUIN-UHFFFAOYSA-N	3904	4044	Cc1cccc(Nc2ccccc2C(O)=O)c1C	C15H15NO2	241.29	5	5.3976	2.23	2.17664	-1
Megestrol-17-acetate	595-33-5	RQZAXGRLVPAYTJ-BVZJDPNESA-N	11192	11683	CC(=O)O[C@@]1(CC[C@H]2[C@@H]3C=C(C)C4=CC(=O)CC[C@]4(C)[C@H]3CC[C@]12C)C(C)=O	C24H32O4	384.52	3.83	3.72374	3.83	3.72374	0
Melamine	108-78-1	JDSHMPZPIAZGSV-UHFFFAOYSA-N	7667	7955	Nc1nc(N)nc(N)n1	C3H6N6	126.12	-1.18	-0.594688	-1.19	-1.71993	0.94
Melperon	3575-80-2	DKMFBWQBDIGMHM-UHFFFAOYSA-N	14646	15387	CC1CCN(CCCC(=O)C2=CC=C(F)C=C2)CC1	C16H22FNO	263.36	3.58	3.22815	1.31	1.7207	0.97
Memantine	19982-08-2	BUGYDGFZZOZRHP-UHFFFAOYNA-N	3914	4054	CC12CC3CC(C)(C1)CC(N)(C3)C2	C12H21N	179.31	3.48	2.06604	0.46	-0.778138	1
Mepiquat	24307-26-4	NNCAWEWCFVZOGF-UHFFFAOYSA-N	17698	18743	C[N+]1(C)CCCCC1	C7H16N	115.22	-2.34	-3.1218	-2.34	-3.1218	0
Mesalazine	89-57-6	KBOPZPXVLCULAV-UHFFFAOYSA-N	3933	4075	NC1=CC(C(O)=O)=C(O)C=C1	C7H7NO3	153.14	1.14	-0.289782	-1.95	-1.71833	-0.97
Mestranol	72-33-3	IMSSROKUHAOUJS-MJCUULBUSA-N	6054	6291	COc1ccc2[C@H]3CC[C@@]4(C)[C@@H](CC[C@@]4(O)C#C)[C@@H]3CCc2c1	C21H26O2	310.44	4.28	4.04325	4.28	4.04325	0
Metalaxyl	57837-19-1	ZQEIXNIJLIKNTD-UHFFFAOYNA-N	38839	42586	COCC(=O)N(C(C)C(=O)OC)c1c(C)cccc1C	C15H21NO4	279.34	1.88	2.12039	1.88	2.12039	0
Metamitron	41394-05-2	VHCNQEUWZYOAEV-UHFFFAOYSA-N	35563	38854	Cc1nnc(-c2ccccc2)c(=O)n1N	C10H10N4O	202.22	0.87	0.444439	0.87	0.444429	0
Metazachlor	67129-08-2	STEPQTYSZVCJPV-UHFFFAOYSA-N	44885	49384	Cc1cccc(C)c1N(Cn1cccn1)C(=O)CCl	C14H16ClN3O	277.76	2.28	2.97889	2.28	2.97889	0
Metazachlor ESA	172960-62-2	IPVCSECPEVHQOV-UHFFFAOYSA-N	28290254	86290102	CC1=CC=CC(C)=C1N(CN1C=CC=N1)C(=O)CS(O)(=O)=O	C14H17N3O4S	323.37	-0.48	0.372429	-3.98	-0.737281	-1
Metconazole	125116-23-6	XWPZUHJBOLQNMN-UHFFFAOYNA-N	77764	86210	CC1(C)CCC(CC2=CC=C(Cl)C=C2)C1(O)CN1C=NC=N1	C17H22ClN3O	319.84	3.74	3.59332	3.74	3.59332	0
Metformin	657-24-9	XZWYZXLIPXDOLR-UHFFFAOYSA-N	3949	4091	CN(C)C(=N)NC(N)=N	C4H11N5	129.17	-1.37	-0.918429	-3.36	-5.6177	2
Methacrylamide	79-39-0	FQPSGWSUVKBHSU-UHFFFAOYSA-N	6346	6595	CC(=C)C(N)=O	C4H7NO	85.11	-0.12	0.121555	-0.12	0.121555	0
Methimazol	60-56-0	PMRYVIKBURPHAH-UHFFFAOYSA-N	1131173	1349907	CN1C=CNC1=S	C4H6N2S	114.17	-0.11	0.74567	-0.11	0.74528	0
Methiocarb	2032-65-7	YFBPRJGDJKVWAH-UHFFFAOYSA-N	15417	16248	CNC(=O)Oc1cc(C)c(SC)c(C)c1	C11H15NO2S	225.31	2.86	3.1257	2.86	3.1257	0
Methomyl	16752-77-5	UHXUZOCRWCRNSJ-UHFFFAOYSA-N	3966	4109	CNC(=O)ON=C(C)SC	C5H10N2O2S	162.21	0.55	0.719681	0.55	0.719681	0
Methotrexate	59-05-2	FBOZXECLQNJBKD-ZDUSSCGKSA-N	112728	126941	CN(Cc1cnc2nc(N)nc(N)c2n1)c1ccc(cc1)C(=O)N[C@@H](CCC(O)=O)C(O)=O	C20H22N8O5	454.45	-0.56	-0.236544	-5.1	-6.56369	-2
Methylchloroisothiazolinone	26172-55-4	DHNRXBZYEKSXIM-UHFFFAOYSA-N	30800	33344	Cn1sc(Cl)cc1=O	C4H4ClNOS	149.6	1.12	1.35131	1.12	1.35131	0
Methylparaben	99-76-3	LXCFILQKKLGQFO-UHFFFAOYSA-N	7176, 94748	105001, 54675830, 7456	COC(=O)c1ccc(O)cc1	C8H8O3	152.15	2.14	1.67316	2.12	1.64042	-0.07
Methyltriphenylphosphonium	1779-49-3	AZFQCTBZOPUVOW-UHFFFAOYSA-N	67087	74506	C[P+](C1=CC=CC=C1)(C1=CC=CC=C1)C1=CC=CC=C1	C19H18P	278.34	0.73	4.73157	0.73	4.73157	0
Metolachlor	51218-45-2	WVQBLGZPHOPPFO-UHFFFAOYNA-N	4025	4169	CCc1cccc(C)c1N(C(C)COC)C(=O)CCl	C15H22ClNO2	283.8	3.22	3.45338	3.22	3.45338	0
Metolachlor ESA	171118-09-5	CIGKZVUEZXGYSV-UHFFFAOYNA-N	4932269		CCc1cccc(C)c1N(C(C)COC)C(=O)CS(O)(=O)=O	C15H23NO5S	329.41	0.16	2.11356	-3.34	-0.262842	-1
Metolachlor OA	152019-73-3	LNOOSYCKMKZOJB-UHFFFAOYNA-N	21170688	15842092	CCc1cccc(C)c1N(C(C)COC)C(=O)C(O)=O	C15H21NO4	279.34	2.03	2.87563	-1.68	-0.567502	-1
Metolachlor-NOA 413173	1418095-19-8	WOXWIWNBIJDJHI-JTQLQIEISA-N	57334360	71312478	CCC1=CC=CC(C)=C1N([C@@H](C)C(O)=O)C(=O)CS(O)(=O)=O	C14H19NO6S	329.37	-0.2	1.7907	-4.95	-3.86859	-2
Metoprolol	37350-58-6	IUBSYMUCCVWXPE-UHFFFAOYNA-N	4027	4171	COCCc1ccc(OCC(O)CNC(C)C)cc1	C15H25NO3	267.37	1.85	1.75866	-0.59	-0.466582	0.99
Metoprolol acid	56392-14-4	PUQIRTNPJRFRCZ-UHFFFAOYNA-N	56653	62936	CC(C)NCC(O)COC1=CC=C(CC(O)=O)C=C1	C14H21NO4	267.33	1.35	-1.2404	-1.15	-1.24162	-0.01
Metribuzin	21087-64-9	FOXFZRUHNHCZPX-UHFFFAOYSA-N	28287	30479	CSc1nnc(c(=O)n1N)C(C)(C)C	C8H14N4OS	214.29	1.5	1.96112	1.5	1.96111	0
Miconazole	22916-47-8	BYBLEWFAAKGYCD-UHFFFAOYNA-N	4044	4189	Clc1ccc(COC(Cn2ccnc2)c2ccc(Cl)cc2Cl)c(Cl)c1	C18H14Cl4N2O	416.14	6.2	5.95637	6.04	5.89066	0.19
Mirtazapine	61337-67-5	RONZAEMNMFQXRA-UHFFFAOYNA-N	4060	4205	CN1CCN2C(C1)c1ccccc1Cc1cccnc21	C17H19N3	265.36	3.01	3.20798	2.08	3.13391	0.14
Monensin	17090-79-8	GAOZTHIDHYLHMS-UHFFFAOYNA-N	389937	28263	CCC1(CCC(O1)C1(C)CCC2(CC(O)C(C)C(O2)C(C)C(OC)C(C)C(O)=O)O1)C1OC(CC1C)C1OC(O)(CO)C(C)CC1C	C36H62O11	670.89	3.5	4.81627	0.79	1.80765	-1
Montelukast	158966-92-8	UCHDWCPVSPXUMX-UHFFFAOYNA-N	4099	4248	CC(C)(O)C1=CC=CC=C1CCC(SCC1(CC(O)=O)CC1)C1=CC=CC(C=CC2=NC3=C(C=CC(Cl)=C3)C=C2)=C1	C35H36ClNO3S	586.19	7.56	8.49353	5.33	5.79545	-1
Musk ambrette	83-66-9	SUAUILGSCPYJCS-UHFFFAOYSA-N	6496	6753	COc1c(c(C)c(cc1C(C)(C)C)N(=O)=O)N(=O)=O	C12H16N2O5	268.27	3.73	3.75402	3.73	3.75402	0
Musk-xylene	81-15-2	XMWRWTSZNLOZFN-UHFFFAOYSA-N	56123	62329	Cc1c(c(C)c(c(c1N(=O)=O)C(C)(C)C)N(=O)=O)N(=O)=O	C12H15N3O6	297.27	4.12	4.3651	4.12	4.3651	0
Myclobutanil	88671-89-0	HZJKXKUJVSEEFU-UHFFFAOYNA-N	6096	6336	CCCCC(Cn1cncn1)(C#N)c1ccc(Cl)cc1	C15H17ClN4	288.78	3.19	3.65809	3.19	3.65808	0
Mycophenolic acid	24280-93-1	HPNSFSBZBAHARI-RUDMXATFSA-N	393865	446541	COc1c(C)c2COC(=O)c2c(O)c1C\C=C(/C)CCC(O)=O	C17H20O6	320.35	3.43	3.5276	1.14	0.174043	-1
N-Acetyl mesalazine	51-59-2	GEFDRROBUCULOD-UHFFFAOYSA-N	58958	65512	CC(=O)NC1=CC=C(O)C(=C1)C(O)=O	C9H9NO4	195.18	1.63	1.21497	-1.51	-2.29102	-1
N-Acetyl-4-aminoantipyrine	83-15-8	OIAGWXKSCXPNNZ-UHFFFAOYSA-N	59166	65743	CC(=O)Nc1c(C)n(C)n(-c2ccccc2)c1=O	C13H15N3O2	245.28	0.07	0.153813	0.08	0.15381	0
N-Butylbenzenesulfonamide	3622-84-2	IPRJXAGUEGOFGG-UHFFFAOYSA-N	18156	19241	CCCCNS(=O)(=O)c1ccccc1	C10H15NO2S	213.3	1.85	2.12685	1.85	2.12622	0
N-cyclohexyl-2-benzothiazole-amine	28291-75-0	UPWPIFMHSFSVLE-UHFFFAOYSA-N	514454	591790	C1CCC(CC1)NC1=NC2=CC=CC=C2S1	C13H16N2S	232.35	4.01	4.06977	4.01	4.06973	0
N-cyclohexyl-2-benzothiazole-sulfenamide	16170-33-5	STSDHUBQQWBRBH-UHFFFAOYSA-N	86989	96366	O=S(=O)(NC1CCCCC1)C1=NC2=CC=CC=C2S1	C13H16N2O2S2	296.4	3.46	3.4267	3.46	3.17749	-0.49
N-Ethyl-o-toluenesulfonamide	1077-56-1	NATWUQFQFMZVMT-UHFFFAOYSA-N	13488	14110	CCNS(=O)(=O)C1=CC=CC=C1C	C9H13NO2S	199.27	1.56	1.67318	1.56	1.67279	0
N-Formyl-4-aminoantipyrine	1672-58-8	WSJBSKRPKADYRQ-UHFFFAOYSA-N	65525	72666	Cc1c(NC=O)c(=O)n(-c2ccccc2)n1C	C12H13N3O2	231.26	-0.25	0.105114	-0.25	0.105112	0
N-Methyl-2-pyrrolidone	872-50-4	SECXISVLQFMRJM-UHFFFAOYSA-N	10780358, 12814, 13709831, 13709849, 14572285	13387	CN1CCCC1=O	C5H9NO	99.13	-0.34	-0.355933	-0.34	-0.355933	0
N-Nitrosodimethylamine	62-75-9	UMFJAHHVKNCGLG-UHFFFAOYSA-N	5894	6124	CN(C)N=O	C2H6N2O	74.08	-0.22	0.0386138	-0.22	0.0386036	0
N-Nitrosomorpholine	59-89-2	ZKXDGKXYMTYWTB-UHFFFAOYSA-N	5823	6046	O=NN1CCOCC1	C4H8N2O2	116.12	-0.25	-0.179887	-0.25	-0.179891	0
N,N-Bis(carboxymethyl)-L-glutamic acid	58976-65-1	VCVKIIDXVWEWSZ-YFKPBYRVSA-N	18732593	18711581	OC(=O)CC[C@H](N(CC(O)=O)CC(O)=O)C(O)=O	C9H13NO8	263.21	-1.79	-2.43196	-7.28	-14.1772	-3
N,N-Dimethyldodecylamine N-oxide	1643-20-5	SYELZBGXAIXKHU-UHFFFAOYSA-N	14688	15433	CCCCCCCCCCCC[N](C)(C)=O	C14H31NO	229.41	1.99	3.94624	1.99	3.9462	0
N,N-Dimethylsulfamide	3984-14-3	QMHAHUAQAJVBIW-UHFFFAOYSA-N	118532, 13299749	134472	CN(C)S(N)(=O)=O	C2H8N2O2S	124.16	-1.1	-1.54395	-1.1	-1.54395	0
Naproxen	22204-53-1	CMWTZPSULFXXJA-UHFFFAOYNA-N	1262, 137720	1302, 156391	COc1ccc2cc(ccc2c1)C(C)C(O)=O	C14H14O3	230.27	2.98	2.98579	0.83	-0.0542112	-1
Nicosulfuron	111991-09-4	RTCOGUMHFFWOJV-UHFFFAOYSA-N	66024	73281	COc1cc(OC)nc(NC(=O)NS(=O)(=O)c2ncccc2C(=O)N(C)C)n1	C15H18N6O6S	410.41	-0.31	0.77921	-2.3	-0.151265	-1
Nitrendipin	39562-70-4	PVHUJELLJLJGLN-UHFFFAOYNA-N	4351	4507	CCOC(=O)C1=C(C)NC(C)=C(C1C1=CC=CC(=C1)[N+]([O-])=O)C(=O)OC	C18H20N2O6	360.37	3.76	2.1723	3.76	2.1723	0
Nitrofurantoin	67-20-9	NXFQHRVNIOXGAQ-YCRREMRBSA-N	5036498	6604200	[O-][N+](=O)C1=CC=C(O1)\C=N\N1CC(=O)NC1=O	C8H6N4O5	238.16	-0.03	-0.22145	-0.14	-0.280235	-0.13
Norethindrone	68-22-4	VIKNJXKGJWUCNN-XGXHKTLJSA-N	5994	6230	C[C@]12CC[C@H]3[C@@H](CCC4=CC(=O)CC[C@H]34)[C@@H]1CC[C@@]2(O)C#C	C20H26O2	298.43	2.98	3.21723	2.98	3.21723	0
Norfloxacin	70458-96-7	OGJPXUAPXNRGGI-UHFFFAOYSA-N	4380	4539	CCn1cc(C(O)=O)c(=O)c2cc(F)c(cc12)N1CCNCC1	C16H18FN3O3	319.34	-0.57	-0.92049	-2.99	-0.92004	-0.01
Norgestimate	35189-28-7	KIQQMECNKUGGKA-NMYWJIRASA-N	5022837	6540478	CC[C@]12CC[C@H]3[C@@H](CCC4=C\C(CC[C@H]34)=N\O)[C@@H]1CC[C@@]2(OC(C)=O)C#C	C23H31NO3	369.51	4.84	4.1124	4.84	4.11234	0
Norgestrel	6533-00-2	WWYNJERNGUHSAO-CULCCENASA-N	10481953	16051930	[H][C@@]12CCC(O)(C#C)[C@@]1(CC)CC[C@]1([H])[C@@]3([H])CCC(=O)C=C3CC[C@@]21[H]	C21H28O2	312.46	3.32	3.6618	3.32	3.6618	0
Norharmane	95-53-4	AIFRHYZBTHREPW-UHFFFAOYSA-N	58486	64961	N1C2=C(C=CC=C2)C2=C1C=NC=C2	C11H8N2	168.2	2.78	1.87321	1.88	1.87024	0.01
o-Toluidine	95-53-4	RNVCVTLRINQCPJ-UHFFFAOYSA-N	11599532, 13670293, 13854136, 14542645, 14879115, 15170934, 15563581	7242	Cc1ccccc1N	C7H9N	107.16	1.47	1.65774	1.47	1.65722	0
Octocrylene	6197-30-4	FMJSMJQBSVNSBF-UHFFFAOYNA-N	21165	22571	CCCCC(CC)COC(=O)C(C#N)=C(c1ccccc1)c1ccccc1	C24H27NO2	361.49	6.34	6.78295	6.34	6.78295	0
Octyl-methoxycinnamate	5466-77-3	YBGZDTIWKVFICR-JLHYYAGUNA-N	4511170	5355130	CCCCC(CC)COC(=O)\C=C\c1ccc(OC)cc1	C18H26O3	290.41	5.19	5.38022	5.19	5.38022	0
Ofloxacin	82419-36-1	GSDSWSVVBLHKDQ-UHFFFAOYNA-N	4422	4583	CC1COc2c(N3CCN(C)CC3)c(F)cc3c2n1cc(C(O)=O)c3=O	C18H20FN3O4	361.38	0.17	0.65428	-1.88	-0.282511	-0.91
Ondansetron	99614-02-5	FELGMEQIXOGIFQ-UHFFFAOYNA-N	4434	4595	CN1C2=C(C3=CC=CC=C13)C(=O)C(CN1C=CN=C1C)CC2	C18H19N3O	293.37	2.79	2.34997	2.17	2.10695	0.47
Orlistat	96829-58-2	AHLBNYSZXLDEJQ-FWEHEUNISA-N	2298564	3034010	CCCCCCCCCCC[C@@H](C[C@@H]1OC(=O)[C@H]1CCCCCC)OC(=O)[C@H](CC(C)C)NC=O	C29H53NO5	495.75	8.96	8.10658	8.96	8.10658	0
Oryzalin	19044-88-3	UNAHYJYOSSSJHH-UHFFFAOYSA-N	27326	29393	CCCN(CCC)C1=C(C=C(C=C1[N+]([O-])=O)S(N)(=O)=O)[N+]([O-])=O	C12H18N4O6S	346.36	2.59	2.32595	2.59	2.32326	-0.01
Oxadiazone	19666-30-9	CHNUNORXWHYHNE-UHFFFAOYSA-N	27628	29732	CC(C)OC1=CC(N2N=C(OC2=O)C(C)(C)C)=C(Cl)C=C1Cl	C15H18Cl2N2O3	345.23	4.51	5.31241	4.51	5.31241	0
Oxazepam	604-75-1	ADIMAYPTOBDMTL-UHFFFAOYNA-N	4455	4616	OC1N=C(c2ccccc2)c2cc(Cl)ccc2NC1=O	C15H11ClN2O2	286.72	2.06	2.92328	2.06	2.92301	0
Oxybutynin	5633-20-5	XIQVNETUBQGFHX-UHFFFAOYNA-N	4473	4634	CCN(CC)CC#CCOC(=O)C(O)(C1CCCCC1)C1=CC=CC=C1	C22H31NO3	357.5	4.62	4.43808	3.36	3.05531	0.96
Oxypurinol	2465-59-0	HXNFUBHNUDHIGC-UHFFFAOYSA-N	4483	4644	O=C1NC(=O)C2=CNNC2=N1	C5H4N4O2	152.11	-1.16	-1.67001	-1.33	-2.78229	0.05
p-Chlorocresol	59-50-7	CFKMVGJGLGKFKI-UHFFFAOYSA-N	21106018	1732	Cc1cc(O)ccc1Cl	C7H7ClO	142.59	2.83	2.78715	2.83	2.77831	-0.02
p-Toluenesulfonamide	70-55-3	LMYRWZFENFIFIT-UHFFFAOYSA-N	6033	6269	Cc1ccc(cc1)S(N)(=O)=O	C7H9NO2S	171.22	0.91	1.0927	0.91	1.09236	0
Paramethasone	53-33-8	MKPDWECBUAZOHP-NKTJFBRMSA-N	5664	5875	[H][C@@]12C[C@@H](C)[C@](O)(C(=O)CO)[C@@]1(C)C[C@H](O)[C@@]1([H])[C@@]2([H])C[C@H](F)C2=CC(=O)C=C[C@]12C	C22H29FO5	392.47	1.77	1.29824	1.77	1.29824	0
Parathion-methyl	298-00-0	RLBIQVVOMOPOHC-UHFFFAOYSA-N	3987	4130	COP(=S)(OC)OC1=CC=C(C=C1)[N+]([O-])=O	C8H10NO5PS	263.21	2.94	2.60159	2.94	2.60159	0
Paroxetine	61869-08-7	AHOUBRCZNHFOSL-UHFFFAOYNA-N	39888	43815	Fc1ccc(cc1)C1CCNCC1COc1ccc2OCOc2c1	C19H20FNO3	329.37	3.68	3.14825	1.14	0.826752	1
Pendimethalin	40487-42-1	CHIFOSRWCNZCFN-UHFFFAOYSA-N	35265	38479	CCC(CC)Nc1c(cc(C)c(C)c1[N+]([O-])=O)[N+]([O-])=O	C13H19N3O4	281.31	4.83	4.82126	4.83	4.82095	0
Pentoxifylline	6493-05-06	BYPFEZZEUUWMEJ-UHFFFAOYSA-N	4578	4740	CN1C=NC2=C1C(=O)N(CCCCC(C)=O)C(=O)N2C	C13H18N4O3	278.31	0.54	0.232206	0.54	0.232206	0
Perfluorobutanoic acid	375-22-4	YPJUNDFVDDCYIH-UHFFFAOYSA-N	9394	9777	OC(=O)C(F)(F)C(F)(F)C(F)(F)F	C4HF7O2	214.04	2.62	2.31027	-1.13	-1.21852	-1
Perfluorodecanoic acid	335-76-2	PCIUEQPBYFRTEM-UHFFFAOYSA-N	9181	9555	OC(=O)C(F)(F)C(F)(F)C(F)(F)C(F)(F)C(F)(F)C(F)(F)C(F)(F)C(F)(F)C(F)(F)F	C10HF19O2	514.09	7.37	6.51412	3.62	2.98466	-1
Perfluoroheptanoic acid	375-85-9	ZWBAMYVPMDSJGQ-UHFFFAOYSA-N	61135	67818	OC(=O)C(F)(F)C(F)(F)C(F)(F)C(F)(F)C(F)(F)C(F)(F)F	C7HF13O2	364.06	4.86	4.4122	1.11	0.882729	-1
Perfluorohexanoic acid	307-24-4	PXUULQAPEKKVAH-UHFFFAOYSA-N	60864	67542	OC(=O)C(F)(F)C(F)(F)C(F)(F)C(F)(F)C(F)(F)F	C6HF11O2	314.06	3.9	3.71155	0.15	0.182096	-1
Perfluorooctanesulfonamide	754-91-6	RRRXPPIDPYTNJG-UHFFFAOYSA-N	62984	69785	NS(=O)(=O)C(F)(F)C(F)(F)C(F)(F)C(F)(F)C(F)(F)C(F)(F)C(F)(F)C(F)(F)F	C8H2F17NO2S	499.14	5.53	4.85495	5.24	3.91232	-1
Perfluorooctanesulfonic acid	1763-23-1	YFSUTJLHUFNCNZ-UHFFFAOYSA-N	67068	74483	OS(=O)(=O)C(F)(F)C(F)(F)C(F)(F)C(F)(F)C(F)(F)C(F)(F)C(F)(F)C(F)(F)F	C8HF17O3S	500.13	4.16	5.42983	0.66	3.05343	-1
Perfluorooctanoic acid	335-67-1	SNGREZUHAYWORS-UHFFFAOYSA-N	9180	9554	OC(=O)C(F)(F)C(F)(F)C(F)(F)C(F)(F)C(F)(F)C(F)(F)C(F)(F)F	C8HF15O2	414.07	5.57	5.11284	1.82	1.58337	-1
Perfluorotetradecanoic acid	376-06-7	RUDINRUXCKIXAJ-UHFFFAOYSA-N	61139	67822	OC(=O)C(F)(F)C(F)(F)C(F)(F)C(F)(F)C(F)(F)C(F)(F)C(F)(F)C(F)(F)C(F)(F)C(F)(F)C(F)(F)C(F)(F)C(F)(F)F	C14HF27O2	714.12	9.52	9.3167	5.77	5.78723	-1
Pethoxamid	106700-29-2	CSWIKHNSBZVWNQ-UHFFFAOYSA-N	4953376	6450826	CCOCCN(C(=O)CCl)C(=C(C)C)c1ccccc1	C16H22ClNO2	295.81	3.4	2.83892	3.4	2.83892	0
Phantolide	15323-35-0	VDBHOHJWUDKDRW-UHFFFAOYNA-N	42929	47167	CC1C(C)(C)c2cc(C)c(cc2C1(C)C)C(C)=O	C17H24O	244.38	5.28	4.51315	5.28	4.51315	0
Phenazone	60-80-0	VEQOALNAAJBPNY-UHFFFAOYSA-N	14513915, 2121	2206	Cc1cc(=O)n(-c2ccccc2)n1C	C11H12N2O	188.23	0.72	1.21897	0.72	1.21897	0
Phenylbenzimidazole sulfonic acid	27503-81-7	UVCJGUGAGLDPAA-UHFFFAOYSA-N	31267	33919, 1712019	OS(=O)(=O)c1ccc2[nH]c(nc2c1)-c1ccccc1	C13H10N2O3S	274.3	0.54	-0.140863	-2.95	0.088458	-1
Phthalamic acid	88-97-1	CYMRPDYINXWJFU-UHFFFAOYSA-N	6691	6957	NC(=O)C1=CC=CC=C1C(O)=O	C8H7NO3	165.15	0.4	0.481469	-2.55	-2.83525	-1
Phthalimide	85-41-6	XKJCHHZQLQNZHY-UHFFFAOYSA-N	6550	6809	O=C1NC(=O)C2=CC=CC=C12	C8H5NO2	147.13	1	0.693423	1	0.65268	-0.09
Picloram	1918-02-01	NQQVFXUMIDALNH-UHFFFAOYSA-N	15170	15965	NC1=C(Cl)C(Cl)=NC(C(O)=O)=C1Cl	C6H3Cl3N2O2	241.46	2.59	2.00239	-0.55	-1.23035	-1
Picolinafen	137641-05-5	CWKFPEBMTGKLKX-UHFFFAOYSA-N	2542991	3294375	Fc1ccc(NC(=O)c2cccc(Oc3cccc(c3)C(F)(F)F)n2)cc1	C19H12F4N2O2	376.31	3.84	5.3486	3.84	5.34859	0
Picoxystrobin	117428-22-5	IBSNKSODLGJUMQ-SDNWHVSQSA-N	9460644	11285653	CO\C=C(\C(=O)OC)C1=CC=CC=C1COC1=CC=CC(=N1)C(F)(F)F	C18H16F3NO4	367.33	3.84	4.30996	3.84	4.30996	0
Pindolol	13523-86-9	JZQKKSLKJUAGIC-UHFFFAOYNA-N	4662	4828	CC(C)NCC(O)COc1cccc2[nH]ccc12	C14H20N2O2	248.33	1.86	1.69298	-0.65	-0.532257	0.99
Pioglitazone	111025-46-8	HYAFETHFCAUJAY-UHFFFAOYNA-N	4663	4829	CCC1=CN=C(CCOC2=CC=C(CC3SC(=O)NC3=O)C=C2)C=C1	C19H20N2O3S	356.44	2.58	3.46154	1.84	2.74277	-0.84
Pipamperone	1893-33-0	AXKPFOAXAHJUAG-UHFFFAOYSA-N	4664	4830	NC(=O)C1(CCN(CCCC(=O)C2=CC=C(F)C=C2)CC1)N1CCCCC1	C21H30FN3O2	375.49	2.45	1.86713	1.25	0.539895	0.91
Piperonyl butoxide	51-03-6	FIPWRIJSWJWJAI-UHFFFAOYSA-N	5590	5794	CCCCOCCOCCOCc1cc2OCOc2cc1CCC	C19H30O5	338.45	4	4.10476	3.99	4.10476	0
Pirimicarb	23103-98-2	YFGYUFNIOHWBOB-UHFFFAOYSA-N	29348	31645	CN(C)C(=O)Oc1nc(nc(C)c1C)N(C)C	C11H18N4O2	238.29	1.73	1.79688	1.73	1.7952	0
Pirimiphos-methyl	29232-93-7	QHOQHJPRIBSPCY-UHFFFAOYSA-N	31773	34526	CCN(CC)c1nc(C)cc(OP(=S)(OC)OC)n1	C11H20N3O3PS	305.33	3.93	2.96437	3.93	2.96229	0
Pravastatin	81093-37-0	TUZYXOIXSAXUGO-UHFFFAOYNA-N	4720, 49398, 8048791	4889, 54687, 9873102	CCC(C)C(=O)OC1CC(O)C=C2C=CC(C)C(CCC(O)CC(O)CC(O)=O)C12	C23H36O7	424.54	2.33	1.64709	-0.42	-1.37796	-1
Prednisolone	50-24-8	OIGNJSKKLXVSLS-VWUMJDOOSA-N	5552	5755	C[C@]12C[C@H](O)[C@H]3[C@@H](CCC4=CC(=O)C=C[C@]34C)[C@@H]1CC[C@]2(O)C(=O)CO	C21H28O5	360.45	1.66	1.27299	1.66	1.27299	0
Prednisone	53-03-2	XOFYZVNMUHMLCC-YBVPEPTOSA-N	5656	5865	[H][C@@]12CC[C@](O)(C(=O)CO)[C@@]1(C)CC(=O)[C@@]1([H])[C@@]2([H])CCC2=CC(=O)C=C[C@]12C	C21H26O5	358.44	1.64	1.6585	1.64	1.6585	0
Pregnanediol	80-92-2	YWYQTGBBEZQBGO-BERLURQNSA-N	190585	219833	C[C@H](O)[C@H]1CC[C@H]2[C@@H]3CC[C@@H]4C[C@H](O)CC[C@]4(C)[C@H]3CC[C@]12C	C21H36O2	320.52	4.18	3.77944	4.18	3.77944	0
Primidone	125-33-7	DQMZLTXERSFNPB-UHFFFAOYSA-N	4740	4909	CCC1(C(=O)NCNC1=O)c1ccccc1	C12H14N2O2	218.26	0.61	1.1183	0.61	1.11827	0
Prochloraz	67747-09-5	TVLSRXXIMLFWEO-UHFFFAOYSA-N	159925	73665	CCCN(CCOc1c(Cl)cc(Cl)cc1Cl)C(=O)n1ccnc1	C15H16Cl3N3O2	376.67	4.08	3.62391	4.08	3.6239	0
Procymidone	32809-16-8	QXJKBPAVAHBARF-UHFFFAOYNA-N	33326	36242	CC12CC1(C)C(=O)N(C2=O)C1=CC(Cl)=CC(Cl)=C1	C13H11Cl2NO2	284.14	2.89	3.38596	2.89	3.38596	0
Progesterone	57-83-0	RJKFOVLPORLFTN-LEKSSAKUSA-N	3902	4042	CC(=O)[C@H]1CC[C@H]2[C@@H]3CCC4=CC(=O)CC[C@]4(C)[C@H]3CC[C@]12C	C21H30O2	314.47	3.72	4.1486	3.72	4.1486	0
Promethazin	60-87-7	PWWVAXIEGOYWEE-UHFFFAOYNA-N	4758	4927	CC(CN1c2ccccc2Sc2ccccc12)N(C)C	C17H20N2S	284.42	4.58	4.28757	2.72	2.63733	0.98
Propachlor	1918-16-7	MFOUDYKPLGXPGO-UHFFFAOYSA-N	4762	4931	CC(C)N(C(=O)CCl)c1ccccc1	C11H14ClNO	211.69	2.28	2.38575	2.28	2.38575	0
Propamocarb	24579-73-5	WZZLDXDUQPOXNW-UHFFFAOYSA-N	30114	32490	CCCOC(=O)NCCCN(C)C	C9H20N2O2	188.27	1.15	0.770613	-1.04	-1.12198	0.99
Propanil	709-98-8	LFULEKSKNZEWOE-UHFFFAOYSA-N	4764	4933	CCC(=O)NC1=CC(Cl)=C(Cl)C=C1	C9H9Cl2NO	218.08	3.34	3.11958	3.34	3.11958	0
Propiconazole	60207-90-1	STJLVHWMYQXCPB-UHFFFAOYNA-N	39402	43234	CCCC1COC(Cn2cncn2)(O1)c1ccc(Cl)cc1Cl	C15H17Cl2N3O2	342.23	3.52	4.32552	3.52	4.32552	0
Propoxycarbazone	145026-81-9	JTHMVYBOQLDDIY-UHFFFAOYSA-N	154427	53432386	CCCOc1nn(C(=O)NS(=O)(=O)c2ccccc2C(=O)OC)c(=O)n1C	C15H18N4O7S	398.39	0.63	2.02422	-1.33	1.0816	-1
Propranolol	525-66-6	AQHHHDLHHXJYJD-UHFFFAOYNA-N	4777	4946	CC(C)NCC(O)COc1cccc2ccccc12	C16H21NO2	259.35	3.26	2.5837	0.81	0.358457	0.99
Propylparaben	94-13-3	QELSKZZBTMNZEB-UHFFFAOYSA-N	6907	7175	CCCOC(=O)c1ccc(O)cc1	C10H12O3	180.21	2.87	2.55249	2.85	2.51953	-0.07
Propyphenazone	479-92-5	PXWLVJLKJGVOKE-UHFFFAOYSA-N	3646	3778	CC(C)c1c(C)n(C)n(-c2ccccc2)c1=O	C14H18N2O	230.31	2.14	2.34611	2.14	2.34611	0
Propyzamide	23950-58-5	PHNUZKMIPFFYSO-UHFFFAOYSA-N	29822	32154	CC(C)(NC(=O)C1=CC(Cl)=CC(Cl)=C1)C#C	C12H11Cl2NO	256.13	3.42	3.18089	3.42	3.18089	0
Prosulfocarb	52888-80-9	NQLVQOSNDJXLKG-UHFFFAOYSA-N	55867	62020	CCCN(CCC)C(=O)SCc1ccccc1	C14H21NOS	251.39	4.1	4.17034	4.1	4.17034	0
Prothioconazole-desthio	120983-64-4	HHUQPWODPBDTLI-UHFFFAOYNA-N	106612	119361	OC(Cc1ccccc1Cl)(Cn1cncn1)C1(Cl)CC1	C14H15Cl2N3O	312.2	3.06	2.67902	3.06	2.67902	0
Pyraclostrobin	175013-18-0	HZRSNVGNWUDEFX-UHFFFAOYSA-N	4928348	6422843	CON(C(=O)OC)C1=C(COC2=NN(C=C2)C2=CC=C(Cl)C=C2)C=CC=C1	C19H18ClN3O4	387.83	4.07	4.69654	4.07	4.69654	0
Pyrazophos	13457-18-6	JOOMJVFZQRQWKR-UHFFFAOYSA-N	24247	26033	CCOC(=O)c1cn2nc(OP(=S)(OCC)OCC)cc2nc1C	C14H20N3O5PS	373.37	3.6	3.14106	3.6	3.14106	0
Pyrithione	1121-31-9	YBBJKCMMCRQZMA-UHFFFAOYSA-N	1514	1570	On1ccccc1=S	C5H5NOS	127.16	-0.13	0.90355	-2.43	0.845296	-0.13
Quinmerac	90717-03-6	ALZOLUNSQWINIR-UHFFFAOYSA-N	82847	91749	CC1=CC2=C(N=C1)C(C(O)=O)=C(Cl)C=C2	C11H8ClNO2	221.64	2.77	2.68092	-0.32	-0.445532	-1
Quinoxyfen	124495-18-7	WRPIRSINYZBGPK-UHFFFAOYSA-N	2635909	3391107	Fc1ccc(Oc2ccnc3cc(Cl)cc(Cl)c23)cc1	C15H8Cl2FNO	308.14	5.62	4.98198	5.62	4.98184	0
Raloxifene	84449-90-1	GZUITABIAKMVPG-UHFFFAOYSA-N	4859	5035	OC1=CC=C(C=C1)C1=C(C(=O)C2=CC=C(OCCN3CCCCC3)C=C2)C2=C(S1)C=C(O)C=C2	C28H27NO4S	473.59	5.57	5.69263	4.05	5.33663	0.74
Ranitidine	66357-35-5	VMXUWOKSQNHOCA-UKTHLTGXSA-N	571454	3001055	CN\C(NCCSCc1ccc(CN(C)C)o1)=C/[N+]([O-])=O	C13H22N4O3S	314.41	0.37	0.981478	-1	0.448349	0.71
Risperidone	106266-06-2	RAPZEAPATHNIPO-UHFFFAOYSA-N	4895	5073	Cc1nc2CCCCn2c(=O)c1CCN1CCC(CC1)c1noc2cc(F)ccc12	C23H27FN4O2	410.5	2.6	2.62762	1.45	1.24918	0.96
Ropinirole	91374-21-9	UHSKFQJFRQCDBE-UHFFFAOYSA-N	4916	5095	CCCN(CCC)CCC1=C2CC(=O)NC2=CC=C1	C16H24N2O	260.38	3.21	2.96921	0.86	0.361754	1
Roxithromycin	80214-83-1	RXZBMPWDPOLZGW-HEWSMUCTSA-N	392060, 7842291	9567573, 5480431	CC[C@H]1OC(=O)[C@H](C)[C@@H](O[C@H]2C[C@@](C)(OC)[C@@H](O)[C@H](C)O2)[C@H](C)[C@@H](O[C@@H]2O[C@H](C)C[C@@H]([C@H]2O)N(C)C)[C@](C)(O)C[C@@H](C)C(=NOCOCCOC)[C@H](C)[C@@H](O)[C@]1(C)O	C41H76N2O15	837.07	3.55	2.99998	2.46	1.31624	0.98
Saccharin	81-07-2	CVHZOJJKTDOEJC-UHFFFAOYSA-N	4959	5143	O=C1NS(=O)(=O)c2ccccc12	C7H5NO3S	183.18	0.7	0.448814	-1.3	-0.494119	-1
Scopolamine-N-butyl	149-64-4	HOZOZZFCZRXYEK-GXLSIKBRSA-M	8653	9003	[Br-].CCCC[N+]1(C)[C@H]2CC(C[C@H]1[C@@H]1O[C@H]21)OC(=O)C(CO)C1=CC=CC=C1	C21H30BrNO4	440.38	-1.66	-1.94349	-1.66	-1.94349	0
Sertraline	79617-96-2	VGKDLMBJGBXTGI-SJCJKPOMSA-N	61881	68617	CN[C@H]1CC[C@@H](c2ccc(Cl)c(Cl)c2)c2ccccc12	C17H17Cl2N	306.24	5.18	5.1493	2.8	3.01789	0.99
Simazine	122-34-9	ODCWYMIRDDJXKW-UHFFFAOYSA-N	5027	5216	CCNc1nc(Cl)nc(NCC)n1	C7H12ClN5	201.66	2.29	1.78103	2.29	1.781	0
Simetryn	1014-70-6	MGLWZSOBALDPEK-UHFFFAOYSA-N	13303	13905	CCNc1nc(NCC)nc(SC)n1	C8H15N5S	213.3	2.63	2.17948	2.63	2.16954	0.02
Sotalol	3930-20-9	ZBMZVLHSJCTVON-UHFFFAOYNA-N	5063	5253	CC(C)NCC(O)c1ccc(NS(C)(=O)=O)cc1	C12H20N2O3S	272.36	0.29	-0.395064	-1.97	-2.1218	0.99
Spiroxamine	118134-30-8	PUYXTUJWRLOUCW-UHFFFAOYNA-N	77719	86160	CCCN(CC)CC1COC2(CCC(CC2)C(C)(C)C)O1	C18H35NO2	297.49	4.78	4.38154	3.01	2.44669	0.99
Sucralose	56038-13-2	BAQAVOSOZGMPRM-UHFFFAOYNA-N	64561	71485	OCC1OC(OC2(CCl)OC(CCl)C(O)C2O)C(O)C(O)C1Cl	C12H19Cl3O8	397.64	-0.17	-0.465059	-0.17	-0.465073	0
Sulcotrione	99105-77-8	PQTBTIFWAXVEPB-UHFFFAOYSA-N	82858	91760	CS(=O)(=O)c1ccc(C(=O)C2C(=O)CCCC2=O)c(Cl)c1	C14H13ClO5S	328.77	1.63	1.75418	-0.85	-0.344593	-1
Sulfadimethoxine	122-11-2	ZZORFUFYDOWNEF-UHFFFAOYSA-N	5132	5323	COC1=CC(NS(=O)(=O)C2=CC=C(N)C=C2)=NC(OC)=N1	C12H14N4O4S	310.33	1.46	1.26083	-0.43	0.777843	-0.76
Sulfamethazine	57-68-1	ASWVTGNCAZCNNR-UHFFFAOYSA-N	5136	5327	Cc1cc(C)nc(NS(=O)(=O)c2ccc(N)cc2)n1	C12H14N4O2S	278.33	0.44	0.650001	0.38	0.210684	-0.72
Sulfamethoxazole	723-46-6	JLKIGFTWXXRPMT-UHFFFAOYSA-N	5138	5329	Cc1cc(NS(=O)(=O)c2ccc(N)cc2)no1	C10H11N3O3S	253.28	0.65	0.790549	-0.23	0.000925873	-0.95
Sulfapyridine	144-83-2	GECHUMIMRBOMGK-UHFFFAOYSA-N	5145	5336	Nc1ccc(cc1)S(=O)(=O)Nc1ccccn1	C11H11N3O2S	249.29	0.47	1.00877	0.44	0.242027	-0.94
Sulfathiazole	72-14-0	JNMRHUJNCSQMMB-UHFFFAOYSA-N	5148	5340	NC1=CC=C(C=C1)S(=O)(=O)NC1=NC=CS1	C9H9N3O2S2	255.31	0.42	0.975028	0.22	0.503521	-0.75
Sulfolane	126-33-0	HXJUTPCZVOIRIF-UHFFFAOYSA-N	29080	31347	O=S1(=O)CCCC1	C4H8O2S	120.17	-0.55	-0.590796	-0.55	-0.590796	0
Tacrolimus	104987-11-3	QJJXYPPXXYFBGM-NYOQZLQMSA-N	4940690	6436007	CO[C@@H]1CC(CC[C@H]1O)\C=C(/C)[C@H]1OC(=O)[C@@H]2CCCCN2C(=O)C(=O)[C@]2(O)O[C@@H]([C@H](C[C@H]2C)OC)[C@H](C[C@@H](C)C\C(C)=C\[C@@H](CC=C)C(=O)C[C@H](O)[C@H]1C)OC	C44H69NO12	804.04	4.1	5.59412	4.1	5.59291	0
Tamoxifen	10540-29-1	NKANXQFJJICGDU-QPLCGJKRSA-N	2015313	2733526	CC\C(=C(/C1=CC=CC=C1)C1=CC=C(OCCN(C)C)C=C1)C1=CC=CC=C1	C26H29NO	371.53	6.82	6.35122	5.14	4.97164	0.96
TDCPP	13674-87-8	ASLWPAWFJZFCKF-UHFFFAOYSA-N	24388	26177	ClCC(CCl)OP(=O)(OC(CCl)CCl)OC(CCl)CCl	C9H15Cl6O4P	430.91	3.26	4.28002	3.26	4.28002	0
Tebuconazole	107534-96-3	PXMNMQRDXWABCY-UHFFFAOYNA-N	77680	86102	CC(C)(C)C(O)(CCc1ccc(Cl)cc1)Cn1cncn1	C16H22ClN3O	307.83	3.74	3.69207	3.74	3.69207	0
Telmisartan	144701-48-4	RMMXLENWKUUMAY-UHFFFAOYSA-N	59391	65999	CCCc1nc2c(C)cc(cc2n1Cc1ccc(cc1)-c1ccccc1C(O)=O)-c1nc2ccccc2n1C	C33H30N4O2	514.63	7	6.04085	4.17	5.02429	-0.95
Temazepam	846-50-4	SEQDDYPDSLOBDC-UHFFFAOYNA-N	5198	5391	CN1c2ccc(Cl)cc2C(=NC(O)C1=O)c1ccccc1	C16H13ClN2O2	300.75	2.11	2.78735	2.11	2.78712	0
Terbinafine	91161-71-6	DOMXUEMWDBAQBQ-WEVVVXLNSA-N	1266005	1549008	CN(C\C=C\C#CC(C)(C)C)CC1=CC=CC2=CC=CC=C12	C21H25N	291.44	6.01	5.52748	5.75	4.24813	0.97
Terbuthylazine	5915-41-3	FZXISNSWEXTPMF-UHFFFAOYSA-N	20848	22206	CCNc1nc(Cl)nc(NC(C)(C)C)n1	C9H16ClN5	229.71	2.99	2.47818	2.99	2.47815	0
Terbuthylazine-2-hydroxy	66753-07-9	OYTCZOJKXCTBHG-UHFFFAOYSA-N	4324299	5151089	CCNC1=NC(=O)N=C(NC(C)(C)C)N1	C9H17N5O	211.27	-0.39	0.277724	-0.47	0.277721	0
Terbutryn	886-50-0	IROINLKCQGIITA-UHFFFAOYSA-N	12874	13450	CCNc1nc(NC(C)(C)C)nc(SC)n1	C10H19N5S	241.36	3.35	2.87663	3.35	2.86783	0.02
Testosterone	58-22-0	MUMGGOZAMZWBJJ-DYKIIFRCSA-N	5791	6013	C[C@]12CC[C@H]3[C@@H](CCC4=CC(=O)CC[C@]34C)[C@@H]1CC[C@@H]2O	C19H28O2	288.43	3.16	3.36542	3.16	3.36542	0
Tetrabromobisphenol A	79-94-7	VEORPZCZECFIRK-UHFFFAOYSA-N	37036	6618	CC(C)(c1cc(Br)c(O)c(Br)c1)c1cc(Br)c(O)c(Br)c1	C15H12Br4O2	543.88	6.8	7.11999	6.79	5.86843	-1.64
Tetracain	94-24-6/ 136-47-0	GKCBAIGFKIBETG-UHFFFAOYSA-N	5218	5411	CCCCNC1=CC=C(C=C1)C(=O)OCCN(C)C	C15H24N2O2	264.37	3.3	2.79204	1.89	1.73604	0.91
Tetrachlorosalicylanilide	1154-59-2	SJQBHPJLLIJASD-UHFFFAOYSA-N	13743	14385	Oc1c(Cl)cc(Cl)cc1C(=O)Nc1ccc(Cl)c(Cl)c1	C13H7Cl4NO2	351.02	6.03	5.17774	5.14	3.8135	-0.97
Tetradecylsulfate	4754-44-3	URLJMZWTXZTZRR-UHFFFAOYSA-N	5058	5248	CCCCCCCCCCCCCCOS(O)(=O)=O	C14H30O4S	294.45	5.1	5.30599	1.6	2.9296	-1
Tetraglyme	143-24-8	ZUHZGEOKBKGPSW-UHFFFAOYSA-N	13835433	8925	COCCOCCOCCOCCOC	C10H22O5	222.28	-0.33	-0.0633526	-0.33	-0.0633526	0
Tetrahydrophthalimide	85-40-5	CIFFBTOJCKSRJY-UHFFFAOYNA-N	6549	6808	O=C1NC(=O)C2CC=CCC12	C8H9NO2	151.17	0.56	0.155991	0.56	0.155579	0
Tetrapropylammonium	13010-31-6	OSBSFAARYOCBHB-UHFFFAOYSA-N	9184	9559	CCC[N+](CCC)(CCC)CCC	C12H28N	187.37	-1.77	-0.454846	-1.77	-0.454846	0
Theophyllin	58-55-9	ZFXYFBGIUFBOJW-UHFFFAOYSA-N	2068	2153	CN1C2=C(NC=N2)C(=O)N(C)C1=O	C7H8N4O2	180.17	0.13	-0.769322	0.12	-0.893924	-0.28
Thiabendazole	148-79-8	WJCNZQLZVWNLKY-UHFFFAOYSA-N	4954033	5430	c1nc(cs1)-c1nc2ccccc2[nH]1	C10H7N3S	201.25	2.39	2.32892	2.39	2.32821	0
Thiacloprid	111988-49-9	HOKKPVIRMVDYPB-GXDHUFHOSA-N	103099	115224	Clc1ccc(CN2CCS\C2=N\C#N)cn1	C10H9ClN4S	252.72	1.22	2.05705	1.22	2.05705	0
Thiacloprid amide	676228-91-4	LEZHOZPJYAQQNU-UVTDQMKNSA-N	17340044	16212161	NC(=O)\N=C1/SCCN1CC1=CN=C(Cl)C=C1	C10H11ClN4OS	270.74	0.37	1.05582	0.37	1.05582	0
Thiamethoxam	153719-23-4	NWWZPOKUUAIXIW-DHZHZOJOSA-N	4712649	5821911	CN1COCN(CC2=CN=C(Cl)S2)\C1=N\[N+]([O-])=O	C8H10ClN5O3S	291.71	-0.33	1.06765	-0.33	1.06765	0
Thiophanate-methyl	23564-05-8	QGHREAKMXXNCOA-UHFFFAOYSA-N	2297683	3032791	COC(=O)NC(=S)NC1=CC=CC=C1NC(=S)NC(=O)OC	C12H14N4O4S2	342.39	1.26	2.77711	-0.95	2.484	-0.64
Thymol	89-83-8	MGSRCZKZVOBKFT-UHFFFAOYSA-N	21105998	6989	CC(C)c1ccc(C)cc1O	C10H14O	150.22	3.08	3.42811	3.08	3.42783	0
TMDD	126-86-3	LXOFYPKXCSULTL-UHFFFAOYNA-N	29095	31362	CC(C)CC(C)(O)C#CC(C)(O)CC(C)C	C14H26O2	226.36	2.94	3.16769	2.94	3.16769	0
Tonalide	1506-02-1	DNRJTBAOUJJKDY-UHFFFAOYNA-N	80719	89440	CC1CC(C)(C)c2cc(C(C)=O)c(C)cc2C1(C)C	C18H26O	258.41	5.75	4.95772	5.75	4.95772	0
Torasemide	56211-40-6	NGBFQHCMQULJNZ-UHFFFAOYSA-N	38123	41781	CC(C)NC(=O)NS(=O)(=O)C1=CN=CC=C1NC1=CC=CC(C)=C1	C16H20N4O3S	348.42	3.43	1.8639	1.47	1.11894	-0.97
TOSU	126-54-5	BGCSUUSPRCDKBQ-UHFFFAOYSA-N	71284	78951	C1OCC2(CO1)COCOC2	C7H12O4	160.17	0.18	-0.288929	0.18	-0.288929	0
Tramadol	27203-92-5	TVYLLZQTGLZFBW-ZBFHGGJFSA-N	31105	33741	COc1cccc(c1)[C@@]1(O)CCCC[C@@H]1CN(C)C	C16H25NO2	263.38	2.54	2.44986	0.17	0.621555	0.99
Traseolide	68140-48-7	IMRYETFJNLKUHK-UHFFFAOYNA-N	82799	91696	CC(C)C1C(C)C(C)(C)c2cc(C)c(cc12)C(C)=O	C18H26O	258.41	5.56	4.94469	5.56	4.94469	0
Trenbolone	10161-33-8	MEHHPFQKXOUFFV-FOIPXRHGSA-N	23089406	44403745	C[C@]12C=CC3=C4CCC(=O)C=C4CCC3C1CC[C@@H]2O	C18H22O2	270.37	2.48	2.25422	2.48	2.25422	0
Tri-isobutylphosphate	126-71-6	HRKAMJBPFPHCSD-UHFFFAOYSA-N	29088	31355	CC(C)COP(=O)(OCC(C)C)OCC(C)C	C12H27O4P	266.32	3.7	3.84669	3.7	3.84669	0
Tri(butoxyethyl)phosphate	78-51-3	WTLBZVNBAKMVDP-UHFFFAOYSA-N	6292	6540	CCCCOCCOP(=O)(OCCOCCCC)OCCOCCCC	C18H39O7P	398.48	3.46	3.94455	3.46	3.94455	0
Triadimenol	55219-65-3	BAZVSMNPJJMILC-UHFFFAOYSA-N	37749	41368	CC(C)(C)C(O)C(OC1=CC=C(Cl)C=C1)N1C=NC=N1	C14H18ClN3O2	295.77	3.05	3.28053	3.05	3.28053	0
Triallate	2303-17-5	MWBPRDONLNQCFV-UHFFFAOYSA-N	5342	5543	CC(C)N(C(C)C)C(=O)SCC(Cl)=C(Cl)Cl	C10H16Cl3NOS	304.66	4.93	3.80041	4.93	3.80041	0
Triamcinolone	124-94-7	GFNANZIMVAIWHM-USUPIGHBSA-N	29046	31307	C[C@]12C[C@H](O)[C@@]3(F)[C@@H](CCC4=CC(=O)C=C[C@]34C)[C@@H]1C[C@@H](O)[C@]2(O)C(=O)CO	C21H27FO6	394.44	0.92	0.241693	0.92	0.241674	0
Triclocarban	101-20-2	ICUTUKXCWQYESQ-UHFFFAOYSA-N	7266	7547	Clc1ccc(NC(=O)Nc2ccc(Cl)c(Cl)c2)cc1	C13H9Cl3N2O	315.59	5.23	4.93079	5.23	4.93075	0
Triclosan	3380-34-5	XEFQLINVKFYRCS-UHFFFAOYSA-N	5363	5564	Oc1cc(Cl)ccc1Oc1ccc(Cl)cc1Cl	C12H7Cl3O2	289.55	5.27	4.9821	5.21	4.80079	-0.34
Triclosan-methyl	4640-01-01	NLYDHBBTVWMLFD-UHFFFAOYSA-N	545009	627458	COc1cc(Cl)ccc1Oc1ccc(Cl)cc1Cl	C13H9Cl3O2	303.57	5.52	5.128	5.52	5.128	0
Tricresylphosphate	1330-78-5	BOSMZFBHAYFUBJ-UHFFFAOYSA-N	6281	6529	CC1=CC=C(OP(=O)(OC2=CC=C(C)C=C2)OC2=CC=C(C)C=C2)C=C1	C21H21O4P	368.37	5	6.62792	5	6.62792	0
Triethylcitrate	77-93-0	DOOTYTYQINUNNV-UHFFFAOYSA-N	88924	98469	CCOC(=O)CC(O)(CC(=O)OCC)C(=O)OCC	C12H20O7	276.29	1.09	0.185419	1.09	0.185402	0
Triethylene Glycol Monobutyl Ether	143-22-6	COBPKKZHLDDMTB-UHFFFAOYSA-N	8581	8923	CCCCOCCOCCOCCO	C10H22O4	206.28	0.35	0.664395	0.35	0.664395	0
Triethylphosphate	78-40-0	DQWPFSLDHJDLRL-UHFFFAOYSA-N	6287	6535	CCOP(=O)(OCC)OCC	C6H15O4P	182.16	1.02	1.1842	1.02	1.1842	0
Trifloxystrobin	141517-21-7	ONCZDRURRATYFI-TVJDWZFNSA-N	9839700	9578570	CO\N=C(\C(=O)OC)c1ccccc1CO\N=C(/C)c1cccc(c1)C(F)(F)F	C20H19F3N2O4	408.38	4.85	4.80456	4.85	4.80456	0
Trifloxystrobin CGA 321113	252913-85-2	ISZQNKFXNXQTTF-NACSPRHISA-N	19122067	22899348	CO\N=C(\C(O)=O)C1=CC=CC=C1CO\N=C(/C)C1=CC=CC(=C1)C(F)(F)F	C19H17F3N2O4	394.35	4.25	4.13465	0.64	0.97883	-1
Triglyme	112-49-2	YFNKIDBQEZZDLK-UHFFFAOYSA-N	13835222	13835222	COCCOCCOCCOC	C8H18O4	178.23	-0.38	-0.0163771	-0.38	-0.0163771	0
Trimethoprim	738-70-5	IEDVJHCEMCRBQM-UHFFFAOYSA-N	19853, 5376	5578, 21109	COc1cc(Cc2cnc(N)nc2N)cc(OC)c1OC	C14H18N4O3	290.32	1.12	1.28391	0.86	1.0961	0.36
Trimethyloctylammonium	15461-38-8	HTKPDYSCAPSXIR-UHFFFAOYSA-N	23324	24950	CCCCCCCC[N+](C)(C)C	C11H26N	173.34	-0.73	-0.869993	-0.73	-0.869993	0
Triphenylphosphate	115-86-6	XZZNDPSIHUTMOC-UHFFFAOYSA-N	7988	8289	O=P(Oc1ccccc1)(Oc1ccccc1)Oc1ccccc1	C18H15O4P	326.29	4.12	5.08765	4.12	5.08765	0
Triphenylphosphine oxide	791-28-6	FIQMHBFVRAXMOP-UHFFFAOYSA-N	12549	13097	O=P(c1ccccc1)(c1ccccc1)c1ccccc1	C18H15OP	278.29	3.67	4.7552	3.67	4.7552	0
Tris(1-chloro-2-propyl)phosphate	13674-84-5	KVMPUXDNESXNOH-UHFFFAOYNA-N	24387	26176	CC(CCl)OP(=O)(OC(C)CCl)OC(C)CCl	C9H18Cl3O4P	327.57	2.31	3.35697	2.31	3.35697	0
Tris(2-chloroethyl)phosphate	115-96-8	HQUQLFOMPYWACS-UHFFFAOYSA-N	7994	8295	ClCCOP(=O)(OCCCl)OCCCl	C6H12Cl3O4P	285.49	1.42	2.10725	1.42	2.10725	0
UV-234	50-84-0	OLFNXLXEGXRUOI-UHFFFAOYSA-N	100754	112412	CC(C)(c1ccccc1)c1cc(c(O)c(c1)C(C)(C)c1ccccc1)-n1nc2ccccc2n1	C30H29N3O	447.58	7.75	8.4078	7.75	8.4062	0
UV-320	3846-71-7	LHPPDQUVECZQSW-UHFFFAOYSA-N	69864	77455	CC(C)(C)c1cc(c(O)c(c1)C(C)(C)C)-n1nc2ccccc2n1	C20H25N3O	323.44	6	5.9734	6	5.97271	0
UV-326	3896-11-05	OCWYEMOEOGEQAN-UHFFFAOYSA-N	56304	62531	Cc1cc(c(O)c(c1)C(C)(C)C)-n1nc2ccc(Cl)cc2n1	C17H18ClN3O	315.81	5.38	5.3314	5.38	5.33087	0
UV-327	3864-99-1	UWSMKYBKUPAEJQ-UHFFFAOYSA-N	69879	77470	CC(C)(C)c1cc(c(O)c(c1)C(C)(C)C)-n1nc2ccc(Cl)cc2n1	C20H24ClN3O	357.89	6.55	6.4914	6.55	6.49072	0
Valsartan	137862-53-4	ACWBQPMHZXGDFX-UHFFFAOYNA-N	5448	5650	CCCCC(=O)N(CC1=CC=C(C=C1)C1=CC=CC=C1C1=NNN=N1)C(C(C)C)C(O)=O	C24H29N5O3	435.53	3.87	5.26938	-0.83	2.29184	-1.11
Vardenafil	224785-90-4	SECKRCOLJRRGGV-UHFFFAOYSA-N	99300	110634	CCCC1=NC(C)=C2N1NC(=NC2=O)C1=C(OCC)C=CC(=C1)S(=O)(=O)N1CCN(CC)CC1	C23H32N6O4S	488.61	2.12	1.32512	1.74	1.31323	-0.14
Velvione	37609-25-9	ABRIMXGLNHCLIP-UHFFFAOYSA-N	26547690	162268	O=C1CCCCCCCCCCC=CCCC1	C16H28O	236.4	5.17	5.57196	5.17	5.57196	0
Verapamil	52-53-9	SGTNSNPWRIOYBX-UHFFFAOYNA-N	2425	2520	COc1ccc(CCN(C)CCCC(C#N)(C(C)C)c2ccc(OC)c(OC)c2)cc1OC	C27H38N2O4	454.61	3.95	5.04319	2.01	2.7877	0.99
Vinclozoline	50471-44-8	FSCWZHGZWWDELK-UHFFFAOYNA-N	36278	39676	CC1(OC(=O)N(C1=O)C1=CC(Cl)=CC(Cl)=C1)C=C	C12H9Cl2NO3	286.12	3.27	3.74464	3.27	3.74464	0
Ziprasidone	146939-27-7	MVWVFYHBGMAFLY-UHFFFAOYSA-N	54841	60854	ClC1=C(CCN2CCN(CC2)C2=NSC3=CC=CC=C23)C=C2CC(=O)NC2=C1	C21H21ClN4OS	412.94	4.08	4.30405	2.9	4.13168	0.33

## Sheet: Table S4
Table S4: Measured concentration in ng/L in the water extract and water + mix extract, as well as the nominal spiked concentration in ng/L and the fraction of each chemical recovered by LVSPE (frecovery,i). frecovery,i is also provided for Schulze et al. (2017).
Note: nd: not detected; nm: not measureable as no calibration was obtained (no ionization or high background noise).
Compound name	Measured concentration in water extract (Cwater) (ng/L)	Measured concentration in process blank (ng/L)	Measured concentration in water + mix extract (Cwater+mix) (ng/L)	Nominal concentration spiked in water (Cmix, nominal) (ng/L)	frecovery,i (current study)	Mean frecovery,i
						(Schulze et al. 2017)
						HR-X	HR-XAW	HR-XCW
N,N-Bis(carboxymethyl)-L-glutamic acid	nm	nm	nm	80	nm
(3-Chloro-2-hydroxypropyl)trimethylammonium	0	0	0.9	80	0.012
(4-Sulfophenyl)acetic acid	0	0	0	80	nd
(Methoxymethyl)triphenylphosphonium	0	0	66	80	0.825
1-(3-carboxypropyl)-3,7-dimethylxanthine	0	0	0	80	nd
1,2,4-Triazole	0	0	0	80	nd
1,2-Benzisothiazolinone	0	0	75.7	80	0.947	0.982	nd	nd
1,3-Dimethyl-2-imidazolidinone	0	0	67.6	80	0.846
1,3-Diphenylguanidine	0	0	64.8	80	0.811
10,11-Dihydro-10,11-dihydroxycarbamazepine	0	0	65.4	80	0.818	1.279	nd	nd
10,11-Dihydro-10-hydroxycarbamazepine	0	0	77.5	80	0.968	1.388	nd	nd
11-Ketotestosterone	nm	nm	nm	2	nm
17α-Estradiol	0	0	1.5	2	0.75
17α -Ethinylestradiol	0	0	1.1	2	0.55
17α -Hydroxyprogesterone	nm	nm	nm	2	nm
17α -Methyltestosterone	0	0	2.1	2	1.036
17β-Estradiol	0	0	1.4	2	0.685
1-Butyl-3-methyl-imidazolium	0	0	53.3	80	0.666
1-Chloro-2-nitrobenzene	nm	nm	nm	80	nm
1-Ethyl-3-methyl-imidazolium	0	0	10.4	80	0.13
1H-Benzotriazole	0	0	61.3	80	0.766	0.582	0.003	nd
1-Methylimidazole	0	0	21.5	80	0.268
1-Naphthol	2.8	0	43.5	80	0.50855
2-(2-(Chlorophenyl)amino)benzaldehyde	0	0	16.4	80	0.204
2(4-morpholinyl)benzothiazole	0	0	53	80	0.663
2-(Methylthio)benzothiazole	0	0	73.8	80	0.922	0.624	0.005	nd
2,2,6,6-Tetramethyl-4 piperidone	11.7	18	146.7	80	1.68765
2,2-Dimethoxy-2-phenylacetophenone	nm	nm	nm	80	nm
2,3-Epoxypropyltrimethylammonium	0	0	0	80	nd
2,4-Diaminobenzenesulfonic acid	0	0	0	80	nf
2,4-Dichlorobenzoic acid	19.8	16	88.1	80	0.853425
2,4-Dichlorophenol	0	0	93.3	80	1.166
2,4-Dichlorophenoxyacetic acid	0	0	58.4	80	0.73	0.723	0.005	nd
2,4-Dinitrophenol	0	0	64.5	80	0.806	0.671	0.068	0.002
2,6-Dichlorobenzamide	0	0	57.5	80	0.718	1.242	nd	nd
2,6-Di-tert-butyl-1,4-benzoquinone	nm	nm	nm	80	nm
2,6-di-tert-Butylphenol	nm	nm	nm	80	nm
2,6-Xylidine	0	0	56	80	0.701
2,7-Naphthalenedisulfonic acid	0	0	0	80	nd
2-Acetonaphthone	nm	nm	nm	80	nm
2-Aminobenzimidazole	0	0	48.1	80	0.601	0.982	nd	nd
2-Benzothiazolesulfonic acid	2.3	22	42.8	80	0.505866	0.269	0.026	nd
2-Ethoxyethyl acetate	nm	nm	nm	80	nm
2-Hydroxyatrazine	0	0	57.3	80	0.716
2-Hydroxybenzothiazole	4.7	5	86	80	1.01605
2-Hydroxycarbamazepine	0	0	67.3	80	0.842	1.694	nd	nd
2-Hydroxyquinoline	0	0	51.7	80	0.647
2-Isopropyl-6-methyl-pyrimidin-4-ol	1.9	2	58.5	80	0.707346
2-Isopropylthioxanthone	0	0	3.2	80	0.04
2-Mercaptobenzothiazole	nm	nm	nm	80	nm
2-Methylbenzothiazole	0	0	69	80	0.863	0.806	nd	nd
2-Morpholinothiobenzothiazole	0	0	51.2	80	0.64
2-Naphthalene sulfonic acid	0	0	68.6	80	0.857	0.716	nd	nd
2-Octyl-4-isothiazolin-3-one	0	0	68	80	0.85	1.074	nd	nd
2-Phenylphenol	0	0	46.2	80	0.578
2-Thiouracil	0	0	0	80	nd
3,4,5-trichlorophenol	0	0	61.1	80	0.764
3,4-Dichlorophenylurea	0	0	62.8	80	0.784	0.829	nd	nd
3,5,6-Trichloro-2-pyridinol	0	0	65.7	80	0.821	0.861	nd	nd
3,5-Dimethyl-1-hexyn-3-ol	nm	nm	nm	80	nm
3-Iodopropynyl butylcarbamate	0	0	54	80	0.676	1.491	nd	nd
4-(Dimethylamino)pyridine	0	0	70.4	80	0.88
4'-Aminoacetanilide	0	0	17.8	80	0.222	0.09	0.02	0.006
4-Aminoantipyrine	0	0	49.4	80	0.617	0.337	nd	nd
4-Aminobenzamide	0	0	30.4	80	0.38	0.285	nd	nd
4-Amino-N,N-dimethylbenzenesulfonamide	0	0	64.9	80	0.811	1.099	nd	nd
4-Androsten-11B-ol-3,17-dione	nm	nm	nm	2	nm
4-Androstene-3,17-dione	0	0	1.4	2	0.692	1.099	nd	nd
4-Bromophenol	nm	nm	nm	80	nm	0.839	nd	nd
4-Chlorophenol	0	0	64.7	80	0.808
4-Cumylphenol	0	0	49.7	80	0.622
4-Fluorobenzoylpropionic acid	0	0	65.5	80	0.819
4-Formyl-antipyrine	0	0	70	80	0.874	1.337	nd	nd
4-Hydroxybenzotriazole	0	0	28.2	80	0.352	0.686	nd	nd
4-Hydroxyquinoline	0	0	99.1	80	1.239
4-Hydroxytamoxifen	0	0	3.6	80	0.045
4-Isopropylaniline	0	0	29.4	80	0.367
4-Methylanisole	nm	nm	nm	80	nm
4-Methylbenzylidene camphor	0	0	44.8	80	0.56
4-Methylmorpholine-N-oxide	0	0	0	80	nd
4-Nitrophenol	0	0	94.9	80	1.186	0.984	0.008	0.007
4-n-Nonylphenol	0	0	1.2	80	0.015
4-n-Octylphenol	11.1	11	11	80	nd
5-Carboline	0	0	61.7	80	0.771
5-Fluorouracil	0	0	0	80	nd
5-Methyl-1H-benzotriazole	2.1	1	67.5	80	0.817958	0.968	0.006	0.001
6:2 fluorotelomer sulfonic acid	47.6	50	99.3	80	0.6456
6-Mercaptopurine	0	0	0	80	nd
6-Propyl-2-thiouracil	0	0	0	80	nd
7-(Ethylamino)-4-methylcoumarin	0	0	68.7	80	0.859
7-Amino-4-methylcoumarin	0	0	75.8	80	0.947
7-Diethylamino-4-methylcoumarin	0	0	67.3	80	0.841
7-Hydroxymethotrexat	0	0	43.6	80	0.545
Abamectin	0	0	39.6	80	0.494
Acesulfame	0	0	4.6	80	0.058
Acetaminophen	0	0	19.3	80	0.242	0.433	nd	nd
Acetamiprid	0	0	75.7	80	0.946	1.072	nd	nd
Acetochlor	0	0	72.1	80	0.901
Acetyl-sulfamethoxazole	0	0	76.8	80	0.96	0.855	nd	nd
Acrylamide	0	0	0	80	nd
Acyclovir	0	0	3.7	80	0.046
Albendazole	0	0	48.6	80	0.608	0.776	nd	nd
Allethrin	0	0	41.3	80	0.516
Amantadine	0	0	62.6	80	0.783
Ambrettolide	0	0	54.5	80	0.682
Ambroxol	0	0	21.7	80	0.271
Amcinonide	0	0	1.8	2	0.919
Ametryn	0	0	66.8	80	0.835	1.217	nd	nd
Amidosulfobetaine-14	0	0	79.7	80	0.997
Amidosulfuron	0	0	89.8	80	1.123
Amiodarone	0	0	9.6	80	0.119
Amitraz	0	0	0	80	nd
Amitriptyline	0	0	60.4	80	0.754699
Amitrole	0	0	0	80	nd
Amoxicillin	nm	nm	nm	80	nm
Anastrozole	0	0	68.2	80	0.852
Androsterone	nm	nm	nm	2	nm	0.938	nd	nd
Aniline	5	5	46.7	80	0.521654
Anthranilic acid	nm	nm	nm	80	nm
Atenolol	0	0	65.8	80	0.822	1.253	nd	nd
Atorvastatin	0	0	13.5	80	0.169
Atrazine	0	0	70	80	0.874886	0.978	nd	nd
Azelastine	0	0	47.5	80	0.594
Azinphos methyl	0	0	73.1	80	0.914	1.015	nd	nd
Azithromycin	0	0	57.6	80	0.72
Azoxystrobin	0	0	67.9	80	0.849	0.987	nd	nd
Benalaxyl	0	0	65.4	80	0.818	0.966	nd	nd
Bendiocarb	0	0	62.1	80	0.776	2.214	nd	nd
Bentazone	0	0	64	80	0.8	0.908	0.064	nd
Benzenesulfonic acid	nm	nm	nm	80	nm	0.006	1.232	nd
Benzethonium	0	0	3	80	0.038	0.007	0.003	0.001
Benzocain	0	0	67.1	80	0.839
Benzophenone-3	0	0	67.4	80	0.842
Benzophenone-4	0	0	66.4	80	0.83	0.538	nd	nd
Benzothiazole	0	0	75.3	80	0.941	0.202	0.024	0.151
Benzyl benzoate	nm	nm	nm	80	nm
Benzyl-2-naphthylether	nm	nm	nm	80	nm
Benzyldimethyldodecylammonium	35.4	36	26	80	nd	0.016	0.015	0.01
Benzyldimethylhexadecylammonium	7.5	7	30.5	80	0.286876	0.037	0.072	0.023
Bethamethasone	0	0	1.3	2	0.641	1.043	nd	nd
Bezafibrate	0	0	74.5	80	0.931	0.769	nd	nd
Bicalutamide	0	0	58.8	80	0.734726
Bifenox free acid	0	0	88.3	80	1.103
Bifonazol	0	0	7.5	80	0.094
Bis(2-ethylhexyl)phosphate	0	0	68.4	80	0.855
Bis(4-chlorophenyl)sulfone	nm	nm	nm	80	nm
Bisoprolol	0	0	48.5	80	0.607
Bisphenol A	3.9	6	56.9	80	0.66225
Bisphenol B	nm	nm	nm	80	nm
Bisphenol BP	nm	nm	nm	80	nm
Bisphenol C	nm	nm	nm	80	nm
Bisphenol E	nm	nm	nm	80	nm
Bisphenol F	0	0	66.8	80	0.835
Bisphenol S	0	0	50.4	80	0.63	0.904	nd	0.002
Bisphenol Z	nm	nm	nm	80	nm
Boscalid	0	0	74.4	80	0.93	1.159	nd	nd
Bosentan	0	0	64.9	80	0.812
Bromochlorophen	0	0	5.5	80	0.069
Bromoxynil	0	0	63.3	80	0.792	0.755	0.004	nd
Budesonide	0	0	1.9	2	0.972
Bupirimate	0	0	53.7	80	0.671
Bupropion	0	0	158.1	80	1.976
Butylparaben	1.6	2	59.7	80	0.72575	0.819	0.019	nd
Caffeine	0	0	58.5	80	0.731	1.284	nd	nd
Candesartan	0	0	32.7	80	0.409
Canrenone	0	0	6.2	2	3.083	0.905	nd	nd
Captopril	0	0	nm	80	nm
Carbamazepine	0	0	68.4	80	0.854567	1.099	nd	nd
Carbaryl	0	0	71.9	80	0.899	1.288	nd	nd
Carbendazim	0	0	64.8	80	0.81	1.445	nd	nd
Carboline	0	0	67.5	80	0.843
Cashmeran	0	0	53.9	80	0.674
Celecoxib	0	0	27	80	0.337
Celestolide	nm	nm	nm	80	nm
Cetirizine	0	0	61.7	80	0.771	0.885	nd	nd
Chlorfenvinphos	0	0	74.7	80	0.934	0.966	nd	nd
Chloridazon	0	0	74	80	0.924977	1.036	nd	nd
Chlormequat	0	0	1	80	0.013	0.252	0.003	0.089
Chlorophene	0	0	11.2	80	0.14	0.105	nd	nd
Chlorothalonil-4-hydroxy	0	0	54.8	80	0.684571
Chlorotoluron	0	0	72.2	80	0.903	1.053	nd	nd
Chloroxuron	0	0	68.4	80	0.854932	0.86	nd	nd
Chlorpropham	0	0	54.7	80	0.684	1.751	nd	nd
Ciclopirox	0	0	80.8	80	1.01
Ciprofloxacin	nm	nm	nm	80	nm
Citalopram	0	0	63.7	80	0.796	0.807	nd	nd
Clarithromycin	0	0	54	80	0.675	1.122	0.024	0.029
Climbazole	0	0	76.4	80	0.95458
Clobetasol	nm	nm	nm	2	nm
Clofibrate	nm	nm	nm	80	nm
Clofibric acid	0	0	68.7	80	0.858	0.838	0.011	nd
Clomazone	0	0	69.9	80	0.874	1.103	nd	nd
Clonidine	0	0	78	80	0.975	2.032	nd	nd
Clopidogrel	0	0	33.1	80	0.414	0.63	nd	nd
Clopyralid	nm	nm	nm	80	nm
Clothianidin	0	0	72.2	80	0.902
Clotrimazole	0	0	31.9	80	0.399	0.318	nd	nd
Clozapine	0	0	63.7	80	0.796	0.792	nd	nd
Cortisone	nm	nm	nm	2	nm	0.961	nd	nd
Cotinine	0	0	63.7	80	0.796	2.201	nd	nd
Creatinine	0	0	0	80	nd
Crotamiton	0	0	65.6	80	0.82	1.1	nd	nd
Cyclamate	0	0	12.3	80	0.153	1.571	0.556	nd
Cyclohexylamine	17	15	37.9	80	0.2606
Cyclophosphamide	0	0	68.8	80	0.86
Cyproconazole	0	0	74.9	80	0.937
Cyprodinil	0	0	60.7	80	0.758
Cyproterone	nm	nm	nm	2	nm	0.961	nd	nd
Cyromazine	0	0	27.9	80	0.349
Daidzein	0	0	76.6	80	0.957	0.735	nd	nd
DCOIT	0	0	24	80	0.301
Decyl sulfate	2.5	5	94.7	80	1.15168
DEET	0	0	69.9	80	0.874	1.077	nd	0.001
Denatonium	0	0	64.8	80	0.81	0.572	nd	nd
Desethylatrazine	0	0	65.8	80	0.823	0.972	nd	nd
Desethylterbutylazine	0	0	73.3	80	0.916	1.124	nd	nd
Desisopropylatrazine	0	0	67.2	80	0.84	0.99	0.001	nd
Desloratadine	0	0	49.6	80	0.62
Desonide	0	0	1.7	2	0.854
Desoximetasone	nm	nm	nm	2	nm
Desphenyl chloridazon	0	0	3.7	80	0.046	nd	0.586	nd
Dexamethasone	0	0	2.1	2	1.042	0.948	nd	nd
Diatrizoate	nm	nm	nm	80	nm
Diazepam	0	0	66	80	0.825	1.048	nd	nd
Diazinon	0	0	67	80	0.838	0.854	nd	nd
Dibenzyl ether	nm	nm	nm	80	nm
Dibutylhydroxytoluene	nm	nm	nm	80	nm
Dichlorophen	0	0	0.9	80	0.011
Dichlorprop	0	0	78.4	80	0.98
Dichlorvos	nm	nm	nm	80	nm	0.65	nd	nd
Diclofenac	0	0	57	80	0.712	1.077	nd	nd
Didecyldimethylammonium	0	0	57.8	80	0.723	0.044	0.053	0.038
Diethylene glycol monobutyl ether	15	15	78.3	80	0.790833
Difenoconazole	0	0	61.2	80	0.764765
Diflubenzuron	0	0	73.2	80	0.91497
Diflufenican	0	0	4.5	80	0.056	0.018	nd	nd
Diglyme	nm	nm	nm	80	nm
Dihydrotestosterone	nm	nm	nm	2	nm	1.193	nd	nd
Dimethachlor	0	0	67	80	0.838
Dimethachlor ESA	0	0	47.8	80	0.598
Dimethachlor OA	0	0	72.1	80	0.902
Dimethenamid	0	0	51.7	80	0.646
Dimethoate	0	0	65.8	80	0.822	1.07	nd	nd
Dimethylaminophenazone	0	0	52.3	80	0.653
Dimethyldioctadecylammonium	nm	nm	nm	80	nm	1.213	nd	nd
Dimoxystrobin	0	0	76.4	80	0.955
Dinoseb	0	0	61.3	80	0.766
Dioctylsulfosuccinate	nm	nm	nm	80	nm
Diphenhydramine	0	0	78.8	80	0.985	1.027	nd	nd
Diphenylether	nm	nm	nm	80	nm
Diphenylphosphate	0	0	52.9	80	0.661	0.856	0.006	nd
Diphenylphosphine oxide	0	0	5.6	80	0.069
Diuron	0	0	69.1	80	0.864	0.847	nd	nd
DMAPMA	nm	nm	nm	80	nm
Dodecyl sulfate	nm	nm	nm	80	nm
Dodecylbenzenesulfonic acid	nm	nm	nm	80	nm
Dodemorph	0	0	59.5	80	0.743
Domperidone	0	0	48	80	0.601
Drospirenone	0	0	1.8	2	0.907	1.021	nd	nd
Duloxetine	0	0	22.3	80	0.279
Dydrogesterone	0	0	1.6	2	0.796
Ebastin	0	0	8.7	80	0.108
EDDP	0	0	63.1	80	0.789
Efavirenz	0	0	36.1	80	0.451
Enalapril	0	0	34.1	80	0.427
Enrofloxacin	0	0	29.6	80	0.37	0.012	0.009	nd
Epiandrosterone	nm	nm	nm	2	nm
Epoxiconazole	0	0	68.2	80	0.853
Erythromycin	0	0	18.5	80	0.231	0.909	nd	nd
Estriol	1.3	0	2.3	2	0.5
Estrone	0	0	1.4	2	0.69
Ethion	0	0	0.6	80	0.008	nd	nd	nd
Ethofumesate	0	0	51.9	80	0.648
Ethyl azinphos	0	0	64.6	80	0.808	1.062	nd	nd
Ethyl-4-dimethylaminobenzoate	1.5	0	50.1	80	0.60807
Ethylene glycol diphenylether	nm	nm	nm	80	nm
Ethylenethiourea	0	0	0	80	nd
Ethylparaben	4.5	5	80.2	80	0.945889	0.987	nd	nd
Etofenprox	nm	nm	nm	80	nm
Exemestane	0	0	1.8	2	0.919	1.078	nd	nd
Fenofibrate	0	0	6	80	0.0748835
Fenoxycarb	0	0	45.6	80	0.57
Fenpropidin	0	0	79.1	80	0.988
Fenpropimorph	0	0	58.9	80	0.737	1.041	nd	nd
Fenthion	0	0	76.5	80	0.956
Fenuron	0	0	67.4	80	0.842	0.943	nd	nd
Finasteride	0	0	68.4	80	0.854749	0.956	nd	nd
Fipronil	0	0	40.2	80	0.503	0.506	nd	nd
Fipronil desulfinyl	0	0	13.8	80	0.172
Fipronil sulfide	0	0	1.5	80	0.019
Fipronil sulfone	0	0	0.7	80	0.009
Fluconazole	0	0	54.4	80	0.68
Flufenacet	0	0	78.1	80	0.977
Flufenoxuron	0	0	0	80	nd
Flumequine	0	0	50.9	80	0.636	0.072	0.031	nd
Flumioxazin	0	0	81.5	80	1.019
Flunisolide	0	0	4.1	2	2.057
Fluorescent brightener 351	nm	nm	nm	80	nm
Fluorescent brightener 71	nm	nm	nm	80	nm
Fluorometholone	nm	nm	nm	2	nm
Fluoxastrobin	0	0	61	80	0.762
Flurtamone	0	0	66.2	80	0.828	0.875	nd	nd
Flusilazole	0	0	68.9	80	0.861	0.721	nd	nd
Flutamide	0	0	68.7	80	0.859	0.795	nd	nd
Fluticasone propionate	0	0	0.3	2	0.168
Fluvoxamine	0	0	28.3	80	0.354
Furosemide	0	0	61.6	80	0.77	1.089	nd	nd
Gabapentin	0	0	17.2	80	0.215	0.131	nd	0.256
Gabapentin-Lactam	0	0	56.6	80	0.707
Galaxolide	nm	nm	nm	80	nm
Gemfibrozil	0	0	173.1	80	2.164	0.964	nd	nd
Genistein	0	0	63.8	80	0.797	0.529	0.003	nd
Gestoden	nm	nm	1.7	2	0.851	1.054	nd	nd
Glibenclamide	0	0	83.1	80	1.039
Glimepiride	0	0	80.7	80	1.009
Guanylurea	0	0	0	80	nd
Habanolide	nm	nm	nm	80	nm
Harman	0	0	72.8	80	0.91
Harmine	0	0	82.2	80	1.028
Hexa(methoxymethyl)melamine	0	0	67.7	80	0.847	1.39	0.006	nd
Hexadecylpyridinium	0	0	20.9	80	0.261	0.015	0.037	0.013
Hexadecyltrimethylammonium	0	0	64.4	80	0.804	0.019	0.014	0.009
Hexazinone	0	0	61.4	80	0.767
Homosalate	nm	nm	nm	80	nm
Hydrochlorothiazide	0	0	63.4	80	0.793
Hydrocortisonacetate	0	0	2.6	2	1.294
Hydrocortisone	nm	nm	nm	2	nm	1.138	0.005	0.01
Hydroxycarbamide	0	0	0	80	nd
Hydroxychloroquine	0	0	17.6	80	0.22
Ibuprofen	0	0	67.5	80	0.844
Icaridin	2.9	3	57	80	0.676655	1.112	nd	nd
Ifosfamide	0	0	69.2	80	0.865
Imatinib	0	0	34.7	80	0.434
Imazalil	0	0	88.2	80	1.102	0.979	nd	nd
Imidacloprid	0	0	73.1	80	0.914
Imidacloprid-guanidine	0	0	51.9	80	0.649
Imidacloprid-urea	0	0	74	80	0.925
Iminostilbene	0	0	56.1	80	0.701
Indole-3-carboxyaldehyde	0	0	52.9	80	0.661
Indometacin	0	0	58.5	80	0.731	1.242	0.001	0.001
Indoxacarb	0	0	0	80	nd
Iohexol	nm	nm	nm	80	nm
Iopamidol	0	0	0	80	nd
Iprodione	nm	nm	nm	80	nm
Irgarol	0	0	61.5	80	0.769	0.898	nd	nd
ISO E Super	0	0	51.3	80	0.641
Isophorone diamine	0	0	0	80	nd
Isoproturon	0	0	77	80	0.963	1.089	nd	nd
Isoxaben	0	0	60.7	80	0.759
Ketamine	0	0	76	80	0.951
Ketoconazole	0	0	15.6	80	0.195	0.954	nd	nd
Ketoprofen	0	0	68.2	80	0.852	0.971	nd	nd
Labetalol	0	0	94.1	80	1.176
Lamotrigine	0	0	92.4	80	1.154
Lauramidopropylbetaine	70.9	40	50	80	nd
Lauric isopropanolamide	0	0	56.4	80	0.704691	0.988	nd	nd
Lauryl diethanolamide	10.5	12	71.2	80	0.758835	1.041	nd	nd
Lenacil	0	0	83	80	1.038	1.101	nd	nd
Lidocaine	0	0	44.9	80	0.561	1.223	nd	nd
Lincomycin	0	0	50.7	80	0.634	1.17	nd	nd
Linuron	0	0	71.2	80	0.89	1.088	nd	nd
Loperamide	0	0	62.4	80	0.78
Lorazepam	0	0	68.1	80	0.851	1.063	nd	nd
Losartan	0	0	61.7	80	0.771
L-thyroxine	0	0	25.5	80	0.318
MCPA	0	0	63.8	80	0.797	0.902	0.01	nd
Mebendazole	0	0	67.2	80	0.84	0.929	nd	nd
Mebeverine	0	0	68.3	80	0.854
Mecoprop	0	0	53.7	80	0.671	0.864	0.005	nd
Medroxyprogesterone	0	0	1.8	2	0.9045	0.979	nd	nd
Medroxyprogesteroneacetate	0	0	1.8	2	0.877
Mefenamic acid	0	0	62.3	80	0.778	0.931	0.002	nd
Megestrol-17-acetate	0	0	1.6	2	0.812
Melamine	nm	nm	nm	80	nm
Melperon	0	0	60.1	80	0.751
Memantine	0	0	65.5	80	0.819
Mepiquat	0	0	1.8	80	0.023	0.008	nd	0.066
Mesalazine	0	0	nm	80	nm
Mestranol	nm	nm	nm	2	nm
Metalaxyl	0	0	71.8	80	0.898
Metamitron	0	0	47.6	80	0.594678	0.917	nd	nd
Metazachlor	0	0	71.1	80	0.889	1.062	nd	nd
Metazachlor ESA	0	0	78.9	80	0.987
Metconazole	0	0	60.6	80	0.758
Metformin	0	0	3	80	0.038	0.058	0.002	0.275
Methacrylamide	0	0	0	80	nd
Methimazol	0	0	2	80	0.025
Methiocarb	0	0	41	80	0.513	1.261	nd	nd
Methomyl	0	0	68.2	80	0.853
Methotrexate	0	0	55.4	80	0.692
Methylchloroisothiazolinone	nm	nm	nm	80	nm
Methylparaben	9.3	4	68.5	80	0.73978
Methyltriphenylphosphonium	0	0	66.1	80	0.826
Metolachlor	0	0	81.2	80	1.015	1.102	nd	nd
Metolachlor ESA	0	0	70.5	80	0.881	0.769	nd	nd
Metolachlor OA	0	0	50.2	80	0.627
Metolachlor-NOA 413173	0	0	74.2	80	0.928
Metoprolol	0	0	68.6	80	0.858	1.157	nd	nd
Metoprolol acid	0	0	10.2	80	0.127
Metribuzin	0	0	77.3	80	0.967
Miconazole	0	0	4.9	80	0.062
Mirtazapine	0	0	57.7	80	0.721
Monensin	0	0	75.7	80	0.946	0.448	nd	nd
Montelukast	0	0	40.3	80	0.504
Musk ambrette	nm	nm	nm	80	nm
Musk-xylene	nm	nm	nm	80	nm
m-Xylene-4-sulfonic acid	0	0	85.5	80	1.069
Myclobutanil	0	0	79.7	80	0.996
Mycophenolic acid	0	0	54.9	80	0.686
N,N-Dimethyldodecylamine N-oxide	23.8	14	54.8	80	0.387362	0.756	nd	nd
N,N-Dimethylsulfamide	0	0	52.8	80	0.66
N-Acetyl mesalazine	0	0	4.1	80	0.051
N-Acetyl-4-aminoantipyrine	0	0	66	80	0.825	1.295	nd	nd
Naproxen	0	0	97	80	1.213	1.238	0.005	0.001
N-Butylbenzenesulfonamide	11.7	14	62.2	80	0.631289
N-cyclohexyl-2-benzothiazole-amine	0	0	55.3	80	0.691
N-cyclohexyl-2-benzothiazole-sulfenamide	0	0	61.3	80	0.767
N-Ethyl-o-toluenesulfonamide	1	2	77	80	0.962
N-Formyl-4-aminoantipyrine	0	0	67.6	80	0.844773	1.413	nd	nd
Nicosulfuron	0	0	54.6	80	0.682
Nitrendipin	0	0	44.4	80	0.554
Nitrofurantoin	0	0	52.2	80	0.652
N-Methyl-2-pyrrolidone	0	0	14.5	80	0.182
N-Nitrosodimethylamine	0	0	0	80	nd
N-Nitrosomorpholine	0	0	0	80	nd	0.709	0.07	0.128
Norethindrone	0	0	1.5	2	0.77472	1.194	nd	nd
Norfloxacin	0	0	nm	80	nm
Norgestimate	0	0	1.2	2	0.594	0.141	nd	nd
Norgestrel	0	0	1.3	2	0.643	1.005	nd	nd
Norharmane	0	0	69.4	80	0.868
Octocrylene	0	0	13.6	80	0.171
Octyl-methoxycinnamate	nm	nm	nm	80	nm
Ofloxacin	0	0	71.4	80	0.893	0.005	0.019	nd
Ondansetron	0	0	52.3	80	0.654
Orlistat	0	0	12.8	80	0.16
Oryzalin	0	0	33.4	80	0.418
o-Toluidine	7.5	9	57.9	80	0.6296
Oxadiazone	0	0	65.1	80	0.813
Oxazepam	0	0	61.4	80	0.767	0.986	nd	nd
Oxybutynin	0	0	59.8	80	0.748
Oxypurinol	0	0	0	80	nd
Paramethasone	0	0	0	2	nd
Parathion-methyl	nm	nm	nm	80	nm
Paroxetine	0	0	17.6	80	0.22	0.537	nd	nd
p-Chlorocresol	0	0	64.7	80	0.809	0.732	nd	nd
Pendimethalin	0	0	4	80	0.05	nd	nd	nd
Pentoxifylline	0	0	77.8	80	0.973	1.449	nd	nd
Perfluorobutanoic acid	3.1	7	16.7	80	0.1696	0.04	0.554	nd
Perfluorodecanoic acid	nm	nm	nm	80	nm	0.548	nd	nd
Perfluoroheptanoic acid	2.9	3	13.2	80	0.127925	1.145	0.002	0.009
Perfluorohexanoic acid	0	0	45.5	80	0.569	0.812	0.012	0.009
Perfluorooctanesulfonamide	0	0	54.4	80	0.68
Perfluorooctanesulfonic acid	0	0	66.8	80	0.834737	0.614	nd	0.001
Perfluorooctanoic acid	0	0	41.3	80	0.517	0.98	0.018	0.028
Perfluorotetradecanoic acid	nm	nm	nm	80	nm
Pethoxamid	0	0	68.5	80	0.856	1.26	nd	nd
Phantolide	nm	nm	nm	80	nm
Phenazone	0	0	65.1	80	0.814	1.544	nd	nd
Phenylbenzimidazole sulfonic acid	0	0	68.5	80	0.856	0.84	nd	nd
Phthalamic acid	nm	nm	nm	80	nm
Phthalimide	nm	nm	nm	80	nm
Picloram	0	0	20.1	80	0.252
Picolinafen	0	0	0	80	nd
Picoxystrobin	0	0	37	80	0.463
Pindolol	0	0	36	80	0.45	0.199	nd	nd
Pioglitazone	0	0	48	80	0.601
Pipamperone	0	0	55.9	80	0.698
Piperonyl butoxide	0	0	62.3	80	0.779
Pirimicarb	0	0	68.2	80	0.852	1.017	nd	nd
Pirimiphos-methyl	0	0	52.3	80	0.654	0.537	nd	nd
Pravastatin	0	0	82.6	80	1.032	1.068	nd	nd
Prednisolone	nm	nm	nm	2	nm	0.835	nd	nd
Prednisone	0	0	2.6	2	1.297	1.223	nd	nd
Pregnanediol	nm	nm	nm	2	nm
Primidone	0	0	78.6	80	0.982	0.669	nd	nd
Prochloraz	0	0	71.2	80	0.89	0.806	nd	nd
Procymidone	0	0	50.4	80	0.63
Progesterone	0	0	1.5	2	0.765	0.916	0.005	0.002
Promethazin	0	0	69.5	80	0.869
Propachlor	0	0	76	80	0.95
Propamocarb	0	0	51.4	80	0.642	0.881	nd	nd
Propanil	0	0	68.7	80	0.858	1.148	nd	0.001
Propiconazole	0	0	78.9	80	0.986	0.848	nd	nd
Propoxycarbazone	0	0	65.5	80	0.819	0.336	nd	nd
Propranolol	0	0	60	80	0.75	1.161	nd	nd
Propylparaben	1.4	1	56.6	80	0.69	0.894	nd	0.011
Propyphenazone	0	0	67.5	80	0.843	1.417	nd	nd
Propyzamide	0	0	70	80	0.874639
Prosulfocarb	0	0	69	80	0.863	0.854	nd	nd
Prothioconazole-desthio	0	0	67.4	80	0.842	0.946	nd	nd
p-Toluenesulfonamide	0	0	71.6	80	0.894	1.17	nd	nd
Pyraclostrobin	0	0	18.9	80	0.236
Pyrazophos	0	0	67.5	80	0.844	1.036	nd	nd
Pyrithione	0	0	0	80	nd
Quinmerac	0	0	37.7	80	0.471
Quinoxyfen	0	0	6.6	80	0.082	0.013	nd	nd
Raloxifene	0	0	5.8	80	0.072	0.048	nd	nd
Ranitidine	0	0	22.1	80	0.277	0.645	nd	nd
Risperidone	0	0	61.5	80	0.769
Ropinirole	0	0	65.1	80	0.814
Roxithromycin	0	0	52.4	80	0.655	1.042	nd	nd
Saccharin	0	0	32.3	80	0.403
Scopolamine-N-butyl	0	0	73.3	80	0.916
Sertraline	0	0	40.5	80	0.506
Simazine	0	0	72.8	80	0.91	1.304	nd	nd
Simetryn	0	0	70.5	80	0.881	1.126	nd	nd
Sotalol	0	0	39.5	80	0.494
Spiroxamine	0	0	62.7	80	0.783	1.022	nd	nd
Sucralose	0	0	80.8	80	1.01
Sulcotrione	0	0	37.1	80	0.464
Sulfadimethoxine	0	0	61.1	80	0.764
Sulfamethazine	0	0	63.2	80	0.789	1.109	nd	nd
Sulfamethoxazole	0	0	55.7	80	0.696	1.28	nd	nd
Sulfapyridine	0	0	53.5	80	0.668	1.757	nd	nd
Sulfathiazole	0	0	57.3	80	0.717
Sulfolane	nm	nm	nm	80	nm
Tacrolimus	0	0	46.9	80	0.586
Tamoxifen	0	0	4.3	80	0.053	0.012	nd	nd
TDCPP	57.6	39	68.5	80	0.135975
Tebuconazole	0	0	68.1	80	0.851	0.868	nd	nd
Telmisartan	0	0	42.8	80	0.535
Temazepam	0	0	57.3	80	0.717
Terbinafine	0	0	4.4	80	0.055	0.137	nd	nd
Terbuthylazine	0	0	72.7	80	0.908	0.948	nd	nd
Terbuthylazine-2-hydroxy	0	0	76.9	80	0.961	0.936	nd	nd
Terbutryn	0	0	65.5	80	0.819
Testosterone	0	0	2	2	1.009	1.154	nd	nd
Tetrabromobisphenol A	nm	nm	nm	80	nm
Tetracain	0	0	45.5	80	0.569
Tetrachlorosalicylanilide	0	0	9.3	80	0.116	0.018	nd	0.001
Tetradecylsulfate	nm	nm	nm	80	nm
Tetraglyme	3.9	10	66.1	80	0.777583	0.902	nd	nd
Tetrahydrophthalimide	nm	nm	nm	80	nm
Tetrapropylammonium	0	0	46	80	0.576
Theophyllin	0	0	59.1	80	0.739
Thiabendazole	0	0	52.8	80	0.66	1.34	nd	nd
Thiacloprid	0	0	67.1	80	0.839	1.183	nd	nd
Thiacloprid amide	0	0	71.7	80	0.896
Thiamethoxam	0	0	60.5	80	0.757
Thiophanate-methyl	0	0	12.9	80	0.162
Thymol	nm	nm	nm	80	nm
TMDD	3.5	10	26.8	80	0.290313
Tonalide	0	0	44.7	80	0.559
Torasemide	0	0	88.2	80	1.102
TOSU	nm	nm	nm	80	nm
Tramadol	0	0	69.4	80	0.867	1.539	nd	nd
Traseolide	nm	nm	nm	80	nm
Trenbolone	0	0	2	2	1.013	0.89	nd	nd
Tri(butoxyethyl)phosphate	9.4	11	71.8	80	0.780664
Triadimenol	0	0	66.4	80	0.83
Triallate	0	0	35.4	80	0.443
Triamcinolone	0	0	3.2	2	1.595	1.208	nd	nd
Triclocarban	0	0	1.9	80	0.024	nd	nd	nd
Triclosan	0	0	5.1	80	0.064	nd	nd	0.006
Triclosan-methyl	nm	nm	nm	80	nm
Tricresylphosphate	8.7	3	41.7	80	0.411384
Triethylcitrate	17.9	16	103.9	80	1.07551	1.553	0.008	0.018
Triethylene Glycol Monobutyl Ether	23	28	79.7	80	0.708542
Triethylphosphate	0	3	73.1	80	0.914
Trifloxystrobin	0	0	19	80	0.238	0.201	nd	nd
Trifloxystrobin CGA 321113	0	0	85.8	80	1.072
Triglyme	5	5	66.9	80	0.773968
Tri-isobutylphosphate	17.3	18	74.4	80	0.71375	1.11	0.044	0.068
Trimethoprim	0	0	63.6	80	0.795	1.502	nd	nd
Trimethyloctylammonium	nm	nm	nm	80	nm	0.354	nd	nd
Triphenylphosphate	0	0	72.6	80	0.907	0.285	0.026	0.029
Triphenylphosphine oxide	21.5	23	86.8	80	0.816509
Tris(1-chloro-2-propyl)phosphate	49.1	41	51.2	80	0.0262294	0.753	nd	nd
Tris(2-chloroethyl)phosphate	4.2	3	68.2	80	0.852	1.734	0.006	0.013
UV-234	0	0	66.1	80	0.826
UV-320	nm	nm	nm	80	nm
UV-326	nm	nm	nm	80	nm
UV-327	nm	nm	nm	80	nm
Valsartan	0	0	64.9	80	0.812
Vardenafil	0	0	35.6	80	0.444752
Velvione	nm	nm	nm	80	nm
Verapamil	0	0	57	80	0.712	0.795	0.002	0.001
Vinclozoline	0	0	35.2	80	0.441
Ziprasidone	0	0	16.5	80	0.206

## Sheet: Table S5
Table S5: Results for background, recovery and calibration samples for calculation of frecovery,i for multi-layer SPE cartridges.
*indicates chemicals that were not spiked in LVSPE, but were used only for reverse recovery modelling
Chemical	Rhine Background		Rhine Spike after SPE (Calibration sample)					Rhine Spike before SPE (Recovery sample)					R2	frecovery,i
	Average Area Ratio	Standard deviation (%)	Ratio Measurement			Calculation		Ratio Measurement			Calculation
			200ng	400ng	600ng	Slope (Factor 1000)	R2	200ng	400ng	600ng	Slope (Factor 1000)	R2
1,2-Benzisothiazolinone	0		0.16	0.3	0.48	0.78	1	0.12	0.23	0.36	0.6	1	1	0.764
1,3-Dimethyl-2-imidazolidinone	0		3.57	7.01	11.17	18.48	1	2.31	3.16	4.28	6.84	0.97	0.95	0.37
10,11-Dihydro-10,11-dihydroxycarbamazepine	0.24	5.74	1.62	2.87	4.58	7.15	1	1.48	2.63	4.31	6.68	1	0.99	0.934
1H-Benzotriazole	1.34	2.7	2.5	3.25	4.62	5.3	0.99	2.55	3.58	4.67	5.51	1	1	1.039
2,4-Dichlorophenoxyacetic acid	0		1.31	2.28	3.52	5.76	1	1.18	2.25	3.61	5.95	1	1	1.033
2,6-Dichlorobenzamide	0.05	3.35	1.25	2.27	3.38	5.51	1	1.17	2.27	3.56	5.82	1	1	1.057
2-Aminobenzimidazole	0.01	141.42	7.29	13.82	21.62	35.68	1	7.49	14.75	17.85	30.39	0.99	0.97	0.852
2-Hydroxyatrazine	0.01	3.29	1.16	2.23	3.53	5.81	1	1.05	2.01	3.39	5.54	1	0.99	0.954
2-Naphthalene sulfonic acid	0.18	7.08	2.21	4.06	6.79	10.84	1	2.09	4.09	7.22	11.56	0.99	0.98	1.066
2-Octyl-4-isothiazolin-3-one	0		1.99	3.29	5.15	8.38	1	1.73	3.27	4.95	8.2	1	1	0.978
3,5,6-Trichloro-2-pyridinol	0		1.01	2.21	4.03	6.64	0.99	0.93	2.2	3.76	6.27	0.99	0.99	0.945
3-Iodopropynyl butylcarbamate	0		0.09	0.16	0.27	0.44	1	0.07	0.14	0.23	0.38	1	0.99	0.859
4-Isopropylaniline	0.01	79.36	0.67	1.44	1.88	3.19	0.99	0.33	0.76	1.67	2.71	0.97	0.94	0.851
5-Fluorouracil	0		0.14	0.26	0.41	0.68	1	0.01	0.03	0.03	0.05	0.98	0.97	0.078
5-Methyl-1H-benzotriazole	1.07	1.97	2.73	3.75	5.38	6.98	1	2.51	3.76	5.07	6.63	1	1	0.949
Acetaminophen	0		1.42	2.49	4.09	6.67	1	1.22	2.37	3.11	5.24	0.99	0.99	0.786
Acetamiprid	0		1.58	2.77	4.45	7.26	1	1.47	2.83	4.29	7.12	1	1	0.98
Acetochlor	0		2.34	4.35	7	11.51	1	2.14	3.84	6.36	10.39	1	0.99	0.903
Acetyl-sulfamethoxazole	0.05	15.64	5.74	10.1	15.94	26	1	5.22	10.07	15.36	25.38	1	1	0.976
Amantadine	0.04	9.13	4.97	9.06	15.2	24.79	1	4.44	8.53	13.58	22.36	1	1	0.902
Amitriptyline	0		3.21	5.57	9.23	15.03	1	1.88	3.39	6.47	10.46	0.99	0.98	0.696
Atenolol	0.08	2.17	1.21	2.18	3.4	5.46	1	1.13	2.16	3.26	5.29	1	1	0.969
Atorvastatin	0		0.9	1.72	2.67	4.41	1	0.18	0.4	0.64	1.06	1	1	0.241
Atrazine-desethyl-2-hydroxy*	0	10.1	0.96	1.88	2.94	4.87	1	0.93	1.64	2.54	4.16	1	1	0.855
Atrazine	0.02	5.58	1.25	2.27	3.6	5.88	1	1.16	2.25	3.47	5.71	1	1	0.971
Azithromycin	0		0.98	1.9	3.07	5.06	1	0.7	1.23	2.36	3.8	0.99	0.97	0.752
Azoxystrobin	0		4.27	7.22	10.07	16.58	0.99	3.93	6.58	9.01	14.84	0.99	0.99	0.895
Bentazone	0	20.2	0.65	1.15	1.75	2.87	1	0.62	1.13	1.68	2.78	1	1	0.966
Benzophenone-3	0		0.59	0.98	1.29	2.14	0.99	0.47	0.78	1.31	2.11	1	0.99	0.989
Benzyldimethylhexadecylammonium	0.02	66	2.66	5.2	2.02	4.27	0.52	0.39	0.19	1.16	1.61	0.83	0.68	0.377
Bezafibrate	0.02	2.32	1.05	2.04	3.1	5.11	1	1.02	1.88	2.94	4.81	1	1	0.942
Bicalutamide	0		0.69	1.27	1.85	3.07	1	0.67	1.25	1.88	3.11	1	1	1.014
Bifenox free acid	0		0.36	0.67	1.13	1.84	1	0.33	0.66	1.06	1.76	1	1	0.954
Bisoprolol	0.01	6.8	0.79	1.42	2.28	3.72	1	0.59	1.13	1.92	3.13	1	0.99	0.842
Boscalid	0		0.25	0.43	0.67	1.09	1	0.22	0.41	0.58	0.96	1	1	0.879
Bromoxynil	0		2.33	4.65	6.96	11.59	1	2.09	4.35	7.17	11.88	1	1	1.024
Bupropion	0		1.48	2.5	3.74	6.12	1	1.05	1.93	3.09	5.07	1	1	0.829
Caffeine	1.28	2.59	2.54	3.47	5.01	6.05	1	2.57	3.51	4.73	5.64	1	1	0.931
Candesartan	0.07	8.41	1.06	1.91	3.02	4.85	1	0.99	1.86	2.9	4.69	1	1	0.966
Carbamazepine	0.58	0.64	2.78	3.91	5.99	8.68	0.99	2.46	4.06	5.82	8.66	1	1	0.998
Carbendazim	0.02	2.67	0.76	1.41	2.27	3.7	1	0.74	1.4	2.26	3.69	1	1	0.998
Cetirizine	0.03	4.2	0.22	0.38	0.62	0.97	1	0.23	0.33	0.54	0.82	0.99	0.98	0.85
Chlorfenvinphos	0		1.11	1.97	3.19	5.21	1	0.91	1.87	2.9	4.83	1	1	0.926
Chloridazon	0		1.2	2.13	3.45	5.64	1	1.1	2.08	3.24	5.35	1	1	0.95
Chlorotoluron	0.01	16.33	1.16	2.06	3.24	5.3	1	1.08	1.99	3.03	4.99	1	1	0.943
Chlorpyrifos*	0		1.02	1.83	3.09	5.05	1	0.79	1.62	2.54	4.22	1	1	0.836
Chlorthalidon*	0		0.61	1.1	1.76	2.88	1	0.64	1.19	1.89	3.11	1	1	1.08
Ciprofloxacin	0		1.06	2.11	3.1	5.17	1	0.77	1.44	2.43	3.98	1	0.99	0.769
Citalopram	0.01	11.79	1.21	2.32	3.64	5.99	1	0.86	1.54	2.73	4.42	0.99	0.99	0.737
Clarithromycin	0.09	6.76	1.8	3.3	5.11	8.29	1	1.39	2.48	4.25	6.79	0.99	0.99	0.82
Climbazole	0.01	6.15	0.7	1.28	2.01	3.3	1	0.63	1.22	1.9	3.14	1	1	0.95
Clofibric acid	0		1.15	2.05	3.29	5.38	1	1.07	2.04	3.18	5.25	1	1	0.977
Clomazone	0		0.78	1.55	2.44	4.04	1	0.83	1.55	2.38	3.93	1	1	0.973
Clothianidin	0		1.06	1.8	3.01	4.89	1	0.98	1.84	3.05	5.01	1	0.99	1.025
Clotrimazole	0		0.53	1.07	2.02	3.3	0.99	0.45	0.96	2.38	3.82	0.96	0.91	1.159
Clozapine	0.12	41.53	1.29	2.46	4.24	6.76	0.99	1.31	1.81	3.28	4.99	0.98	0.97	0.738
Codeine*	0.02	8.64	1.19	2.16	3.5	5.71	1	0.77	1.69	2.96	4.88	0.99	0.99	0.854
Cyclamate	0.15	3.74	1.88	3.21	5.15	8.17	1	0.55	0.87	1.06	1.53	0.99	0.98	0.187
Cyclophosphamide	0		1.03	1.85	2.86	4.7	1	0.95	1.7	2.77	4.54	1	1	0.965
Cyproconazole	0.82	2.14	8.25	14.83	22.3	35.52	1	7.32	14.19	21.07	33.81	1	1	0.952
Cyprodinil	0		3.39	6.5	7.43	12.69	0.97	2.58	3.67	6.32	10.03	0.99	0.98	0.79
DCOIT	0		1.22	1.97	2.05	3.45	0.94	0.53	0.81	1.62	2.57	0.98	0.96	0.745
DEET	0.05	0.9	0.92	1.53	2.42	3.86	1	0.82	1.52	2.25	3.65	1	1	0.947
Desethylatrazine	0.03	6.77	1.09	2	3.2	5.21	1	1.06	1.96	3.08	5.02	1	1	0.963
Desethylterbutylazine	0.01	9.07	0.96	1.85	2.95	4.85	1	1.04	1.89	3.01	4.93	1	1	1.015
Desisopropylatrazine	0		1.21	2.22	3.33	5.5	1	1.16	2.09	3.33	5.46	1	1	0.993
Dexamethasone	0		0.48	0.85	1.27	2.1	1	0.44	0.76	1.22	1.99	1	1	0.947
Diatrizoate	0.01	3.82	0.45	0.84	1.24	2.04	1	0.39	0.77	1.16	1.92	1	1	0.939
Diazepam	0		0.67	1.3	2.03	3.36	1	0.68	1.22	1.9	3.12	1	1	0.928
Diazinon	0		0.28	0.51	0.79	1.3	1	0.25	0.48	0.73	1.21	1	1	0.929
Dichlorprop	0		1.35	2.34	3.82	6.23	1	1.25	2.42	3.69	6.12	1	1	0.982
Diclofenac	0.32	1.77	1.83	2.98	4.48	6.81	1	1.73	2.75	4.31	6.49	1	0.99	0.953
Didecyldimethylammonium	0		3.29	6.4	3.39	6.64	0.66	0.63	0.41	1.71	2.45	0.87	0.75	0.369
Difenoconazole	0		4.89	8.83	17.61	28.39	0.98	4.96	9.87	13	21.96	0.99	0.99	0.773
Diflufenican	0		1.16	2.18	3.33	5.5	1	1.09	2	3.23	5.3	1	1	0.964
Diglyme	0		0.47	0.91	1.11	1.88	0.99	0.59	0.89	1.31	2.12	0.99	0.98	1.126
Dimethachlor	0		1.45	2.84	4.67	7.7	1	1.48	2.63	4.55	7.4	1	0.99	0.96
Dimethachlor ESA	0	141.42	1.44	2.87	4.82	7.94	1	1.39	2.91	5.38	8.83	0.99	0.98	1.112
Dimethachlor OA	0		0.64	1.19	1.93	3.16	1	0.61	1.22	2.03	3.35	1	0.99	1.058
Dimethenamid	0		0.89	1.54	2.47	4.02	1	0.78	1.45	2.33	3.83	1	1	0.952
Dimethoate	0		1.01	1.75	2.73	4.46	1	0.94	1.77	2.64	4.38	1	1	0.981
Dimethylaminophenazone	0.05	11.09	8.98	17.14	26.63	43.95	1	6.35	14.12	20.37	34.36	1	1	0.782
Dinoseb	0		3.83	7.05	14.91	23.98	0.98	3.94	9.74	14.11	24.06	1	0.99	1.003
Diuron	0.01	12.44	0.9	1.66	2.65	4.33	1	0.85	1.59	2.42	3.98	1	1	0.918
EDDP	0.01	8.84	1.2	2.12	3.44	5.62	1	0.23	0.4	0.74	1.18	0.99	0.98	0.21
Erythromycin	0		1.12	1.82	2.81	4.57	1	0.84	1.45	2.36	3.84	1	1	0.842
Ethofumesate	0		0.17	0.32	0.48	0.8	1	0.15	0.28	0.44	0.72	1	1	0.897
Exemestane	0		2.2	4.06	6.19	10.2	1	2.01	3.6	5.61	9.22	1	1	0.904
Fenhexamid*	0		3.27	5.6	8.49	13.9	1	2.7	4.89	7.38	12.17	1	1	0.875
Fenofibrate	0		1.3	2.5	3.96	6.54	1	1.13	2.22	3.23	5.39	1	1	0.824
Fenoxycarb	0		1.51	2.53	3.1	5.15	0.98	1.15	1.82	3.07	4.94	0.99	0.99	0.958
Fenpropidin	0		4.18	7.6	12.48	20.43	1	3.03	5.48	9.53	15.52	0.99	0.99	0.759
Fenpropimorph	0		2.2	4.05	5.95	9.85	1	1.75	3.15	4.67	7.71	1	1	0.782
Fipronil	0		4.02	6.97	9.97	16.42	1	3.48	6.12	9.16	15.06	1	1	0.917
Fipronil sulfide	0		2.8	4.5	4.68	7.87	0.94	2.04	2.51	4.5	6.98	0.98	0.95	0.886
Fipronil sulfone	0		3.36	5.63	5.58	9.5	0.93	2.37	2.73	5.36	8.22	0.97	0.94	0.865
Fluconazole	0.01	5.83	1.19	2.24	3.51	5.77	1	1.07	2.13	3.51	5.78	1	1	1
Flufenacet	0		0.58	0.98	1.42	2.33	1	0.52	0.94	1.39	2.29	1	1	0.983
Flufenamic acid*	0.03	19.61	0.77	1.58	3.45	5.54	0.97	0.98	2.38	3.46	5.85	1	0.99	1.056
Fluoxastrobin	0		5.06	8.62	11.9	19.63	0.99	4.09	7.53	10.08	16.84	0.99	0.99	0.858
Flusilazole	0		1.18	2.12	2.98	4.94	1	1.05	1.74	2.82	4.57	1	0.99	0.926
Gabapentin	0.02	5.85	0.74	1.34	2.16	3.51	1	0.06	0.09	0.12	0.16	1	1	0.044
Hexazinone	0		1.53	2.62	4.02	6.56	1	1.34	2.49	3.75	6.2	1	1	0.944
Hydrochlorothiazide	0.33	1.26	2.11	3.55	5.58	8.59	1	1.98	3.61	5.5	8.57	1	1	0.997
Ibuprofen	0.08	5.65	1.17	2.06	2.93	4.72	1	1.1	1.87	3.22	5.09	0.99	0.99	1.078
Icaridin	0		0.68	1.25	2.05	3.35	1	0.71	1.39	2.01	3.36	1	1	1.002
Ifosfamide	0		5.22	9.76	15.83	26.01	1	5.13	9.21	15.07	24.64	1	1	0.947
Imidacloprid	0		1.29	2.29	3.81	6.22	1	1.14	2.17	3.58	5.88	1	1	0.946
Imidacloprid-guanidine	0		4.37	7.37	10.78	17.66	1	3.83	7.1	10.69	17.67	1	1	1
Imidacloprid-urea	0		2.48	4.63	7.55	12.4	1	2.3	4.21	6.86	11.24	1	1	0.906
Iminostilbene	0		4.46	9.06	11.62	19.73	0.99	1.15	1.46	3.54	5.45	0.96	0.91	0.276
Indometacin	0.01	33.28	1.05	1.81	2.9	4.71	1	0.92	1.71	2.61	4.31	1	1	0.914
Iohexol	0	141.42	0.42	0.84	1.33	2.2	1	0.36	0.71	1.13	1.86	1	1	0.845
Iopamidol	0.1	13.35	0.42	0.71	1.09	1.63	1	0.39	0.69	0.98	1.47	1	1	0.904
Iprodione	0		0.07	0.18	0.33	0.54	0.99	0.03	0.05	0.11	0.17	0.98	0.95	0.311
Irgarol	0		1.03	1.74	2.78	4.53	1	0.94	1.69	2.71	4.44	1	1	0.981
Isoproturon	0	10.88	0.71	1.28	2.15	3.51	1	0.63	1.19	1.9	3.12	1	1	0.89
Ketamine	0		3.78	7.02	10.78	17.79	1	3.61	6.75	9.78	16.24	1	1	0.913
Ketoprofen	0.08	5.1	3.06	5.5	8.13	13.3	1	3.03	5.24	8.15	13.2	1	1	0.993
Lamotrigine	0.08	2.96	0.88	1.5	2.38	3.75	1	0.81	1.48	2.32	3.69	1	1	0.984
Lenacil	0		0.44	0.72	1.19	1.92	1	0.38	0.71	1.07	1.76	1	1	0.917
Lidocaine	0.02	11.85	1.43	2.48	3.91	6.37	1	0.93	1.87	3.27	5.35	0.99	0.99	0.84
Linuron	0		0	2.78	3.91	7.26	0.94	1.4	2.5	3.81	6.27	1	1	0.863
Lorazepam	0		0.36	0.66	1.03	1.7	1	0.35	0.63	0.96	1.58	1	1	0.93
Losartan	0.01	10.11	0.59	1.05	1.58	2.59	1	0.45	0.87	1.3	2.14	1	1	0.827
MCPA	0		1.15	2.11	3.35	5.5	1	1.06	2.14	3.24	5.39	1	1	0.982
Mefenamic acid	0.09	4.82	1.62	2.89	4.64	7.47	1	1.5	2.78	4.27	6.92	1	1	0.927
Metalaxyl	0.01	3.29	0.66	1.25	2	3.28	1	0.65	1.21	1.92	3.14	1	1	0.956
Metamitron	0		2.18	3.75	6.5	10.53	0.99	1.93	3.77	6.11	10.09	1	1	0.958
Metazachlor	0		0.56	0.9	1.44	2.33	1	0.51	0.96	1.38	2.3	1	1	0.986
Metazachlor ESA	0.02	27.53	0.86	1.64	2.67	4.37	1	0.79	1.64	2.73	4.49	1	0.99	1.028
Methiocarb	0		1.03	1.88	3.16	5.16	1	0.88	1.64	2.82	4.6	1	0.99	0.892
Methomyl	0		0.19	0.3	0.42	0.69	0.99	0.18	0.32	0.42	0.7	0.99	0.99	1.005
Methylchloroisothiazolinone	0		0.32	0.65	1.02	1.7	1	0.28	0.57	0.86	1.43	1	1	0.843
Metolachlor	0.01	4.56	1	1.78	2.67	4.38	1	0.92	1.7	2.55	4.21	1	1	0.961
Metolachlor ESA	0.09	8.25	1.38	2.46	3.81	6.13	1	1.26	2.29	3.49	5.62	1	1	0.917
Metolachlor OA	0		2.09	3.91	5.83	9.66	1	1.9	3.72	6.14	10.12	1	1	1.047
Metoprolol	0.04	6.72	0.71	1.25	1.99	3.19	1	0.6	1.06	1.7	2.72	1	1	0.854
Metoprolol acid	0.65	3.91	2.34	3.84	5.8	8.48	1	2.25	3.94	5.42	8	1	1	0.943
Metribuzin	0		1.16	2.18	3.42	5.64	1	1.05	1.99	3.2	5.27	1	1	0.934
Moclobemid*	0		2.63	4.99	7.61	12.6	1	1.86	3.78	6.69	11	0.99	0.99	0.873
Myclobutanil	0		5.17	10.24	15.89	26.36	1	4.64	9.77	14.67	24.57	1	1	0.932
Mycophenolic acid	0.02	12.7	0.55	0.94	1.38	2.23	1	0.53	0.97	1.33	2.18	1	1	0.977
N-Acetyl-4-aminoantipyrine	1.87	2.15	4.65	6.3	8.83	11.26	1	4.47	7.08	8.7	11.54	0.99	0.99	1.025
Naproxen	0.16	10.31	1.37	2.39	3.73	5.87	1	1.33	2.27	3.65	5.72	1	0.99	0.975
N-Formyl-4-aminoantipyrine	0.71	3.05	3.43	5.23	7.43	10.97	1	3.2	5.83	7.37	11.3	0.99	0.99	1.03
Nicosulfuron	0		0.54	0.97	1.52	2.5	1	0.47	0.93	1.47	2.44	1	1	0.975
Norfloxacin	0		1	2.07	3.19	5.33	1	0.72	1.36	2.43	3.96	0.99	0.99	0.744
Oxazepam	0.03	13.91	1.66	3.07	4.78	7.82	1	1.55	2.9	4.71	7.69	1	1	0.982
Oxybutynin	0		2.84	5.27	7.81	12.93	1	1.72	3.07	5.41	8.78	0.99	0.99	0.679
Penconazole*	0		0.86	1.49	2.46	4	1	0.76	1.41	2.3	3.77	1	1	0.944
Pethoxamid	0		10.32	19.62	31.55	51.97	1	9.52	17.38	28.49	46.66	1	1	0.898
Phenazone	0.03	5.6	1.39	2.66	4.08	6.7	1	1.19	2.33	3.71	6.09	1	1	0.909
Piperonyl butoxide	0		0.07	0.09	0.14	0.22	0.99	0.04	0.07	0.12	0.19	0.99	0.99	0.856
Pirimicarb	0		1.22	2.37	3.64	6.03	1	1.13	2.1	3.27	5.39	1	1	0.893
Prednisolone	0		0.37	0.59	0.95	1.53	1	0.32	0.55	0.82	1.35	1	1	0.882
Primidone	0		0.82	1.37	2.02	3.31	1	0.79	1.27	2.2	3.54	0.99	0.99	1.071
Prochloraz	0		1.14	2.07	3.46	5.65	1	1.04	1.88	3.04	4.98	1	1	0.881
Propachlor	0		0.4	0.74	1.18	1.94	1	0.38	0.69	1.19	1.94	1	0.99	0.999
Propamocarb	0.01	23.33	4.57	9.09	15.37	25.31	1	3.1	7.49	9.7	16.74	0.99	0.99	0.661
Propiconazole	0.01	6.8	1.18	2.12	3.37	5.51	1	1.06	2.05	3.17	5.24	1	1	0.95
Propranolol	0		1.21	2.08	3.46	5.63	1	0.97	1.73	2.83	4.63	1	1	0.822
Prosulfocarb	0		3.07	6.5	11.34	18.73	0.99	2.95	7.27	11.07	18.76	1	0.99	1.002
Pyraclostrobin	0		0.99	1.81	1.82	3.14	0.94	0.74	0.86	1.67	2.56	0.97	0.94	0.816
Ranitidine	0	37.42	0.62	1.13	1.76	2.89	1	0.29	0.63	1.12	1.85	0.99	0.99	0.638
Roxithromycin	0		0.22	0.37	0.58	0.96	1	0.15	0.26	0.46	0.74	0.99	0.99	0.775
Saccharin	0.21	0.59	0.89	1.41	2.14	3.15	1	0.87	1.47	2.1	3.13	1	1	0.996
Simazine	0.01	6.15	1.32	2.49	3.86	6.36	1	1.25	2.36	3.62	5.97	1	1	0.939
Sotalol	0.02	4.42	0.84	1.5	2.45	3.98	1	0.77	1.45	2.28	3.73	1	1	0.939
Spiroxamine	0		2.1	3.85	6.02	9.91	1	1.31	2.21	4.06	6.53	0.99	0.98	0.659
Sucralose	0.8	4.75	2.08	3.51	4.39	6.09	1	1.9	2.97	4.24	5.69	1	1	0.934
Sulcotrione	0		1.86	3.56	5.61	9.26	1	1.84	3.76	5.96	9.9	1	1	1.069
Sulfadimethoxine	0		0.67	1.27	1.94	3.21	1	0.62	1.2	1.83	3.03	1	1	0.943
Sulfamethazine	0		2.11	3.95	6.12	10.11	1	1.99	3.81	6.01	9.93	1	1	0.982
Sulfamethoxazole	0.06	3.28	0.98	1.8	2.67	4.32	1	0.94	1.7	2.76	4.43	1	1	1.026
Sulfapyridine	0.02	7.06	1.39	2.54	3.85	6.33	1	1.21	2.38	3.85	6.33	1	1	1
Sulfathiazole	0.17	8.82	0.92	1.82	2.95	4.62	1	0.93	1.74	2.79	4.34	1	0.99	0.939
Tebuconazole	0	12.86	1.32	2.37	3.84	6.28	1	1.23	2.35	3.64	6.02	1	1	0.959
Telmisartan	0.05	16.56	0.68	1.2	1.65	2.66	1	0.64	0.91	1.42	2.18	0.99	0.98	0.82
Terbuthylazine	0.01	11.31	1.16	2.16	3.47	5.68	1	1.06	2.06	3.22	5.32	1	1	0.937
Terbuthylazine-2-hydroxy	0.07	3.69	7.13	14.14	20.68	34.42	1	6.54	12.77	21.2	34.81	1	0.99	1.011
Terbutryn	0.01	0	2.79	4.9	7.75	12.67	1	2.51	4.71	7.14	11.79	1	1	0.931
Tetraglyme	0.34	2.31	0.51	0.62	0.74	0.67	1	0.5	0.59	0.75	0.67	0.99	0.99	1.002
Thiacloprid	0		6.87	11.36	18.16	29.49	1	6.12	11.08	17.64	28.94	1	1	0.981
Thiamethoxam	0		1.09	1.94	3.3	5.37	1	0.98	2	3.1	5.16	1	1	0.96
Torasemide	0.01	5.66	0.68	1.28	2.17	3.54	1	0.6	1.12	1.95	3.18	0.99	0.99	0.897
Tramadol	0.13	5.85	1.41	2.41	3.7	5.86	1	1.17	2.12	3.38	5.36	1	1	0.915
Triclocarban	0		0.39	0.73	0.64	1.13	0.89	0.22	0.21	0.61	0.9	0.93	0.86	0.804
Triclosan	0		0.14	0.26	0.4	0.67	1	0.12	0.22	0.36	0.58	1	1	0.875
Triethylphosphate	0.76	3.49	4.9	9.74	14.76	23.41	1	6.26	11	16.37	25.78	1	1	1.101
Trimethoprim	0.02	5.1	0.74	1.42	2.1	3.47	1	0.69	1.4	2.21	3.64	1	1	1.049
Valsartan	0.44	2.82	1.51	2.31	3.31	4.71	1	1.41	2.26	3.32	4.75	1	1	1.009
Verapamil	0		1.16	2.19	3.38	5.59	1	0.87	1.51	2.62	4.25	0.99	0.99	0.76
